# Supplementary material
Source: publisher site journal article supplement (https://static.cambridge.org/content/id/urn:cambridge.org:id:article:S0950268818003096/resource/name/S0950268818003096suppmat001.docx)
Supplement: Supplementary file 1 [file S0950268818003096suppmat001.docx]

*Epidemiology and Infection*

**La Crosse virus: A Scoping Review of the Global Evidence**

S. Harding, J. Greig, M. Mascarenhas, I. Young, L. Waddell

**Supplementary Material**

Table of Contents

[S1: Scoping Review Protocol 2](#_Toc525718680)

[S2: Included References in Alphabetical Order 30](#_Toc525718681)

[S3. General characteristics of the 481 primary research articles on La Crosse virus (LACV) included in the scoping review. 54](#_Toc525718682)

[S4. Supplementary table of references associated with key research categories described in the results section and tables of the scoping review. 56](#_Toc525718683)

[S5. Fifty-six mosquito and seven non-mosquito vector species from 153 experimental and observational studies 60](#_Toc525718684)

[S6. The number and percent of articles reporting competence outcomes for the transmission of La Crosse virus in mosquito vectors infected by various modes (N=80). 63](#_Toc525718685)

[S7. Incubation period and viremic period of experimental La Crosse virus (LACV) infection by animal host (N=20) 65](#_Toc525718686)

[S8: Clinical signs, symptoms and sequelae reported in LACV infected animal hosts (N=21) 66](#_Toc525718687)

[S9. General characteristics of the articles (number and proportion) investigating human populations affected by La Crosse virus (N=174) 68](#_Toc525718688)

[S10. The number of cases and incidence rate of La Crosse virus (LACV) cases per 100000 person-years in the general human population captured through disease surveillance in the USA from 1963-2016 (N=130) 70](#_Toc525718689)

[S11. The proportion of La Crosse virus (LACV) cases in patients with CNS or encephalitis studied in the USA from 1967-2008 (N=8). 78](#_Toc525718690)

[S12. The seroprevalence of La Crosse virus (LACV) in humans from the USA from 1965-2010 (N=12). 79](#_Toc525718691)

[S13: Clinical signs and symptoms reported in LACV infected humans (N=46) 80](#_Toc525718692)

# S1: Scoping Review Protocol

**TITLE**

What are the characteristics of the global evidence on La Crosse encephalitis virus?

**AUTHORS**

Shannon Harding1, Lisa Waddell1, Judy Greig1, Mariola Mascarenhas1, Ian Young2

1Public Health Risk Sciences Division of the National Microbiology Laboratory @Guelph, Public Health Agency of Canada.

2 Ryerson University, Toronto ON, Canada

Contact: Lisa Waddell, Tel: 226-979-7174 or Email: lisa.waddell@canada.ca,

**RATIONALE**

This research aligns with PHRSD priorities, which include enhancing and guiding public health decision-making and policies by providing the authoritative analyses, recommendations and scientific collaborative services (using methods such as epidemiological studies and knowledge synthesis) to address the occurrence, trend and determinants of infectious disease in Canada with expert focus on the prevention of public health risks arising from the food chain, animals and the environment (LFZ, 2013).

This project has been prioritized via stakeholder consultation as an important vector-borne disease (VBD) that is likely to expand its range in Canada due to climate change. Funding for this project has been provided by the Public Health Agency of Canada’s VBD climate change and adaptation funding 2016-2021).

**BACKGROUND**

La Crosse encephalitis virus (LACV) is a rare viral disease that was first identified in La Crosse, Wisconsin, USA in 1963. The organism responsible for causing this disease is La Crosse virus, an arbovirus from the family Bunyaviridae. La Cross virus is the most pathogenic agent of the California encephalitis group and is the most common mosquito-borne disease that is native to North America. While LACV was originally confined to the Midwest US, in the past 20 years the virus has emerged in the mid-Atlantic which now has the highest reported risk for children less than 16 years old. Despite its recent emergence in the Mid-Atlantic USA, LACV has not received much attention in the literature.

The primary vector transmitting LACV is *Aedes triseriatus*, the tree-hole mosquito. *Aedes triseriatus* circulates LACV among small mammals including eastern chipmunks (*Tamias striatus*), gray squirrels *(Sciurus carolinensius*), and red foxes (*Vulpes fulva*). Transmission to humans occurs after the bite of an infected mosquito. It has been shown that humans rarely achieve high enough concentrations of LACV from one mosquito bite to develop a LACV infection or disease. Humans are considered an incidental and a dead end host in this transmission cycle.

Two other mosquito species have emerged to compete with *Aedes triseriatus* as vectors of LACV, *Aedes albopictus* and *Aedes japonicas;* although vertical transmission for *A. japonicas* has yet to be tested. The recent emergence of these two species in the Mid-Atlantic USA coincides with the increase in LACV cases reported in that region. Competition between the mosquito vectors and the geographic variation of abiotic and biotic environmental factors will make it difficult to predict the impacts of climate change and land use on LACV transmission.

According to CDC, there is an average of 80-100 LACV cases per year in the USA. Cases typically occur in late spring and early fall and most cases occur in children under 16 years old. There is very little literature that reports clinical illness from LACV infection in adults. A diagnosis can be made based on clinical features, travel and recent activities. Serological IgM tests are also used to diagnose LACV, these tests are usually available from state health department laboratories and/or the CDC in the USA. Isolation of the virus is difficult and usually attempted from brain tissue and CSF samples.

The time from the bite of an infected mosquito to the onset of illness ranges from 5 to 15 days. Infected people can be asymptomatic or have mild symptoms including fever, headache, myalgia, malaise and occasional prostration. As such, mild infections are often misdiagnosed as a cold or flu. Severe cases can lead to encephalitis with significant neurological sequelae or death (0.5% of cases). Long-term sequelae include lifelong neurological symptoms that represent a substantial economic burden (> $3 million/ patient). At this time there are no licensed therapeutics or vaccines for LACV.

Sources:

Rey, J. R. (2008). La Crosse Encephalitis. In *Encyclopedia of Entomology* (pp. 2117-2119). Springer Netherlands.

Teleron, A. L. A., Rose, B. K., Williams, D. M., Kemper, S. E., & McJunkin, J. E. (2016). La Crosse Encephalitis: An Adult Case Series. *The American journal of medicine*.

Leisnham, P. T., & Juliano, S. A. (2012). Impacts of climate, land use, and biological invasion on the ecology of immature Aedes mosquitoes: implications for La Crosse emergence. *Ecohealth*, *9*(2), 217-228.

Taylor, K. G., & Peterson, K. E. (2014). Innate immune response to La Crosse virus infection. *Journal of neurovirology*, *20*(2), 150-156.

La Crosse encephalitis. Accessed Nov 24, 2016: https://www.cdc.gov/lac/

**STUDY QUESTION**

What are the characteristics of the global evidence on La Crosse encephalitis virus?

Planned Study Outputs

1. A scoping review of the global evidence.
2. A repository and dataset of all relevant literature captured in this study.

**METHODS**

**Review Team Expertise and Responsibilities:**

| **Member** | **Organization** | **Project Role** |
| --- | --- | --- |
| Lisa Waddell | PHRS /NML | Synthesis expertise |
| Judy Greig | PHRS /NML | Synthesis expertise/TBD |
| Mariola Mascarenhas | PHRS /NML | Synthesis expertise |
| Shannon Harding | PHRS/NML | Project lead; Synthesis expertise/ TBD |
| Ian Young | Ryerson University | Synthesis expertise |

**Search Strategy:**

| **Library/Database** | **Date of Search** | **Search String** | **# Hits** |
| --- | --- | --- | --- |
| PubMed | November 30, 2016 | (“La Crosse” OR “LaCrosse”) AND (encephalitis OR virus) | **494** |
| Scopus | November 30, 2016 | (“La Crosse” OR “LaCrosse”) AND (encephalitis OR virus) | **547** |
| Agricola 1970-/CAB 1973- /EMBASE 1974-, searched together as they are provided by OVID via the PHAC library. | November 30, 2016 | Article Title, Abstract, Keywords (“La Crosse” OR “LaCrosse”) AND (encephalitis OR virus) | **994** |
| Cochrane Central Register of Controlled Trials | November 30, 2016 | (“La Crosse” OR “LaCrosse”) AND (encephalitis OR virus) | **1** |
| ProQuest Dissertations & Theses | November 30, 2016 | (“La Crosse” OR “LaCrosse”) AND (encephalitis OR virus) | **43** |

Total # of citations prior to de-duplication (from above databases): **2079**

Total # of citations after 1st round of de-duplication in RefWorks: **846**

Total # of citations after 2nd round of de-duplication in DistillerSR: **743**

Total # citations added from search verification = **5**

Total # citations added from the grey literature search = **120**

**Grey Literature Sources and Procedures:**

The Centers for Disease Control and Prevention (CDC) website was first searched to identify which states had previously reported LACV cases (confirmed and probable). The CDC reported cases from 21 states (data available 2004-2013). The state health department websites were then searched for published/unpublished primary reports, news bulletins, and annual or semi-annual surveillance reports that reported LACV cases and that were not captured by the original electronic search.

**Search Verification:**

Reference lists were screened for potentially relevant citations that were missed by the electronic search. Literature reviews that focused on LACV were first identified at the relevance screening level. Of the reviews identified, 11 included La Crosse in the title. We were able to procure 6 of the 11 reviews and requested an additional 2 reviews from the library in order to reach a point of saturation where no new references were identified.

The 8 papers evaluated were:

Goddard, J. (2000). Viruses transmitted by mosquitoes: La Crosse encephalitis. Infections in Medicine, 17(6), 407-410.

Kalfayan, B. (1983). Pathology of La Crosse virus infection in humans. Progress in clinical and biological research, 123, 179.

Borucki, M. K., Kempf, B. J., Blitvich, B. J., Blair, C. D., & Beaty, B. J. (2002). La Crosse virus: replication in vertebrate and invertebrate hosts. Microbes and Infection, 4(3), 341-350.

Byrd, B. D. (2016). La Crosse Encephalitis A Persistent Arboviral Threat in North Carolina. North Carolina Medical Journal, 77(5), 330-333.

Leisnham, P. T., & Juliano, S. A. (2012). Impacts of climate, land use, and biological invasion on the ecology of immature Aedes mosquitoes: implications for La Crosse emergence. Ecohealth, 9(2), 217-228.

McJunkin, J. E., Khan, R. R., & Tsai, T. F. (1998). California–La Crosse encephalitis. Infectious disease clinics of North America, 12(1), 83-93.

Rust, R. S., Thompson, W. H., Matthews, C. G., Beaty, B. J., & Chun, R. W. (1999). Topical review: La Crosse and other forms of California encephalitis. Journal of Child Neurology, 14(1), 1-14.

Taylor, K. G., & Peterson, K. E. (2014). Innate immune response to La Crosse virus infection. Journal of neurovirology, 20(2), 150-156.

**Relevance Screening (RS):**

The relevance screening level will be done on the title, abstract, and keywords where available. There is 1 question that encompasses the inclusion / exclusion criteria, this tool can be found in the appendix.

**Inclusion / Exclusion criteria:**

1. Time frame – no time frame
2. Country – All
3. Language – English, French. All other languages will be identified and parked until resources and time is available. e.g. Spanish or Portuguese
4. Document Type: All - any peer-review primary articles, PhD/MSc Theses, reports.

5) Agent/Disease: La Crosse encephalitis virus (LACV)

6) Study design: all

7) Primary research: all articles describing primary research on the virus, or infection in any reservoir, vector or incidental host will be included. Relevant secondary research e.g. literature reviews and predictive models will be identified as such for search verification unless they are predictive models evaluating the impact of climate change on this virus, in which case it will be included for summarization. All other citations will be excluded.

**Study Characterization:**

The study characterization form will aim to classify and characterize the research on La Cross encephalitis virus (LACV) so we can understand where there are areas of knowledge saturation and gaps. The form will first confirm the relevance of the publication prior to extracting the characteristics of the study. This will include; study design, population, setting, outcomes, whether there is extractable data, and if the study addresses the impacts of climate change on this virus.

**Review Management:**

The search strategy will be compiled and de-duplicated in Refworks. This database will then be exported to Distiller SR, a web-based systematic review software designed to manage all stages of conducting scoping reviews and systematic reviews. All stages of the scoping study from relevance screening to data extraction will be conducted within this software. The final dataset will be exported into MS Excel, cleaned and tabulated for use in the publication and reports.

**Data Analysis:**

Descriptive tabulation of all pertinent information that aids in the characterisation and illustration of the available knowledge on LACV will be conducted mainly in MS excel unless further statistical analysis is required. Findings and recommendations, methods incorporated and their usefulness, and study limitations will also be captured.

**RELEVANCE SCREENING TOOL**

**What are the characteristics of the global evidence on La Cross encephalitis virus?**

**Relevance Screening Tool for Abstracts:**

| **Question** | **Options** | **Definitions/additional notes** |
| --- | --- | --- |
| Does this citation describe primary research on **La Crosse encephalitis virus** or a predictive model examining the impacts of climate change on **La Crosse encephalitis virus**? |  Yes – relevant primary research   Yes- relevant predictive CC model  No – relevant review   No – conference proceeding book   No – book, not primary lit.   No – other relevant non-primary source   No, not relevant (excluded, submit form) | **La Crosse encephalitis virus:** a rare arbovirus that predominately infects children under the age of 16. This virus is known to cause illness in humans in the USA. The epizootic cycle mainly includes small mammals. Include ALL research on this virus.  **Primary research** represents a study where the authors collected and analyzed their own data – may use quantitative or qualitative methods or both to investigate the research question and report original results.  **Predictive Model:** Any citation describing the use of published information to model the issue and make predictions. **Climate change:** any predictive model looking at the effects of a changing climate e.g. temperature, rainfall etc. should be included in this review.  **Review/commentary** is acomprehensive or brief narrative review or commentary (from peer-reviewed articles journals) summarising knowledge on an issue (include systematic reviews in here.)  **Other non-primary** will encompass lay magazine or newspaper articles etc.  Exclude:  Primary research not on the virus of interest. |

2 reviewers independently will evaluate each citation.

**DATA CHARACTERIZATION AND UTILITY (DCU) FORM**

**Broad topic:**

**What are the characteristics of the global evidence on La Crosse encephalitis virus?**

**Note:** Remember to only extract information for the applicable question – **not all questions apply.** Be very specific about the data you extract AND only **extract primary information** (information collected by the author in the course of a study).

| **Question** | **Options** | **Definitions/Additional notes** |
| --- | --- | --- |
| **Relevance Verification**  The first three questions are designed for verification of the relevance of the article. Please answer all 3 questions prior to submitting the form; we would like to characterize the foreign language papers by focus of the paper. If the foreign language papers are likely not relevant, please indicate this in the focus question so we are not over inflating the number of relevant studies we excluded due to language. | | |
| What language is the article published in? | - English - French - Other, please specify: ____ (Exclude) |  |
| What type of document is this article? | - Primary research in peer-reviewed journal - Predictive model on LACV - Thesis - Grey literature with primary data (government or research reports) - Conference proceeding with sufficient detail - Literature review (Exclude) - Systematic review/meta-analyses (Exclude) - Grey literature; may report previously reported research (newspaper or magazine articles; exclude) - Conference proceeding with insufficient detail | **Primary research:** original research/investigation/study carried out by the researcher (incl. surveys, interviews, outbreak reports, observations, etc.)  **Thesis:** a long paper/essay or dissertation involving personal research (usually written for a university degree)  **Conference proceeding abstract/short paper:** a collection of published academic papers  **Literature review:** examination of published literature  **Systematic review/meta-analyses:** analysis and interpretation of primary research  **Grey literature:** research that is unpublished or published in a non-commercial form |
| Verify the relevance and focus of the paper, this paper describes research on LACV or LACV infection in humans, vectors, hosts or other animal species or describes a climate change model for LACV?  (Check all that apply; When answering this question, only check off the topics for which there are study outcomes and do not check if a category was just “mentioned” in the paper.) | - **Pathogenesis** of LACV in human and animal hosts - LACV infection, clinical characteristics and complications including affected organs and systems in any species - Infection mechanism (cellular level) in the host - Immune response in the host (proteins, genes and receptors) - Animal pathogenesis model - **Treatment** of LACV infection - Evaluation of **diagnostic tests** for LACV - **Epidemiology** of LACV (prevalence, incidence, risk factors of exposure/disease) - **Transmission** of LACV or necessary conditions for transmission of LACV between vector and animal host or human (include vector characteristics/behaviour for LACV transmission). - **Surveillance** to determine the extent of LACV infections - La Crosse encephalitis **Virus study** (examines virus attributes such as pathogenesis, transmission characteristics and/or molecular characterisation) - Efficacy of **mitigation** strategies to prevent and/or control LACV infection in humans, hosts or vectors. - **Societal knowledge, attitudes and/or risk perceptions** towards LACV and potential mitigation strategies - **Economic burden or cost-benefit** analysis of LACV infection and/or mitigation strategies - **Predictive climate change model** for LACV - **Other** LACV topic (Use if absolutely necessary) - Not relevant to the review including research on predictive models for the vector and research on vectors of LACV but not the virus itself (e.g. mitigation, abundance, density, general survival attributes and characteristics of the vector unrelated to its LACV status.) | ***Pathogenesis:*** biological processes/mechanisms/pathways that lead to LACV in human or animal hosts. This includes the following:   - Pathology of disease (chronic or acute signs and symptoms and organs /systems e.g. CNS affected) - Infection mechanisms (at cellular level, stages of infection) including LACV entry/exit or inhibitors of LACV entry/exit in the host - Immune response (Proteins/genes/receptors involved; in host and vector) - Animal models studying pathogenesis   ***Diagnostic tests*** refer to tests detecting the presence of LACV in humans, non-human hosts or vectors.  ***Epidemiology:*** Please include articles describing outbreak and sporadic cases, incidence/ prevalence for LACV, and/or risk factors for developing LACV infection or risk factors/conditions (environmental and climatic mostly) for LACV survival in vectors.  *Risk factors* are environmental, behavioural, or biologic factors usually in longitudinal, cross-sectional, cohort or case control studies where exposures and outcomes are studied. A risk factor indicates an association with an increase or decrease in disease in the population with the risk factor compared to that without.  ***LACV transmission*** passing of virus from an infected host to another vector/host; e.g. tick transmission, mother to child and/or through blood transfusion and adaptability, the ability to adapt to new host/environment or become resistant to drug. This could also be climatic conditions required for virus transmission.  ***Vector suitability studies for LACV transmission*** include:   - Characteristics of competent LACV vector (genes, adaptations, etc.; ability to transmit disease) - Range and density of LACV infected vector and/or environmental/climatic conditions to sustain LACV infected vector population - Vector activity (biting rate, Fecundity/fertility rate, reproductive rate etc.) - Extrinsic incubation period (Interval between the uptake of LACV by vector and vector’s ability to transmit LACV to other susceptible hosts) - Transmission/rate of infectivity (ie: how many people could be exposed by one infected vector and how many vectors are likely to become infected by one viremic human or animal/host)   ***Surveillance***is the ongoing and systematic collection, analysis, and interpretation of outcome-specific data for use in the planning, implementation, and evaluation of public health practice. Include studies evaluating surveillance methods/programs.  Examples :   - Surveillance of human cases - Sylvatic host surveillance (Sylvatic cycling is when pathogen transmission occurs between animal i.e., sylvatic hosts and vectors) - Mosquito/vector surveillance   ***La Crosse encephalitis Virus studies*** included are typically studies that focus only on the virus, thus experiments are in vitro or analysis is focused on genetic analysis to characterize LACV:   - Molecular characterization of LACV (e.g. mutations, phylogenetic analysis) - LACV pathogenic attributes (Describes how viruses cause disease e.g. virulence factors, viral entry/exit/cycle (includes latency period), viral replication)   ***Mitigation strategies = interventions***  *Note: Relevant mitigation studies need to have an outcome that measures a change in the burden of LACV in humans, hosts or vectors. Measuring only abundance of mosquitos (or other vector) is outside the scope of this review and will be captured in the vector mitigation reviews.*   - Studies looking at intervention efficacy include control or challenge trials and quasi experiments (before and after). - Program evaluations can fall in here. - Risk factors looking at presence/absence of an intervention should also be checked here. - Examples include (but are not limited to) land management, vector management and control, personal protection, and public education campaigns   ***Risk perceptions***are the subjective judgements that people make about the characteristics and severity of a risk. Do individuals feel they are at risk? Do they have knowledge that they can implement to decrease their risk? What are their feelings concerning using sprays or treating vectors to decrease the risk of disease transmission?  ***Economic burden*** will include an actual dollar amount or discussion of implied cost associated with mitigation strategies.  ***Cost benefit analysis*** is a systematic process for calculating and comparing benefits and costs of a project, decision or government policy.  ***Predictive models*** are mathematical or statistical models used to forecast outcomes, spread of LACV and/or trends. Examples include (but are not limited to) using climate to predict outbreaks and/or models predicting high-risk populations. In the provided text box, please describe model in one line. If possible, copy and paste text from the abstract/objectives section. |
| **If exclusion criteria were selected above, submit the form before proceeding** | | |
| **General Information** | | |
| From what continent(s) were the samples obtained? (if not specified, resort to author affiliations)  Specify the country(ies)  Specify the state or province if an observational study: | - North America - Europe - Australasia - Central America/South America/Caribbean - Asia - Africa - Other   ___TXT___  ___TXT___ | **North America:** includes Canada, USA and Mexico  **Europe:** includes, Belarus, Latvia, Ukraine, Estonia, Cyprus & west (incl. Iceland and Greenland)  **Australasia:** limited to Australia, New Guinea, New Zealand, New Caledonia, and neighbouring islands, including the Indonesian islands from Lombok and Sulawesi eastward  **Central America/South America/ Caribbean:** includes Caribbean, and all of south and central America.  **Asia:** Russia, Turkey, middle eastern countries and east  **Please specify country in the text box and the province /state if relevant in the textboxes using the full name (exception: USA))** |
| When was the article published? Specify year XXXX | ___TXT___ | **Year** e.g. 1979 |
| When were samples collected or the study conducted? Specify year XXXX  (This will allow aggregation of results according to timeframe) | ___TXT___ | **Dates**: year/month (if available) e.g. 1984/05 – 1989/12  Note “NA” for experiments unless actually specified. |
| What is the study design? | - Observational study - Case series/ case report - Population-based case series - Cohort - Case control - Cross-sectional - Prevalence survey - Surveillance or monitoring program - Outbreak investigation - Longitudinal study - Other OBS: ___ - Experimental study - Controlled Trial - Challenge trial - Quasi-experiment - Other EXP:___ - Evaluation of a diagnostic tests - Molecular epidemiology - Molecular characterization - Qualitative research - Predictive model - Economic model - Risk assessment - Other: specify ____ | **Observational study:** Assignment of subjects into treated group versus a control group is outside the control of the investigator.  **Case series/report:**  an in depth evaluation of one or more cases and their clinical history/ risk factors.  **Population-based case series**: Often the findings of a disease surveillance program where the results represent disease in a geographical area.  **Cohort:** prospectively follow a group of exposed and non-exposed individuals to evaluate whether they develop an outcome or retrospectively evaluate exposure / disease when the exposure was likely to be a point source such as a foodborne outbreak at a wedding.  **Case control:** usually retrospective, identified cases are matched with controls and their risk factors are evaluated for an association with disease.  **Cross-sectional:** Examines the relationship of a risk factors and outcome (disease) at a point in time on a representative sample of the target population.  **Prevalence survey:** A measurement of the outcome (disease)at a point in time on a representative sample of the target population.  **Longitudinal study:** Multiple measurements taken on the same individuals over specific period of time  **Surveillance/Monitoring program results**: on-going sampling from a defined representative sample of the target population to evaluate changes over time.  **Controlled Trial**: experiments where the investigator has control over the experiment, they ideally randomize subjects into treated and non-treated groups and apply uniform measurements of the outcome.  **Challenge trial** is a controlled trial that includes exposure to the agent  **Molecular epidemiology** is a branch of **epidemiology** and medical science that focuses on the contribution of potential genetic and environmental risk factors, identified at the **molecular** level, to the etiology, distribution and prevention of disease within families and across populations  **Molecular characterisation of LACV** studies are examining genetic make-up of the virus and identifying key areas of conservation or mutation. This may lead to a description of how changes in phenotype are related to genotype. |
| **Sample Population** | | |
| What vector or host species were studied in this article? (Including the number and type of samples for humans)  *(Check all that apply)* | ** Humans**  **Samples taken to test for LACV**:   - - Blood   - Semen   - Urine   - Saliva   - CSF   - Other, please specify_____   - Questionnaire/focus group   **Characterize the human population (or case report) sampled for LACV, specify details as described in the paper.**   - General population: ___ - Hospital patient(s): ___ - Other human population:____   **LACV Co-infection specify: ________________**  **LACV Co-morbidity specify: ________________**  ** Other non-human host (reservoir) species _____**   - Species identified to be part of the sylvatic cycle. ___ - Species identified to be a dead end host. ___ - Species identified to suffer clinical disease from LACV infection.____ - **Animal model experimental species**: ________ - **Mosquitos, specify** - *Aedes triseriatus* - *Aedes albopictus* - *Aedes japonicus* - *Aedes Canadensis* - *Aedes communis* - *Aedes trivittatus* - *Culex pipiens* - Other mosquito: _____ - **Other arthropod vector: _____________________** - **Virus only studies using cell-cultures, in-vitro models** | Population sampled for LACV refers to the human population, **number sampled**, age range and any other important classifying characteristics such as identifying immunocompromised groups, co-infections & co-morbidities as specified by the author.  **General**: Most populations will fall under this category including confirmed and probable LACV cases  **Hospital:** Medical records, patients, most case reports (while the cases from case reports/series are not always hospitalized at the outset, the reports usually describe very severe cases that are eventually hospitalized)  **Other**: This is only for high risk groups or populations that are clearly not general (e.g. pregnant women, children, HIV+ etc.)  Indicate details on sylvatic hosts, dead end hosts and clinical disease in host as presented by the author. |
| **Pathogenesis- humans** | | |
| Reported signs and symptoms of human LACV infection.  (Format: +ve/N  /time units and comments)  *(Check all that apply/ can add new options to this question)* | - Fever, specify: ________ - Joint pain, specify: ________ - Headache, specify: ________ - Neurological symptoms, specify: _____ - Encephalopathy: ________ - Seizure: __________ - Vomiting: ___________ - Confusion: __________ - Other, please specify: ________ | When specifying, state the number of cases with symptom(s), number of total cases, and duration of time with units and further comments. Order should be (#/#/time + units/comments)  If duration of illness in many patients is provided, state the range and mention that “individual patient data is available”. |
| Indicate the results of post-mortem or other pathology examination*. For the scoping review only capture high level information e.g. what systems or organs were affected.* | ___TXT___ |  |
| How was LACV diagnosed in humans included in this study?  *(check all that apply/ can add new options to this question)* |  Based on clinical symptoms  Virus isolation  RT-PCR (reverse transcription PCR)   Serology   - IgG - IgM - Plaque reduction neutralization tests - Other, specify; ____    Molecular characterization   Other, specify: ______ | Note test name if a commercial test was used OR if there is an important detail about diagnosis that should be noted. |
| Are sequelae reported following LACV infection in humans?  (Format: symptom, #/#, duration + time units,  comments)  Were risk factors for experiencing the above mentioned conditions reported by the author, please specify details?  (format: description of the risk factor, # +ve/N and/or measure of association.) | _____TXT ______  _____TXT_____ | When specifying, state the symptom, number of cases with symptom(s)/ number of total cases, duration of symptom with time units and further comments. Order should be (symptom, #/#, duration + time units,  comments)  Risk factors may be descriptively described or quantitatively tested (e.g. odds ratios may be provided) Please extract both the description of the risk factor, # +ve/N and/or measure of association. |
| Characteristics of LACV infection in humans studied in this paper:  (Only answer if primary data is available) | - Time between exposure and viraemic period, please specify in days ______ - Viremic period, please specify in days: ___ - Intrinsic incubation period (IIP), please specify in days: ___ - Other ____ | **The intrinsic incubation period (IIP)** is the time between a human being becoming infected and the onset of symptoms due to the infection.  **Viraemic period** is the time period in which humans are infectious with LACV. |
| **Pathogenesis – all animals** | | |
| Describe the reported signs, symptoms and long term sequelae by animal species reported in the paper.  (Format: species; symptom, #/#, duration + time units,  comments) | __TXT___ | When specifying, state the number of positive LACV animals with symptom(s), number of total cases, and duration of time with units and further comments.  Also note long term sequelae.  If duration of illness in many cases is provided, state the range and mention that “individual case data is available”. |
| Indicate the results of post-mortem or other pathology examination*. For the scoping review only capture high level information e.g. what systems or organs were affected.* | ___TXT___ |  |
| How was LACV diagnosed in animals included in this study?  *(check all that apply)* |  Based on clinical symptoms  Virus isolation  RT-PCR (reverse transcription PCR)   Serology   - IgG - IgM - Plaque reduction neutralization tests - Other, specify; ____    Molecular characterization   Other, specify: ______ | Note test name if a commercial test was used OR if there is an important detail about diagnosis that should be noted. |
| Characteristics of LACV infection in animal hosts studied in this paper:  (Only answer if primary data is available) | - Time between exposure and viremic period, please specify in days ______ - Viremic period, please specify in days: ___ - Intrinsic incubation period (IIP), please specify in days: ___ - Other ____ | **The intrinsic incubation period (IIP)** is the time between a host being becoming infected and the onset of symptoms due to the infection.  **Viraemic period** is the time period in which a host is infectious with LACV. |
| **Infection mechanism** | | |
| List the host studied and briefly describe the objective/findings of the study relevant to the cellular level infection mechanism studied in this paper | __TXT___ |  |
| **Immune Response** | | |
| List the host studied and briefly describe the objective/findings of the study relevant to immune response (e.g. proteins, genes, receptors involved). | __TXT___ |  |
| **Treatment of LACV** | | |
| What treatment options were used to treat LACV infections?  Briefly specify the type of treatment/ name of drug/ dose and duration if reported in the paper. | - Human treatments: ____ - Animal treatments: _____ - In vitro antiviral experiment: ______ | e.g. Plant-based inhibitors, non-steriodal anti-inflammatory drugs, corticosteroids, analgesics /anti-pyretic, anti-viral drugs, physical therapy or acupuncture, traditional medicine, etc. |
| Was the above noted treatment(s) evaluated for efficacy?  (If there were more than one treatment and they were not all evaluated for efficacy, state which treatments were evaluated.) | - Yes: ____ - No |  |
| **Accuracy of Diagnostic Tests** | | |
| What tests were examined for their accuracy in the diagnosis of human cases and/or detection of LACV in non-human hosts?  *(Please check all that apply)* | - Clinical diagnosis (by signs and symptoms) - Virus culture and identification - Serological Tests   - IgG   - IgM   - Plaque reduction neutralization tests   - Other serological test, specify: ___ - Molecular Tests   - RT-PCR (reverse transcription PCR)   - Other molecular tests, specify: __ - Other, specify:___ | **Plaque reduction neutralization tests** measure neutralizing antibodies for LACV  **RT-PCR:** Used to qualitatively detect gene expression through creation of complementary DNA transcripts from RNA |
| Is information about sensitivity, specificity and/or raw data provided? | - Yes, specify the test(s): _____   **What data is available?**   - Specificity is provided - Sensitivity is provided - Raw data is provided (for 2 by 2 table) - Detection limits of test, - When should this test be used? (e.g. X days after symptoms appear) Specify: ____   **Is this a commercial test?**   - Yes - No, it an in house or experimental test - No, insufficient data provided | **Sensitivity** (also called the **true positive rate**) measures the proportion of positives that are correctly identified as such.  **Specificity** (also called the **true negative rate**) measures the proportion of negatives that are correctly identified as such. E.g., if 100 people known to have a disease were tested and 43 tested positive, the test has 43% sensitivity. If 100 people with no disease are tested and 96 return a negative result, then the test has **96%** specificity.  **Detection limits** – examples are cut off values for detecting positive or negative results for each test  If information about SN/SP/raw data/limitations of test, etc. is provided for more than one test, select “Yes, for multiple tests” and more questions will become available. |
| **Epidemiology Section** | | |
| What is the **burden** of LACV in the sample population in this study?  (Only answer if the data is a population sample.) | - The sample represents [ date/ region/ population] = ____________ - Sero-Prevalence= ____ - Case (disease) Prevalence = __________ - Incidence = ___ - Prevalence of Long-term sequelae = ____ - Case-fatality rate = ____ - Proportion hospitalized= ___ - Other measure ____ | **Sample:** describe what the sample represents – date, region, population sampled.  **Sero-prevalence:** Where a representative group of the target population is screened for sero-reactivity to LACV.  **Case Prevalence:** It is the number of cases of LACV in a defined population at a specific point in time. Record both numerator and denominator if provided [# of total LACV cases at a point in time, # of exposed individuals).  **Incidence:** It is the number of new cases of LACV arising within a given time period in a specified population. Record both numerator and denominator if provided [# of new LACV cases in a given time period, # of exposed individuals)  **Long-term sequalae:** Proportion of cases that develop chronic symptoms  **Case-fatality rate:** Proportion of cases that die from all LACV cases.  **Proportion** of cases that are **hospitalized**  **Other measures** e.g. prevalence of various co-infections or co-morbidities. |
| If this is a LACV **outbreak**, describe its characteristics  (Only answer if this is an outbreak report) |  Outbreak cases; total number reported:____   - Outbreak start date (yyyy/mm/dd): ____ - Outbreak finish date (yyyy/mm/dd): ____ - Number of confirmed cases:____ - Number of probable cases:____ - Number of hospitalizations: ___ - Number of fatalities: ____ - Other measures, ___ | **Confirmed cases** include all LACV cases that are laboratory confirmed.  **Probable cases** are cases that are clinically diagnosed without laboratory confirmation |
| If this report describes one or more **sporadic cases** of LACV, describe their characteristics.  (Only answer if this is a sporadic cases report OR a case report/case series etc.) | - Describe the cases [e.g. date/ region etc.] = ____________ - Sporadic cases; total number reported:____ - Number of confirmed cases:____ - Number of probable cases:____ - Other measures to note: ___ | **Sporadic cases** = When you see cases here and there. There is nothing linking one case to another. |
| What significant **risk factors** for exposure to LACV or acquiring LACV infection were identified?  State species: list significant risk factors by positive association and negative association with LACV infection.  (Only applies to epidemiology studies: surveys, cross sectional, case control, cohort. Not outbreak investigations) | ___TXT___ | The sample represents [ date/ region/ population] = ____________ |
| **Transmission of LACV** | | |
| What aspect of transmission is examined in this paper?  (List relevant outcomes in the textboxes and note species if several species are examined in the paper). | - Vector to human - Human to vector - Vector to host - Host to vector - Suitability of the vector - Vector competence ___ - Vector behaviour ___ - Other vector attribute: - Other: _____ | e.g. Time to transmission of virus. Vector life stage that transmission occurs, climatic factors (temp etc.) that impact transmission, etc.  **Vector competence** outcomes may include: lifespan/ life cycle, density, range of habitats, reproduction rages, time required from vector infection until the virus reaches their salivary glands.  Vector behaviour: includes feeding behaviour, biting conditions, biting rate, etc. |
| **Surveillance** | | |
| 33. What is the goal of the surveillance system/program? | Text box | Please copy and paste the goal of the surveillance system. For example, to identify the emergence of LACV in a host population |
| 34. Describe region under surveillance | Textbox | Describe area (i.e. urban/rural) and comment on scale of it (i.e. size of area sampled) |
| 35. When was the surveillance program initiated/finished? | Start date: (yyyy/mm/dd)  End date: (yyyy/mm/dd) | State NA if not provided. If it’s still on-going, write “on-going” in the end date section |
| 36. What surveillance methods are described?  *(Check all that apply)* |  Active   Monitoring program   Passive   Physician reporting___   Laboratory-based ___   Event-based ___   Other, specify: _____ | **Active surveillance**, in contrast to passive surveillance, requires that public health staff take direct action to collect disease information. For example, they may contact physicians, hospitals, laboratories, or other health entities to actively search for disease cases. Active surveillance may also occur through direct review of clinical or hospital charts, laboratory records, or emergency room patient logs. Active surveillance provides the most complete picture of disease incidence, i.e., cases are found in a timely manner, a greater number of cases are found, and more thorough information is obtained compared to passive surveillance methods. Active surveillance is an on-going activity and contains thresholds.  **Monitoring program:** Systematic purposeful program without active action plan. Simply counts numbers.  With **passive surveillance**, a member of the reporting community initiates a disease report that is communicated to a health department. For example, a physician may telephone a health department to discuss a case immediately upon seeing a patient with a suspected or confirmed case of a disease or an infection control practitioner may contact a health department upon receipt of positive laboratory results for a more common disease.  **Laboratory surveillance** differs from population-wide surveillance in that it can only monitor patients who are already receiving medical treatment and having lab tests done - does not identify patients who have never been tested.  **Event based surveillance** refers to the aggregation of data resulting from the monitoring of internet sources such as ProMed and GPHIN |
| **La Crosse encephalitis Virus Study** | | |
| This study examines LACV with the following goal:  Select the sub-category that the study best fits into and describe the objective/outcome of the study. | - Pathogenesis of LACV - LACV transmission characteristics - Molecular characterization of LACV | Please indicate the objective/outcomes of the study under the appropriate category.  **Pathogenesis**: A virus study on pathogenesis will look at virus factors that can up or down regulate / manage virus replication etc. to successfully cause infection/disease in the host.  **Transmission characteristics** are receptors etc. on the virus that are necessary for LACV to move from one host to another.  **Molecular characterisation of LACV** studies are examining genetic make-up of the virus and identifying key areas of conservation or mutation. This may lead to a description of how changes in phenotype are related to genotype. |
| Is this a molecular epidemiology study?  (*Appears here and under the epidemiology section)* | - Yes, provide details of findings __________ - No | **Molecular epidemiology** is a branch of **epidemiology** and medical science that focuses on the contribution of potential genetic and environmental risk factors, identified at the **molecular** level, to the etiology, distribution and prevention of disease within families and across populations |
| **Mitigation Strategies** | | |
| What prevention/control strategies were investigated?  (Please check all that apply)  Please provide details on the mitigation strategy and include the name of any included chemicals | - Human behavioural protective measures: - Wearing long pants and/or lightly-coloured clothing - Tucking pants into socks - Using repellents; please specify ___ - Wearing clothing treated with permethrin insecticide - Using bed nets - Having window/door screens - Emptying standing water from containers such as flowerpots or buckets and cleaning them - Removing/destroying vector habitats (e.g. containers/tires) - Other behavioural measure, _____ - Intervention for blood supply: ____ - Vaccination - Landscape modification: ______ - Chemical control measures: - Insecticides_____ - Other chemical control measures: _____ - Biologic control of vector: _____ - Public education: _____ - Other mitigation: _____ | **PPMs**  Are behaviours that may reduce the risk of contact with a tick or exposure to LACV or development of disease from LACV. This may include protective clothing, repellents, barriers between the home and outside, destruction of tick habitat close to home.  Other interventions may include:   - Protection of the blood supply - Vaccination (none are known) - Landscape modification (frequent mowing, branch trimming, leaf litter clearing, removal of bird feeders, fencing to keep deer out, and use of mulch or gravel as a dry barrier between lawn and woods. - biological control (exposing ticks to *H. hookeri*, fungi, nematodes and viruses)   Public education to decrease the risk of tick contact for humans and companion animals. |
| Did the authors describe the impact of the mitigation strategy? | - Successes/positive impact: ______ - Limitation/negative impact: ______ - Not discussed | Briefly highlight the findings of the evaluation under successes and limitations. |
| **Social Impact** | | |
| Did the paper investigate knowledge and attitudes and/or risk perceptions towards LACV and potential prevention and control strategies?  (please check all that apply) | - Yes, **concerns** about toxic or environmental effects of control measures (e.g. DEET) - Yes, **perceptions** about the severity of LACV or vulnerabilities - Yes, **perceived** efficacy of protective measures - Yes, **knowledge** on behavioural mitigation practices - Yes, **knowledge** on LACV disease - Yes, **knowledge** on LACV harbouring vectors - Yes, **public attitudes** towards paying for protection from LACV (willingness to pay) - Yes, other: __________ |  |
| This paper is focused on LACV. | - Yes, the data in this paper is specific to LACV - No, this paper more broadly refers to tick-borne (or other vector-borne) diseases |  |
| What specific populations were investigated for contextual information?  *(please check all that apply)* | - General public - Physicians - Other medical or public health professionals, please specify:________ - Government personnel, please specify ____ - NGO personnel, please specify ___ - Other, please specify _____ | What populations did the researchers speak to? Gather information from? |
| **Economic Burden** | | |
| Does the article report on the economic burden of LACV disease or cost-benefit of control measures?  *Specify description of outcomes available in the paper under the appropriate category.*  (Check all that apply) | - Yes, economic burden - Yes, cost-benefit of control measures - Yes, Other economic measure - No data is reported in the paper although economics is discussed |  |
| **Predictive Model for LACV** | | |
| Does this predictive model include Canada or at least the USA? | - Yes, Canada - Yes, USA but not Canada - No |  |
| Does the model include predictions under different climate change scenarios, to explore the impact of spread or emergence of LACV in the future? | - Yes, climate change scenarios are explored - No, the model is built upon current climate parameters - No, other. Explain _________ |  |
| **Other LACV topics** | | |
| Describe the LACV topic discussed in the research article that doesn't fit into the previous categories. | ___TXT__ |  |
| **Final Section** | | |
| Indicate the type of LACV isolated or used in this study as described by the author. | - LACV description _______ - LACV not typed (e.g. serology) - LACV not isolated and serology not conducted - Other, explain _____ | In option 1 indicate the name of the virus isolate as reported.  Option 2 is where serology classified samples as positive or negative only. |
| Does the article investigate or discuss the potential impacts of climate change on LACV? | - Yes - No | If the impacts of climate change are investigated as part of the study or are discussed in the discussion based upon the research findings, check yes to this question. |
| Is there sufficient extractable data in this paper to proceed to quality assessment and further data extraction? | - Yes - No | Quick QA on whether study is worth progressing to QA/DE levels and more in depth analysis. |
| Additional comments: Are there any important details that you believe were not extracted? | __TXT___ |  |

Articles will be double extracted in Distiller SR.

# S2: Included References in Alphabetical Order

(1) Abuhammour W. Severe La Crosse meningoencephalitis in children: Report of two cases. Journal of Pediatric Neurology 2005; 3(2): 109-112.

(2) Adjemian J, et al. Zoonotic infections among employees from Great Smoky Mountains and Rocky Mountain National Parks, 2008-2009. Vector Borne and Zoonotic Diseases 2012; 12(11): 922-931.

(3) Akashi H, Bishof DHL. Comparison of the sequences and coding of La Crosse and snowshoe hare bunyavirus S RNA species. Journal of virology 1983; 45(3): 1155-1158.

(4) Alabama Department of Public Health. Annual Report 2000. Alabama Department of Public Health; 2000.

(5) Alabama Department of Public Health. Annual Report 2001. Alabama Department of Public Health; 2001.

(6) Alabama Department of Public Health. Annual Report 2005. Alabama Department of Public Health; 2005.

(7) Amundson TE, The role of medium-sized wild mammals in the epizootiology of La Crosse virus and other selected microbial pathogens; 1980.

(8) Anderson J, Akkina R. CXCR4 and CCR5 shRNA transgenic CD34+ cell derived macrophages are functionally normal and resist HIV-1 infection. Retrovirology 2005; 2: 53.

(9) Andre RG, et al. Surveillance of arbovirus activity in Iowa, USA, 1978-1980. Journal of medical entomology 1985; 22(1): 58-63.

(10) Armstrong PM, Andreadis TG. A new genetic variant of La Crosse virus (Bunyaviridae) isolated from New England. American Journal of Tropical Medicine and Hygiene 2006; 75(3): 491-496.

(11) Artsob H, Spence LP, Th'ng C. Enzyme-linked immunosorbent assay typing of California serogroup viruses isolated in Canada. Journal of clinical microbiology 1984; 20(2): 276-280.

(12) Baldridge GD, Beaty BJ, Hewlett MJ. Genomic stability of La Crosse virus during vertical and horizontal transmission. Archives of Virology 1989; 108(1-2): 89-99.

(13) Balfour HH, Jr. California (La Crosse virus) encephalitis in Minnesota. Minnesota medicine 1974; 57(11): 876-881.

(14) Balfour HH, Jr., Edelman CK. Diagnosis of California (La Crosse) encephalitis by precipitin techniques: a prospective study. Applied Microbiology 1974; 28(5): 807-810.

(15) Balfour HH, Jr,, et al. California arbovirus (La Crosse) infections. III. Epidemiology of California encephalitis in Minnesota. Journal of Infectious Diseases 1976; 133(3): 293-301.

(16) Balfour HH, Jr., et al. Isolates of California encephalitis (La Crosse) virus from field-collected eggs and larvae of Aedes triseriatus: identification of the overwintering site of California encephalitis. The Journal of infectious diseases 1975; 131(6): 712-716.

(17) Balfour HH, Jr., et al. California arbovirus (La Crosse) infections. I. Clinical and laboratory findings in 66 children with meningoencephalitis. Pediatrics 1973; 52(5): 680-691.

(18) Balkhy HH, Schreiber JR. Severe La Crosse encephalitis with significant neurologic sequelae. Pediatric Infectious Disease Journal 2000; 19(1): 77-80.

(19) Banes AJ, Coleman PH. La Crosse virus production and export have a colchicine-sensitive step. Cell biology international reports 1980; 4(12): 1117-1123.

(20) Bara JJ, Muturi EJ. Effect of mixed infections of Sindbis and La Crosse viruses on replication of each virus in vitro. Acta Tropica 2014; 130: 71-75.

(21) Bara JJ, Muturi EJ. Container type influences the relative abundance, body size, and susceptibility of Ochlerotatus triseriatus (Diptera: Culicidae) to La Crosse virus. Journal of medical entomology 2015; 52(3): 452-460.

(22) Bara JJ, Parker AT, Muturi EJ. Comparative Susceptibility of Ochlerotatus japonicus, Ochlerotatus triseriatus, Aedes albopictus, and Aedes aegypti (Diptera: Culicidae) to La Crosse Virus. Journal of medical entomology 2016; 53(6): 1415-1421.

(23) Barker CM, et al. Habitat preferences and phenology of Ochlerotatus triseriatus and Aedes albopictus (Diptera: Culicidae) in Southwestern Virginia. Journal of medical entomology 2003; 40(4): 403-410.

(24) Beaty BJ, et al. Interference between bunyaviruses in Aedes triseriatus mosquitoes. Virology 1983; 127(1): 83-90.

(25) Beaty BJ, et al. Indirect fluorescent-antibody technique for serological diagnosis of La Crosse (California) virus infections. Journal of clinical microbiology 1982; 15(3): 429-434.

(26) Beaty BJ, et al. Detection of La Crosse (California encephalitis) virus antigen in mouse skin samples. American Journal of Veterinary Research 1982; 43(4): 684-687.

(27) Beaty BJ, et al. Molecular basis of bunyavirus transmission by mosquitoes: role of the middle-sized RNA segment. Science, USA 1981; 211(4489): 1433-1435.

(28) Beaty BJ, et al. Rapid diagnosis of La Crosse virus infections: evaluation of serologic and antigen detection techniques for the clinically relevant diagnosis of La Crosse encephalitis. Progress in clinical and biological research 1983; 123: 293-302.

(29) Beaty BJ, et al. Molecular basis of bunyavirus per os infection of mosquitoes: role of the middle-sized RNA segment. Proceedings of the National Academy of Sciences, USA 1982; 79(4): 1295-1297.

(30) Beaty BJ, et al. Formation of reassortant bunyaviruses in dually infected mosquitoes. Virology; 1981, recd 1983; 111(2): 662-665.

(31) Beaty BJ, et al. Evolution of bunyaviruses by genome reassortment in dually infected mosquitoes (Aedes triseriatus). Science 1985; 230(4725): 548-550.

(32) Beaty BJ, Thompson WH. Emergence of La Crosse virus from endemic foci. Fluorescent antibody studies of overwintered Aedes triseriatus. American Journal of Tropical Medicine and Hygiene 1975; 24(4): 685-691.

(33) Beaty BJ, Thompson WH. Delineation of La Crosse virus in developmental stages of transovarially infected Aedes triseriatus. American Journal of Tropical Medicine and Hygiene 1976; 25(3): 505-512.

(34) Beaty BJ, Thompson WH. Tropisms of La Crosse virus in Aedes triseriatus (Diptera: Culicidae) following infective blood meals. Journal of medical entomology 1978; 14(5): 499-503.

(35) Bellocq C, et al. Translational requirement of La Crosse virus S-mRNA synthesis: In vitro studies. Journal of virology 1987; 61(1): 87-95.

(36) Belloncik S, et al. Activity of California encephalitis group viruses in Entrelacs (province of Quebec, Canada). Canadian journal of microbiology 1982; 28(6): 572-579.

(37) Bennett RS, et al. La Crosse virus infectivity, pathogenesis, and immunogenicity in mice and monkeys. Virology Journal; 2008 2008; 5(25).

(38) Bennett RS, et al. A recombinant chimeric la crosse virus expressing the surface glycoproteins of Jamestown canyon virus is immunogenic and protective against challenge with either parental virus in mice or monkeys. Journal of virology 2012; 86(1): 420-426.

(39) Bennett RS, et al. Genome sequence analysis of La Crosse virus and in vitro and in vivo phenotypes. Virology Journal 2007; 4.

(40) Berry RL. LaCrosse encephalitis surveillance in Ohio. New Jersey Mosquito Control Association, Inc New Jersey, 1984.

(41) Berry RL, et al. Isolation of LaCrosse virus (California encephalitis group) from field collected Aedes triseriatus (Say) larvae in Ohio (Diptera: Culicidae). Mosquito News 1974; 34(4): 454-457.

(42) Berry RL, et al. Studies on the epidemiology of California encephalitis in an endemic area in Ohio in 1971. American Journal of Tropical Medicine and Hygiene 1975; 24(6): 992-998.

(43) Berry RL, et al. Aedes canadensis, a vector of La Crosse virus (California serogroup) in Ohio. Journal of the American Mosquito Control Association 1986; 2(1): 73-78.

(44) Bevins SN. Invasive mosquitoes, larval competition, and indirect effects on the vector competence of native mosquito species (Diptera: Culicidae). Biological Invasions 2008; 10(7): 1109-1117.

(45) Bice T, Richards K, Aris R. A rare cause of altered mental status in a 95 year-old patient. American Thoracic Society International Conference, ATS 2013 Philadelphia, PA United States 2013; 187: A2963.

(46) Black Iv WC, et al. Patterns of variation in the inhibitor of apoptosis 1 gene of Aedes triseriatus, a transovarial vector of la Crosse virus. Journal of Molecular Evolution 2009; 68(4): 403-413.

(47) Black SS, et al. Necrotizing panencephalitis in puppies infected with La Crosse virus. Journal of veterinary diagnostic investigation : official publication of the American Association of Veterinary Laboratory Diagnosticians, Inc 1994; 6(2): 250-254.

(48) Black WC, et al. Typing of LaCrosse, snowshoe hare, and Tahyna viruses by analyses of single-strand conformation polymorphisms of the small RNA segments. Journal of clinical microbiology 1995; 33(12): 3179-3182.

(49) Blakqori G, et al. La Crosse bunyavirus nonstructural protein NSs serves to suppress the type I interferon system of mammalian hosts. Journal of virology 2007; 81(10): 4991-4999.

(50) Blakqori G, et al. Functional L polymerase of La Crosse virus allows in vivo reconstitution of recombinant nucleocapsids. Journal of General Virology 2003; 84(5): 1207-1214.

(51) Blakqori G, Weber F. Efficient cDNA-based rescue of La crosse bunyaviruses expressing or lacking the nonstructural protein NSs. Journal of virology 2005; 79(16): 10420-10428.

(52) Boromisa RD, Grimstad PR. Seroconversion rates to Jamestown Canyon virus among six populations of white-tailed deer (Odocoileus virginianus) in Indiana. Journal of wildlife diseases 1987; 23(1): 23-33.

(53) Borucki MK, The evolutionary potential of La Crosse virus Colorado, USA: Colorado State University 1998. 0946 pp.

(54) Borucki MK, et al. Bunyavirus superinfection and segment reassortment in transovarially infected mosquitoes. Journal of General Virology 1999; 80(12): 3173-3179.

(55) Borucki MK, et al. The effect of mosquito passage on the La Crosse virus genotype. Journal of General Virology 2001; 82(12): 2919-2926.

(56) Boyce TG, et al. Fever and encephalopathy in two school age boys. Pediatric Infectious Disease Journal 1998; 17(10): 935, 939-940.

(57) Boyd KR, Kokernot RH, Sullivan PS. California group arbovirus activity in southeast Texas. Texas Reports on Biology and Medicine; 1976, recd 1978; 34(2/4): 245-255.

(58) Brackney DE, et al. C6/36 Aedes albopictus cells have a dysfunctional antiviral RNA interference response. PLoS Neglected Tropical Diseases 2010; 4(10): e856.

(59) Bupp K, Stillmock K, González-Scarano F. Analysis of the intracellular transport properties of recombinant La Crosse virus glycoproteins. Virology 1996; 220(2): 485-490.

(60) Cabradilla CD, Jr., Holloway BP, Obijeski JF. Molecular cloning and sequencing of the La Crosse virus S RNA. Virology 1983; 128(2): 463-468.

(61) Calisher CH, Bailey RE. Serodiagnosis of La Crosse virus infections in humans. Journal of clinical microbiology 1981; 13(2): 344-350.

(62) Calisher CH, et al. Serodiagnosis of La Crosse virus infections in humans by detection of immunoglobulin M class antibodies. Journal of clinical microbiology 1986; 23(4): 667-671.

(63) Camille Harris M, et al. La crosse virus field detection and vector competence of culex mosquitoes. American Journal of Tropical Medicine and Hygiene 2015; 93(3): 461-467.

(64) Campbell GL, et al. Prevalence of neutralizing antibodies against California and Bunyamwera serogroup viruses in deer from mountainous areas of California. American Journal of Tropical Medicine and Hygiene 1989; 40(4): 428-437.

(65) Campbell WP, Huang C. Detection of California serogroup Bunyaviruses in tissue culture and mosquito pools by PCR. Journal of virological methods 1996; 57(2): 175-179.

(66) Case KL, West RM, Smith MJ. Histocompatibility antigens and La Crosse encephalitis. Journal of Infectious Diseases 1993; 168(2): 358-360.

(67) Cash P. Inhibition of La Crosse virus replication by monensin, monovalent ionophore. The Journal of general virology 1982; 59(Pt 1): 193-196.

(68) Cassidy LF, Patterson JL. Mechanism of La Crosse virus inhibition by ribavirin. Antimicrobial Agents and Chemotherapy 1989; 33(11): 2009-2011.

(69) Centers for Disease Control. Arboviral Infections of the Central Nervous System—United States, 1987. JAMA: The Journal of the American Medical Association 1988; 260(12): 1688-1694.

(70) Centers for Disease Control. La Crosse encephalitis in West Virginia. Morbidity and mortality weekly report 1988; 37(5): 79-82.

(71) Centers for Disease Control. Arboviral disease - United States, 1991. Journal of the American Medical Association 1992; 268(11): 1399.

(72) Centers for Disease Control. La Crosse virus neuroinvasive disease - Missouri, 2009. Morbidity and mortality weekly report 2010; 59(28): 869-871.

(73) Centers for Disease Control. West nile virus disease and other arboviral diseases - United States, 2011. Morbidity and mortality weekly report 2012; 61(27): 510-514.

(74) Centers for Disease Control. West Nile virus and other arboviral diseases--United States, 2012. Morbidity and mortality weekly report 2013; 62(25): 513-517.

(75) La Crosse virus disease cases reported to CDC by state, 2004–2013 (https://www.cdc.gov/lac/resources/LACbystate-table_2004-2013.pdf). Accessed December 17, 2016.

(76) Chandler LJ, et al. Heterologous reassortment of bunyaviruses in Aedes triseriatus mosquitoes and transovarial and oral transmission of newly evolved genotypes. Journal of General Virology 1990; 71(5): 1045-1050.

(77) Chandler LJ, et al. Detection of La Crosse and snowshoe hare viral nucleic acids by in situ hybridization. American Journal of Tropical Medicine and Hygiene 1989; 40(5): 561-568.

(78) Chandler LJ, Blair CD, Beaty BJ. La Crosse virus infection of Aedes triseriatus (Diptera: Culicidae) ovaries before dissemination of virus from the midgut. Journal of medical entomology 1998; 35(4): 567-572.

(79) Chandler LJ, et al. Characterization of La Crosse virus RNA in autopsied central nervous system tissues. Journal of clinical microbiology 1998; 36(11): 3332-3336.

(80) Chandler LJ, et al. Reassortment of La Crosse and Tahyna bunyaviruses in Aedes triseriatus mosquitoes. Virus research 1991; 20(2): 181-191.

(81) Chandler LJ, et al. Analysis of La Crosse virus S-segment RNA and its positive-sense transcripts in persistently infected mosquito tissues. Journal of virology 1996; 70(12): 8972-8976.

(82) Chappell WA, et al. Preparation of La Crosse virus hemagglutinating antigen in BHK-21 suspension cell cultures. Applied Microbiology 1969; 18(3): 433-437.

(83) Chare ER, Gould EA, Holmes EC. Phylogenetic analysis reveals a low rate of homologous recombination in negative-sense RNA viruses. Journal of General Virology 2003; 84(10): 2691-2703.

(84) Cheng LL, et al. Potential for evolution of California serogroup bunyaviruses by genome reassortment in Aedes albopictus. American Journal of Tropical Medicine and Hygiene 1999; 60(3): 430-438.

(85) Cheng LL, et al. Identification and localization of conserved antigenic epitopes on the G2 proteins of California serogroup Bunyaviruses. Viral immunology 2000; 13(2): 201-213.

(86) Chun RW. Clinical aspects of La Crosse encephalitis: neurological and psychological sequelae. Progress in clinical and biological research 1983; 123: 193-201.

(87) Cierzniewski A, et al. 2009 Indiana Report of Infectious Diseases. Indiana State Department of Health; 2009.

(88) Clark GG, Crabbs CL, Elias BT. Absence of La Crosse virus in the presence of Aedes triseriatus on the Delmarva Peninsula. Journal of the American Mosquito Control Association 1986; 2(1): 33-37.

(89) Clark GG, et al. Occurrence of La Crosse (California serogroup) encephalitis viral infections in Illinois. American Journal of Tropical Medicine and Hygiene 1983; 32(4): 838-843.

(90) Clark GG, et al. Persistance of La Crosse virus (California encephalitis serogroup) in north-central Illinois. American Journal of Tropical Medicine and Hygiene 1983; 32(1): 175-184.

(91) Clark GG, et al. Lacrosse virus activity in Illinois detected by ovitraps. Mosquito News 1982; 42(4): 551-557.

(92) Clerx-Van Haaster C, Bishop DHL. Analyses of the 3'-terminal sequences of snowshoe hare and La Crosse bunyaviruses. Virology 1980; 105(2): 564-574.

(93) Clerx-van Haaster CM, et al. Nucleotide sequence analyses and predicted coding of bunyavirus genome RNA species. Journal of virology 1982; 41(1): 119-128.

(94) Clewley J, Gentsch J, Bishop DHL. Three unique viral RNA species of snowshoe hare and La Crosse bunyaviruses. Journal of virology 1977; 22(2): 459-468.

(95) Connor JH, et al. Antiviral activity and RNA polymerase degradation following Hsp90 inhibition in a range of negative strand viruses. Virology 2007; 362(1): 109-119.

(96) Cooper SR, Lindsey T, Craig AS. Communicable and Environmental Disease Services Annual Report 2004-2005. Tennessee Department of Health, Communicable and Environmental Disease Services Section; 2005.

(97) Cooper SR, Taylor CR, Craig AS. Communicable and Environmental Disease Services Annual Report 2006. Tennessee Department of Health, Communicable and Environmental Disease Services; 2006.

(98) Cooper SR, et al. Communicable and Environmental Disease Services Annual Report 2007. Tennessee Department of Health, Communicable and Environmental Disease Services; 2007.

(99) Cooper SR, Taylor CR, Jones TF. Communicable and Environmental Disease Services Annual Report 2008. Tennessee Department of Health, Communicable and Environmental Disease Services Section; 2008.

(100) Cooper SR, Taylor CR, Jones TF. Communicable and Environmental Disease Services Annual Report 2009. Tennessee Department of Health, Communicable and Environmental Disease Services Section; 2009.

(101) Copps SC, Elston AC. California virus (La Crosse strain) encephalitis. Wisconsin medical journal 1969; 68(11): 329-331.

(102) Costanzo KS, et al. Effect of oral infection of La Crosse virus on survival and fecundity of native Ochlerotatus triseriatus and invasive Stegomyia albopicta. Medical and veterinary entomology 2014; 28(1): 77-84.

(103) Cully JF, Jr, et al. Antibodies to La Crosse virus in eastern chipmunks in Indiana near an Aedes albopictus population. Journal of the American Mosquito Control Association 1991; 7(4): 651-653.

(104) Cully JF, Jr, Streit TG, Heard PB. Transmission of La Crosse virus by four strains of Aedes albopictus to and from the eastern chipmunk (Tamias striatus). Journal of the American Mosquito Control Association 1992; 8(3): 237-240.

(105) Dahlberg JE, Obijeski JF, Korb J. Electron microscopy of the segmented RNA genome ofLa Crosse virus: absence of circular molecules. Journal of virology 1977; 22(1): 203-209.

(106) de los Reyes EC, et al. Periodic lateralized epileptiform discharges in La Crosse encephalitis, a worrisome subgroup: Clinical presentation, electroencephalogram (EEG) patterns, and long-term neurologic outcome. Journal of child neurology 2008; 23(2): 167-172.

(107) Delhaye S, et al. Neurons produce type I interferon during viral encephalitis. Proceedings of the National Academy of Sciences of the United States of America 2006; 103(20): 7835-7840.

(108) Dobie DK, et al. Analysis of LaCrosse virus S mRNA 5' termini in infected mosquito cells and Aedes triseriatus mosquitoes. Journal of virology 1997; 71(6): 4395-4399.

(109) Dressler RL, et al. Serum antibody prevalence for Herpesvirus sylvilagus, Bacillus piliformis and California serogroup arboviruses in cottontail rabbits from Pennsylvania. Journal of wildlife diseases 1988; 24(2): 352-355.

(110) Dreyzehner J, Reagan D, Jones TF. Communicable and Environmental Disease Services Annual Report 2010-2012. Tennessee Department of Health, Communicable and Environmental Disease Services Section; 2012.

(111) Dykers TI, et al. Rapid diagnosis of LaCrosse encephalitis: Detection of specific immunoglobulin M in cerebrospinal fluid. Journal of clinical microbiology 1985; 22(5): 740-744.

(112) Eastep NE, Albert RE, Anderson JR. Modulation of La Crosse virus infection in Aedes albopictus mosquitoes following larval exposure to coffee extracts. Frontiers in Physiology 2012; 3: 66.

(113) Edwards JF, et al. Ovine fetal malformations induced by in utero inoculation with Main Drain, San Angelo, and LaCrosse viruses. American Journal of Tropical Medicine and Hygiene 1997; 56(2): 171-176.

(114) El Said LH, et al. A comparison of La Crosse virus isolated obtained from different ecological niches and an analysis of the structural components of California encephalitis serogroup viruses and other bunyaviruses. The American Journal of Tropical Medicine and Hygiene 1979; 28(2): 364-386.

(115) Endres MJ, et al. The large viral RNA segment of California serogroup bunyaviruses encodes the large viral protein. Journal of General Virology 1989; 70(1): 223-228.

(116) Erwin PC, et al. La Crosse encephalitis in Eastern Tennessee: clinical, environmental, and entomological characteristics from a blinded cohort study. American Journal of Epidemiology 2002; 155(11): 1060-1065.

(117) Florida Health. Human Arboviral Disease Cases Reported by Florida 2014-2015. Florida Health; 2016.

(118) Fredia S, et al. Communicable and Environmental Disease Services Annual Report 2001. Tennessee Department of Health, Communicable and Environmental Disease Services 2001.

(119) Freier JE, Beier JC. Oral and transovarial transmission of La Crosse virus by Aedes atropalpus. American Journal of Tropical Medicine and Hygiene 1984; 33(4): 708-714.

(120) Frese M, et al. Inhibition of bunyaviruses, phleboviruses, and hantaviruses by human MxA protein. Journal of virology 1996; 70(2): 915-923.

(121) Freyman K, et al. Environmental investigation following a la crosse encephalitis case fatality in tennessee, 2012. American Journal of Tropical Medicine and Hygiene Conference: 62nd Annual Meeting of the American Society of Tropical Medicine and Hygiene, ASTMH 2012Washington, DC United States 2013; 89(5): 412.

(122) Fuller F, Bishop DH. Identification of virus-coded nonstructural polypeptides in bunyavirus-infected cells. Journal of virology 1982; 41(2): 643-648.

(123) Gabel J, Feldpausch A, Kelly R. Summary of Human West Nile Virus and Other Arboviral Infections, Georgia 2014. . Georgia Department of Public Health; 2014.

(124) Gabel J, Ivey M, Kelly R. Summary of Human West Nile Virus and Other Arboviral Infections, Georgia 2010; 2010.

(125) Gabel J, Ivey M, Kelly R. Summary of Human West Nile Virus and Other Arboviral Infections, Georgia 2011. Georgia Department of Public Health; 2012.

(126) Gabel J, Ivey M, Kelly R. Summary of Human West Nile Virus and Other Arboviral Infections, Georgia 2013. Georgia Department of Public Health; 2014.

(127) Gabitzsch ES, Blair CD, Beaty BJ. Effect of La Crosse virus infection on insemination rates in female Aedes triseriatus (Diptera: Culicidae). Journal of medical entomology 2006; 43(5): 850-852.

(128) Gaensbauer JT, et al. Neuroinvasive arboviral disease in the United States: 2003 to 2012. Pediatrics 2014; 134(3): e642-e650.

(129) Gauld LW, et al. Observations on a natural cycle of La Crosse virus (California group) in southwestern Wisconsin. American Journal of Tropical Medicine and Hygiene 1974; 23(5): 983-992.

(130) Gauld LW, McMillan BC, Sinha SK. Relationship of California group virus infection and mental retardation: seroepidemiological observations. Journal of mental deficiency research 1979; 23(1): 63-68.

(131) Gauld LW, et al. Isolation of La Crosse virus (California encephalitis group) from the chipmunk (Tamias striatus), an amplifier host. American Journal of Tropical Medicine and Hygiene 1975; 24(6): 999-1005.

(132) Gentsch J, Bishop DH, Obijeski JF. The virus particle nucleic acids and proteins of four bunyaviruses. The Journal of general virology 1977; 34(2): 257-268.

(133) Gentsch J, et al. Formation of recombinants between snowshoe hare and La Crosse bunyaviruses. Journal of virology 1977; 24(3): 893-902.

(134) Gentsch JR, Bishop DHL. Small viral RNA segment of bunyaviruses codes for viral nucleocapsid protein. Journal of virology 1978; 28(1): 417-419.

(135) Gentsch JR, Bishop DL. M viral RNA segment of bunyaviruses codes for two glycoproteins, G1 and G2. Journal of virology 1979; 30(3): 767-770.

(136) Gentsch JR, Robeson G, Bishop DH. Recombination between snowhoe hare and La Crosse bunyaviruses. Journal of virology 1979; 31(3): 707-717.

(137) Gentsch JR, et al. Evidence from recombinant bunyavirus studies that the M RNA gene products elicit neutralizing antibodies. Virology 1980; 102(1): 190-204.

(138) Gerhardt RR, et al. First isolation of La Crosse virus from naturally infected Aedes albopictus. Emerging Infectious Diseases 2001; 7(5): 807-811.

(139) Gerlach P, et al. Structural insights into bunyavirus replication and its regulation by the vRNA promoter. Cell (Cambridge) 2015; 161(6): 1267-1279.

(140) Glaser RL, Meola MA. The native Wolbachia endosymbionts of Drosophila melanogaster and Culex quinquefasciatus increase host resistance to West Nile virus infection. PLoS ONE 2010; 5(8): e11977.

(141) Godsey MS, Jr, et al. California serogroup virus infections in Wisconsin domestic animals. American Journal of Tropical Medicine and Hygiene 1988; 39(4): 409-416.

(142) Gonzalez-Hernandez MJ, et al. Chemical derivatives of a small molecule deubiquitinase inhibitor have antiviral activity against several RNA viruses. PloS one 2014; 9(4): e94491.

(143) Gonzalez-Scarano F, et al. An avirulent G1 glycoprotein variant of La Crosse Bunyavirus with defective fusion function. Journal of virology 1985; 54(3): 757-763.

(144) Gonzalez-Scarano F, Pobjecky N, Nathanson N. La crosse bunyavirus can mediate pH-dependent fusion from without. Virology 1984; 132(1): 222-225.

(145) Gonzalez-Scarano F, et al. Monoclonal antibodies against the G1 and nucleocapsid proteins of LaCrosse and Tahyna viruses. Progress in clinical and biological research 1983; 123: 145-156.

(146) Gottfried KL, et al. Temporal abundance, parity, survival rates, and arbovirus isolation of field-collected container-inhabiting mosquitoes in eastern Tennessee. Journal of the American Mosquito Control Association 2002; 18(3): 164-172.

(147) Gowen BB, et al. In vitro and in vivo activities of T-705 against arenavirus and bunyavirus infections. Antimicrobial Agents and Chemotherapy 2007; 51(9): 3168-3176.

(148) Grady LJ, Kinch W. Two monoclonal antibodies against La Crosse virus show host-dependent neutralizing activity. Journal of General Virology 1985; 66(12): 2773-2776.

(149) Grady LJ, Sanders ML, Campbell WP. Evidence for three separate antigenic sites on the G1 protein of La crosse virus. Virology 1983; 126(1): 395-397.

(150) Grady LJ, Sanders ML, Campbell WP. The sequence of the M RNA of an isolate of La Crosse virus. The Journal of general virology 1987; 68 ( Pt 12)(Pt 12): 3057-3071.

(151) Grady LJ, et al. Monoclonal antibodies agains La Crosse virus. Journal of General Virology 1983; 64(8): 1699-1704.

(152) Graham DH, et al. Quantitative trait loci conditioning transovarial transmission of La Crosse virus in the eastern treehole mosquito, Ochlerotatus triseriatus. Insect molecular biology 2003; 12(4): 307-318.

(153) Graham DH, et al. Selection of refractory and permissive strains of Aedes triseriatus (Diptera: Culicidae) for transovarial transmission of La Crosse virus. Journal of medical entomology 1999; 36(6).

(154) Grimstad PR, et al. Production and use of a hemagglutinin for detecting antibody to Jamestown Canyon virus. Journal of clinical microbiology 1987; 25(8): 1557-1559.

(155) Grimstad PR, et al. Serologic evidence for widespread infection with la crosse and St. Louis encephalitis viruses in the Indiana human population. American Journal of Epidemiology 1984; 119(6): 913-930.

(156) Grimstad PR, et al. Aedes triseriatus and La Crosse virus: geographic variation in vector susceptibility and ability to transmit. American Journal of Tropical Medicine and Hygiene 1977; 26(5): 990-996.

(157) Grimstad PR, Haramis LD. Evaluation of immunofluorescence and cell culture techniques for detecting La Crosse virus infection in individual Aedes triseriatus (Diptera: Culicidae). Journal of medical entomology 1983; 20(4): 458-460.

(158) Grimstad PR, Haramis LD. Aedes triseriatus (Diptera: Culicidae) and La Crosse virus. III. Enhanced oral transmission by nutrition-deprived mosquitoes. Journal of medical entomology 1984; 21(3): 249-256.

(159) Grimstad PR, et al. Recently introduced Aedes albopictus in the United States: potential vector of La Crosse virus (Bunyaviridae: California serogroup). Journal of the American Mosquito Control Association 1989; 5(3): 422-427.

(160) Grimstad PR, Paulson SL, Craig GB, Jr. Vector competence of Aedes hendersoni (Diptera: Culicidae) for La Crosse virus and evidence of a salivary-gland escape barrier. Journal of medical entomology 1985; 22(4): 447-453.

(161) Grimstad PR, et al. Aedes triseriatus (Diptera: Culicidae) and La Crosse virus. II. Modification of mosquito feeding behavior by virus infection. Journal of medical entomology 1980; 17(1): 1-7.

(162) Grimstad PR, Schmitt SM, Williams DG. Prevalence of neutralizing antibody to Jamestown Canyon virus (California group) in populations of elk and moose in northern Michigan and Ontario, Canada. Journal of wildlife diseases 1986; 22(4): 453-458.

(163) Grimstad PR, Walker ED. Aedes triseriatus (Diptera: Culicidae) and La Crosse virus. IV. Nutritional deprivation of larvae affects the adult barriers to infection and transmission. Journal of medical entomology 1991; 28(3): 378-386.

(164) Grimstad PR, Williams DG, Schmitt SM. Infection of white-tailed deer (Odocoileus virginianus) in Michigan with Jamestown Canyon virus (California serogroup) and the importance of maternal antibody in viral maintenance. Journal of wildlife diseases 1987; 23(1): 12-22.

(165) Griot C, et al. Replication in cultured C2C12 muscle cells correlates with the neuroinvasiveness of California Serogroup bunyaviruses. Virology (New York) 1994; 201(2): 399-403.

(166) Gundersen CB, Brown KL. Clinical aspects of La Crosse encephalitis: preliminary report. Progress in clinical and biological research 1983; 123: 169-177.

(167) Hacker D, Raju R, Kolakofsky D. La Crosse virus nucleocapsid protein controls its own synthesis in mosquito cells by encapsidating its mRNA. Journal of virology 1989; 63(12): 5166-5174.

(168) Hacker D, Rochat S, Kolakofsky D. Anti-mRNAs in La Crosse bunyavirus-infected cells. Journal of virology 1990; 64(10): 5051-5057.

(169) Haddow AD, Bixler D, Odoi A. The spatial epidemiology and clinical features of reported cases of La Crosse Virus infection in West Virginia from 2003 to 2007. BMC Infectious Diseases 2011; 11.

(170) Haddow AD, Bixler D, Schuh AJ. The demographic and socioeconomic factors predictive for populations at high-risk for La crosse virus infection in West Virginia. PLoS ONE 2011; 6(9).

(171) Haddow AD, Jones CJ, Odoi A. Assessing risk in focal arboviral infections: are we missing the big or little picture? PLoS ONE 2009(September): e6954.

(172) Haddow AD, Odoi A. The incidence risk, clustering, and clinical presentation of La Crosse virus infections in the Eastern United States, 2003-2007. PLoS ONE 2009; 4(7).

(173) Halonen PE, Toivanen P, Nikkari T. Non-specific serum inhibitors of activity of haemagglutinins of rabies and vesicular stomatitis viruses. Journal of General Virology 1974; 22(Part 3): 309-318.

(174) Hardin SG, et al. Clinical comparisons of la Crosse encephalitis and enteroviral central nervous system infections in a pediatric population: 2001 Surveillance in East Tennessee. American Journal of Infection Control 2003; 31(8): 508-510.

(175) Harmon B, et al. A genome-wide RNA interference screen identifies a role for Wnt/ beta -catenin signaling during Rift Valley fever virus infection. Journal of virology 2016; 90(16): 7084-7097.

(176) Harris MC, et al. La Crosse virus in Aedes japonicus japonicus mosquitoes in the Appalachian region, United States. Emerging Infectious Diseases 2015; 21(4): 646-649.

(177) Hedberg CW, Washburn JW, Sjogren RD. The association of artificial containers and LaCrosse encephalitis cases in Minnesota 1979. Journal of the American Mosquito Control Association 1985; 1(1): 89-90.

(178) Hefti HP, et al. Human MxA protein protects mice lacking a functional alpha/beta interferon system against La Crosse virus and other lethal viral infections. Journal of virology 1999; 73(8): 6984-6991.

(179) Hewlett MJ, et al. Genomic and biologic analyses of snowshoe hare virus field and laboratory strains. The American Journal of Tropical Medicine and Hygiene 1992; 46(5): 524-532.

(180) Hildreth SW, Beaty BJ. Application of enzyme immunoassays (EIA) for the detection of La Crosse viral antigens in mosquitoes. Progress in clinical and biological research 1983; 123: 303-312.

(181) Hildreth SW, et al. Detection of La Crosse arbovirus antigen in mosquito pools: Application of chromogenic and fluorogenic enzyme immunoassay systems. Journal of clinical microbiology 1982; 15(5): 879-884.

(182) Hinckley A, Hall A. Possible congenital infection with La Crosse encephalitis virus - West Virginia, 2006-2007. Morbidity and Mortality Weekly Report 2009; 58(1): 4-7.

(183) Hoff GL, et al. Arbovirus serology in North Dakota mule and white-tailed deer. Journal of wildlife diseases 1973; 9(4): 291-295.

(184) Hofmann H, et al. Severe fever with thrombocytopenia virus glycoproteins are targeted by neutralizing antibodies and can use DC-SIGN as a receptor for pH-dependent entry into human and animal cell lines. Journal of virology 2013; 87(8): 4384-4394.

(185) Hollidge BS, et al. Orthobunyavirus entry into neurons and other mammalian cells occurs via clathrin-mediated endocytosis and requires trafficking into early endosomes. Journal of virology 2012; 86(15): 7988-8001.

(186) Huang C, Thompson WH, Campbell WP. Comparison of the M RNA genome segments of two human isolates of La Crosse virus. Virus research 1995; 36(2/3): 177-185.

(187) Huang C, et al. Evidence that fatal human infections with La Crosse virus may be associated with a narrow range of genotypes. Virus research 1997; 48(2): 143-148.

(188) Hubalek Z, et al. Cross-neutralization study of seven California group (Bunyaviridae) strains in homoiothermous (PS) and poikilothermous (XTC-2) vertebrate cells. Journal of General Virology 1979; 42(2): 357-362.

(189) Hughes MT, et al. Comparative potential of Aedes triseriatus, Aedes albopictus, and Aedes aegypti (Diptera: Culicidae) to transovarially transmit La Crosse virus. Journal of medical entomology 2006; 43(4): 757-761.

(190) Indiana State Department of Health. 2000 Indiana Report of Infectious Diseases. Indiana State Department of Health; 2000.

(191) Indiana State Department of Health. 2002 Indiana Report of Infectious Diseases. Indiana State Department of Health; 2002.

(192) Indiana State Department of Health. 2003 Indiana Report of Infectious Diseases. Indiana State Department of Health; 2003.

(193) Indiana State Department of Health. 2004 Indiana Report of Infectious Diseases. Indiana State Department of Health; 2004.

(194) Issel CJ, et al. Selection for plaque variants of two California group arboviruses (Jamestown Canyon and La Crosse) by passage in natural vertebrate hosts. Acta Virologica 1975; 19(4): 318-326.

(195) Issel CJ, Trainer DO, Thompson WH. Experimental studies with white-tailed deer and four California group arboviruses (La Crosse, Trivittatus, snowshoe hare, and Jamestown Canyon). American Journal of Tropical Medicine and Hygiene 1972; 21(6): 979-984.

(196) Issel CJ, Trainer DO, Thompson WH. Serologic evidence of infections of white-tailed deer in Wisconsin with three California group arboviruses (La Crosse, trivittatus, and Jamestown Canyon). American Journal of Tropical Medicine and Hygiene 1972; 21(6): 985-988.

(197) Jackson BT, Brewster CC, Paulson SL. La Crosse virus infection alters blood feeding behavior in Aedes triseriatus and Aedes albopictus (Diptera: Culicidae). Journal of medical entomology 2012; 49(6): 1424-1429.

(198) Jacoby DR, et al. Expression of the La Crosse M Segment Proteins in a Recombinant Vaccinia Expression System Mediates pH-Dependent Cellular Fusion. Virology 1993; 193(2): 993-996.

(199) Jamnback TL, et al. Capture immunoglobulin M system for rapid diagnosis of La Crosse (California encephalitis) virus infections. Journal of clinical microbiology 1982; 16(3): 577-580.

(200) Jang CH, et al. Anchoring of nematic liquid crystals on viruses with different envelope structures. Nano letters 2006; 6(5): 1053-1058.

(201) Janssen R, Gonzalez-Scarano F, Nathanson N. Mechanisms of bunyavirus virulence. Comparative pathogenesis of a virulent strain of La Crosse and an avirulent strain of Tahyna virus. Laboratory Investigation 1984; 50(4): 447-455.

(202) Janssen RS, et al. Virulence of La Crosse virus is under polygenic control. Journal of virology 1986; 59(1): 1-7.

(203) Johnson AJ, et al. Detection of anti-arboviral immunoglobulin G by using a monoclonal antibody-based capture enzyme-linked immunosorbent assay. Journal of clinical microbiology 2000; 38(5): 1827-1831.

(204) Johnson RT. Pathogenesis of La Crosse virus in mice. Progress in clinical and biological research 1983; 123: 139-144.

(205) Jones SG, Coulter S, Conner W. Using administrative medical claims data to supplement state disease registry systems for reporting zoonotic infections. Journal of the American Medical Informatics Association 2013; 20(1): 193-198.

(206) Jones TF, et al. Newly recognized focus of La Crosse encephalitis in Tennessee. Clinical infectious diseases : an official publication of the Infectious Diseases Society of America 1999; 28(1): 93-97.

(207) Jones TF, et al. Serological survey and active surveillance for La Crosse virus infections among children in Tennessee. Clinical infectious diseases : an official publication of the Infectious Diseases Society of America 2000; 31(5): 1284-1287.

(208) Joyce JD, et al. Interactions between La Crosse virus and bacteria isolated from the digestive tract of Aedes albopictus (Diptera: Culicidae). Journal of medical entomology 2011; 48(2): 389-394.

(209) Kalis JM, Burgess AC, Balfour HH, Jr. Serological diagnosis of California (La Crosse) encephalitis by immunofluorescence. Journal of clinical microbiology 1975; 1(5): 448-450.

(210) Kallfass C, et al. Visualizing production of beta interferon by astrocytes and microglia in brain of la crosse virus-infected mice. Journal of virology 2012; 86(20): 11223-11230.

(211) Kamrud KI, et al. Use of the Sindbis replicon system for expression of LaCrosse virus envelope proteins in mosquito cells. Archives of Virology 1998; 143(7): 1365-1377.

(212) Kang SK, et al. Ex vivo promoter analysis of antiviral heat shock cognate 70B gene in Anopheles gambiae. Virology Journal; 2008 2008; 5(136).

(213) Kappus KD, et al. La Crosse virus infection and disease in western North Carolina. American Journal of Tropical Medicine and Hygiene 1982; 31(3): 556-560.

(214) Karabatsos N, Mathews JH. Serological reactions of fractionated hamster immunoglobulins with California group viruses. American Journal of Tropical Medicine and Hygiene 1980; 29(6): 1420-1427.

(215) Keil SD, et al. Inactivation of viruses in platelet and plasma products using a riboflavin-and-UV-based photochemical treatment. Transfusion 2015; 55(7): 1736-1744.

(216) Kelsey DS, Smith B. California Virus Encephalitis in North Carolina. North Carolina medical journal 1978; 39: 654-656.

(217) Kempf BJ, Blair CD, Beaty BJ. Quantitative analysis of La Crosse virus transcription and replication in cell cultures and mosquitoes. American Journal of Tropical Medicine and Hygiene 2006; 74(2): 224-232.

(218) Kentucky Department for Public Health. Encephalitis, Arboviral. Kentucky Department for Public Health; 2002.

(219) Kingsford L. Structure and biological function of La Crosse G1 glycoprotein. Progress in clinical and biological research 1983; 123: 157-166.

(220) Kingsford L. Enhanced neutralization of La Crosse virus by the binding of specific pairs of monoclonal antibodies to the G1 glycoprotein. Virology 1984; 136(2): 265-273.

(221) Kingsford L, Boucquey KH. Monoclonal antibodies specific for the G1 glycoprotein of La Crosse virus that react with other California serogroup viruses. Journal of General Virology 1990; 71(3): 523-530.

(222) Kingsford L, Boucquey KH, Cardoso TP. Effects of specific monoclonal antibodies on La crosse virus neutralization: Aggregation, inactivation by Fab fragments, and inhibition of attachment to baby hamster kidney cells. Virology 1991; 180(2): 591-601.

(223) Kingsford L, Hill DW. The effect of proteolytic cleavage of La Crosse virus G1 glycoprotein on antibody neutralization. Journal of General Virology 1983; 64(10): 2147-2156.

(224) Kingsford L, Ishizawa LD, Hill DW. Biological activities of monoclonal antibodies reactive with antigenic sites mapped on the G1 glycoprotein of la crosse virus. Virology 1983; 129(2): 443-455.

(225) Kitron U, et al. Spatial analysis of the distribution of LaCrosse encephalitis in Illinois, using a geographic information system and local and global spatial statistics. American Journal of Tropical Medicine and Hygiene 1997; 57(4): 469-475.

(226) Kitron U, et al. Introduction of Aedes albopictus into a La Crosse virus--enzootic site in Illinois. Emerging infectious diseases 1998; 4(4): 627-630.

(227) Klemm C, et al. Systems to establish bunyavirus genome replication in the absence of transcription. Journal of virology 2013; 87(14): 8205-8212.

(228) Klimas RA, et al. Genotypic varieties of La Crosse virus isolated from different geographic regions of the continental United States and evidence for a naturally occurring intertypic recombinant La Crosse virus. American Journal of Epidemiology 1981; 114(1): 112-131.

(229) Kobayashi D, Rouster-Stevens K, Harper A. La crosse virus encephalitis preceding neurosarcoidosis diagnosed by brain biopsy. Pediatrics 2011; 127(4): e1091-e1096.

(230) Kochs G, et al. Antivirally active MxA protein sequesters La Crosse virus nucleocapsid protein into perinuclear complexes. Proceedings of the National Academy of Sciences of the United States of America 2002; 99(5): 3153-3158.

(231) Kolakofsky D, Bellocq C, Raju R. The translational requirement for La Crosse virus S-mRNA synthesis. Cold Spring Harbor symposium on quantitative biology 1987; 52(52): 373-379.

(232) Kosoy O, et al. Serological survey for antibodies to mosquito-borne bunyaviruses among US National Park Service and US Forest Service employees. Vector Borne and Zoonotic Diseases 2016; 16(3): 191-198.

(233) Kramer LD, Thompson WH. Quantitation of La Crosse virus in venereally infected Aedes triseriatus. American Journal of Tropical Medicine and Hygiene 1983; 32(5): 1140-1146.

(234) Ksiazek TG, Yuill TM. Selection of La Crosse virus variants by sentinel squirrels (Sciurus carolinensis) and chipmunks (Tamius striatus). Acta virologica 1977; 21(2): 119-127.

(235) Ksiazek TG, Yuill TM. Viremia and antibody response to La Crosse virus in sentinel gray squirrels (Sciuris carolinensis) and chipmunks Tamias striatus). The American Journal of Tropical Medicine and Hygiene 1977; 26(4): 815-821.

(236) Kuno G, et al. Detecting bunyaviruses of the Bunyamwera and California serogroups by a PCR technique. Journal of clinical microbiology 1996; 34(5): 1184-1188.

(237) La Netta A, et al. 2013 Indiana Report of Infectious Diseases. Indiana State Department of Health; 2015.

(238) La Netta A, et al. 2011 Indiana Report of Infectious Diseases. Indiana State Department of Health; 2014.

(239) Lambert AJ, et al. La Crosse virus in Aedes albopictus mosquitoes, Texas, USA, 2009. Emerging Infectious Diseases 2010; 16(5): 856-858.

(240) Lambert AJ, et al. Nucleic acid amplification assays for detection of La Crosse virus RNA. Journal of clinical microbiology 2005; 43(4): 1885-1889.

(241) Lambert AJ, et al. Comparative sequence analyses of La Crosse virus strain isolated from patient with fatal encephalitis, Tennessee, USA. Emerging Infectious Diseases 2015; 21(5): 833-836.

(242) Lancaster MJ, Aedes albopictus in Peoria, an invasion by an exotic mosquito vector into an urban La Crosse virus endemic area in Illinois. United States -- Illinois: University of Illinois at Urbana-Champaign; 2005.

(243) Landry SV. Survival rates of Aedes triseriatus and the ecology of La Crosse virus at an endemic focus. Dissertation Abstracts International, B (Sciences and Engineering) 1988; 49(6).

(244) LaNetta A, et al. 2014 Indiana Report of Infectious Diseases. Indiana State Department of Health; 2015.

(245) LaNetta A, et al. 2012 Indiana Report of Infectious Diseases. Indiana State Department of Health; 2014.

(246) Lee JH, et al. Simultaneous detection of three mosquito-borne encephalitis viruses (eastern equine, La Crosse, and St. Louis) with a single-tube multiplex reverse transcriptase polymerase chain reaction assay. Journal of the American Mosquito Control Association 2002; 18(1): 26-31.

(247) Levine. MJ. Reportable Disease Surveillance in Virginia, 2014. Virginia Department of Health; 2015.

(248) Lienenklaus S, et al. Novel reporter mouse reveals constitutive and inflammatory expression of IFN-beta in vivo. Journal of immunology (Baltimore, Md: 1950) 2009; 183(5): 3229-3236.

(249) Lindsey HS, Klimas RA, Obijeski JF. La Crosse virus soluble cell culture antigen. Journal of clinical microbiology 1977; 6(6): 618-626.

(250) Lindsey HS, Thompson WH, Obijeski JF. Diagnosis of California La Crosse virus infection by counterimmunoelectrophoresis. Journal of clinical microbiology 1978; 7(6): 603-608.

(251) Lindsey NP, et al. West Nile virus and other arboviral diseases - United States, 2013. Morbidity and Mortality Weekly Report 2014; 63(24): 521-526.

(252) Lindsey NP, et al. West Nile virus and other nationally notifiable arboviral diseases - United States, 2014. Morbidity and Mortality Weekly Report 2015; 64(34): 929-934.

(253) Lisitza MA, et al. Prevalence rates of LaCrosse virus (California encephalitis group) in larvae from overwintered eggs of Aedes triseriatus. Mosquito News 1977; 37(4): 745-750.

(254) Louisiana Office of Public Health. Encephalitis, EEE & LAC Annual Report. . Louisiana Office of Public Health; 2015.

(255) Luby JP. Sensitivities of neurotropic arboviruses to human interferon. Journal of Infectious Diseases 1975; 132(4): 361-367.

(256) Ludwig GV, et al. Enzyme processing of La Crosse virus glycoprotein G1: a bunyavirus-vector infection model. Virology (New York) 1989; 171(1): 108-113.

(257) Ludwig GV, et al. Role of La Crosse virus glycoproteins in attachment of virus to host cells. Virology (New York) 1991; 181(1): 564-571.

(258) Ludwig GV, et al. Monoclonal antibodies directed against the envelope glycoproteins of La Crosse virus. Microbial pathogenesis 1991; 11(6): 411-421.

(259) Lyons MJ, Heyduk J. Aspects of the developmental morphology of california encephalitis virus in cultured vertebrate and arthropod cells and in mouse brain. Virology 1973; 54(1): 37-52.

(260) Ma M, et al. Murine leukemia virus pseudotypes of La Crosse and Hantaan Bunyaviruses: a system for analysis of cell tropism. Virus research 1999; 64(1): 23-32.

(261) Madoff DH, Lenard J. A membrane glycoprotein that accumulates intracellularly: Cellular processing of the large glycoprotein of LaCrosse virus. Cell 1982; 28(4): 821-829.

(262) Madoff DH, Lenard J. Cellular processing of the large glycoprotein of lacrosse virus (family bunyaviridae); implications for virion assembly and host defense. Advances in Experimental Medicine and Biology 1983; 162: 509-515.

(263) Mancao MY, Law IM, Roberson-Trammell K. California encephalitis in Alabama. Southern medical journal 1996; 89(10): 992-993.

(264) Mark-Carew M, Dotseth E, Stowers S. West Virginia Mosquito-borne Disease Surveillance Summary; 2013.

(265) Martin DA, et al. Standardization of immunoglobulin M capture enzyme-linked immunosorbent assays for routine diagnosis of arboviral infections. Journal of clinical microbiology 2000; 38(5): 1823-1826.

(266) Maryland Department of Health and Mental Hygiene (DHMH). Maryland Arbovirus Surveillance Results by Population and Jurisdiction 2001 Maryland Department of Health and Mental Hygiene (DHMH); 2001.

(267) Maryland Department of Health and Mental Hygiene (DHMH). Maryland Arbovirus surveillance Report 2000-2010. Maryland Department of Health and Mental Hygiene (DHMH); 2010.

(268) McGaw MM, et al. Effect of La Crosse virus infection on overwintering of Aedes triseriatus. American Journal of Tropical Medicine and Hygiene 1998; 58(2): 168-175.

(269) McJunkin JE, et al. Treatment of severe La Crosse encephalitis with intravenous ribavirin following diagnosis by brain biopsy. Pediatrics 1997; 99(2): 261-267.

(270) McJunkin JE, et al. Safety and pharmacokinetics of ribavirin for the treatment of la crosse encephalitis. The Pediatric infectious disease journal 2011; 30(10): 860-865.

(271) McJunkin JE, et al. La Crosse encephalitis in children. New England Journal of Medicine 2001; 344(11): 801-807.

(272) McLerran CJ, Arlinghaus RB. Structural components of a virus of the California encephalitis complex: LaCrosse virus. Virology 1973; 53(1): 247-257.

(273) Medlin S, et al. Serosurvey of Selected Arboviral Pathogens in Free-Ranging, Two-Toed Sloths (Choloepus Hoffmanni) and Three-Toed Sloths (Bradypus Variegatus) in Costa Rica, 2005-07. Journal of wildlife diseases 2016; 52(4): 883-892.

(274) Miller A, et al. La Crosse viral infection in hospitalized pediatric patients in Western North Carolina. Hospital pediatrics 2012; 2(4): 235-242.

(275) Miller BR. A variant of La Crosse virus attenuated for Aedes triseriatus mosquitoes. American Journal of Tropical Medicine and Hygiene 1983; 32(6): 1422-1428.

(276) Miller BR, Beaty BJ, Lorenz LH. Variation of La Crosse virus filial infection rates in geographic strains of Aedes triseriatus (Diptera: Culicidae). Journal of medical entomology 1982; 19(2): 213-214.

(277) Miller BR, DeFoliart GR. Infection rates of Ascocystis-infected Aedes triseriatus following ingestion of La Crosse virus by the larvae. American Journal of Tropical Medicine and Hygiene 1979; 28(6): 1064-1066.

(278) Miller BR, et al. Infection rates of Aedes triseriatus following ingestion of La Crosse virus by the larvae. American Journal of Tropical Medicine and Hygiene 1978; 27(3): 605-608.

(279) Miller BR, DeFoliart GR, Yuill TM. Vertical transmission of La Crosse virus (California encephalitis group): transovarial and filial infection rates in Aedes triseriatus (Diptera: Culicidae). Journal of medical entomology 1977; 14(4): 437-440.

(280) Miller BR, DeFoliart GR, Yuill TM. Aedes triseriatus and La Crosse virus: lack of infection in eggs of the first ovarian cycle following oral infection of females. The American Journal of Tropical Medicine and Hygiene 1979; 28(5): 897-901.

(281) Miner JJ, et al. The TAM receptor Mertk protects against neuroinvasive viral infection by maintaining blood-brain barrier integrity. Nature medicine 2015; 21(12): 1464-1472.

(282) Minnesota Department of Health. Annual Summary of Communicable Diseases Reported to the Minnesota Department of Health, 1997. Disease Control Newsleter 1998.

(283) Minnesota Department of Health. Annual Summary of Communicable Diseases Reported to the Minnesota Department of Health, 1998. Disease Control Newsletter 1999.

(284) Minnesota Department of Health. Annual Summary of Communicable Diseases Reported to the Minnesota Department of Health, 1999. Disease Control Newsletter 2000.

(285) Minnesota Department of Health. Annual Summary of Communicable Diseases Reported to the Minnesota Department of Health, 2000. Disease Control Newsletter 2001.

(286) Minnesota Department of Health. Annual Summary of Communicable Diseases Reported to the Minnesota Department of Health, 2001. Disease Control Newsletter 2002.

(287) Minnesota Department of Health. Annual Summary of Communicable Diseases Reported to the Minnesota Department of Health, 2002. Disease Control Newsletter 2003.

(288) Minnesota Department of Health. Annual Summary of Communicable Diseases Reported to the Minnesota Department of Health, 2003. Disease Control Newsletter 2004.

(289) Minnesota Department of Health. Annual Summary of Communicable Diseases Reported to the Minnesota Department of Health, 2004 Disease Control Newsletter 2005.

(290) Minnesota Department of Health. Annual Summary of Communicable Diseases Reported to the Minnesota Department of Health, 2005. Disease Control Newsletter 2006.

(291) Minnesota Department of Health. Annual Summary of Communicable Diseases Reported to the Minnesota Department of Health, 2006. Disease Control Newsletter 2007.

(292) Minnesota Department of Health. Annual Summary of Communicable Diseases Reported to the Minnesota Department of Health, 2007. Disease Control Newsletter 2008.

(293) Minnesota Department of Health. Annual Summary of Communicable Diseases Reported to the Minnesota Department of Health, 2008. Disease Control Newsletter 2009.

(294) Minnesota Department of Health. Annual Summary of Communicable Diseases Reported to the Minnesota Department of Health, 2010. Disease Control Newsletter 2011.

(295) Minnesota Department of Health. Annual Summary of Communicable Diseases Reported to the Minnesota Department of Health, 2011. Disease Control Newsletter 2012.

(296) Minnesota Department of Health. Annual Summary of Communicable Diseases Reported to the Minnesota Department of Health, 2012. Disease Control Newsletter 2013.

(297) Minnesota Department of Health. Biennial Report 2013-2014; 2015.

(298) Minnesota Department of Health. Annual Summary of Communicable Diseases Reported to the Minnesota Department of Health, 2014. Disease Control Newsletter 2015.

(299) Minnesota Department of Health. Annual Summary of Communicable Diseases Reported to the Minnesota Department of Health, 2015. Disease Control Newsletter 2016.

(300) Mississippi State Department of Health. Mississippi Morbidity Report - Annual Summary Selected Reportable Diseases Mississippi 2007. Mississippi State Department of Health; 2008.

(301) Mississippi State Department of Health. Mississippi Morbidity Report - Annual Summary Selected Reportable Diseases Mississippi 2008. Mississippi State Department of Health; 2009.

(302) Mississippi State Department of Health. Mississippi Morbidity Report - Annual Summary Selected Reportable Diseases Mississippi 2012. . Mississippi State Department of Health; 2014.

(303) Mississippi State Department of Health. Mississippi Morbidity Report - Annual Summary Selected Reportable Diseases Mississippi 2013; 2016.

(304) Mitchell CJ, et al. Isolation of La Crosse, Cache Valley, and Potosi viruses from Aedes mosquitoes (Diptera: Culicidae) collected at used-tire sites in Illinois during 1994-1995. Journal of medical entomology 1998; 35(4): 573-577.

(305) Miura TA, et al. Expression of human MxA protein in mosquito cells interferes with LaCrosse virus replication. Journal of virology 2001; 75(6): 3001-3003.

(306) Monath TPC, et al. Studies on california encephalitis in minnesota. American Journal of Epidemiology 1970; 92(1): 40-50.

(307) Mudhasani R, et al. IFITM-2 and IFITM-3 but not IFITM-1 restrict rift valley fever virus. Journal of virology 2013; 87(15): 8451-8464.

(308) Mukherjee P, et al. Activation of the innate signaling molecule mavs by bunyavirus infection upregulates the adaptor protein sarm1, leading to neuronal death. Immunity 2013; 38(4): 705-716.

(309) Murphree R, et al. La Crosse Encephalitis Surveillance using Single Versus Paired Serologic Testing. Zoonoses and public health 2012; 59(3): 181-183.

(310) Murphy RK. Serologic evidence of arboviral infections in white-tailed deer from central Wisconsin. Journal of wildlife diseases 1989; 25(2): 300-301.

(311) Muturi EJ, et al. Midgut fungal and bacterial microbiota of Aedes triseriatus and Aedes japonicus shift in response to La Crosse virus infection. Molecular ecology 2016; 25(16): 4075-4090.

(312) Nag DK, Finley D. A small-molecule inhibitor of deubiquitinating enzyme USP14 inhibits Dengue virus replication. Virus research 2012; 165(1): 103-106.

(313) Nagayama JN, et al. Bunyavirus infections in North Carolina white-tailed deer (Odocoileus virginianus). Vector Borne Zoonotic Dis 2001; 1(2): 169-171.

(314) Najjar JA, et al. Epitopes of the G1 glycoprotein of La Crosse virus form overlapping clusters within a single antigenic site. Virology 1985; 144(2): 426-432.

(315) Nasci RS. Local variation in blood feeding by Aedes triseriatus and Aedes hendersoni (Diptera: Culicidae). Journal of medical entomology 1985; 22(6): 619-623.

(316) Nasci RS, Mitchell CJ. Arbovirus titer variation in field-collected mosquitoes. Journal of the American Mosquito Control Association 1996; 12(2 PART 1): 167-171.

(317) Nasci RS, et al. La Crosse encephalitis virus habitat associations in Nicholas County, West Virginia. Journal of medical entomology 2000; 37(4): 559-570.

(318) Neitzel DF, Grimstad PR. Serological evidence of California group and Cache Valley virus infection in Minnesota white-tailed deer. Journal of wildlife diseases 1991; 27(2): 230-237.

(319) Nolan KF, et al. The design and use of specific genetic probes to identify closely related bunyaviruses and to determine the genotype of their recombinants. The Journal of general virology 1989; 70 ( Pt 8)(Pt 8): 2201-2207.

(320) North Carolina Public Health. Reported Communicable Disease Cases, NC, January-December 2004. North Carolina Public Health; 2004.

(321) North Carolina Public Health. North Carolina Communicable Disease Monthly Report - December 2012.; 2012.

(322) North Carolina Public Health. North Carolina Communicable Disease Monthly Report - November 2013; 2013.

(323) Obijeski JF, et al. Structural proteins of La Crosse virus. Journal of virology 1976; 19(3): 985-997.

(324) Obijeski JF, et al. Segmented genome and nucleocapsid of La Crosse virus. Journal of virology 1976; 20(3): 664-675.

(325) Obijeski JF, McCauley J, Skehel JJ. Nucleotide sequences at the terminal of La Crosse virus RNAs. Nucleic acids research 1980; 8(11): 2431-2438.

(326) Ohio Department of Health. La Crosse Virus Disease Incidence, Ohio 1963 – 2016; 2016.

(327) Operschall E, et al. Enhanced protection against viral infection by co-administration of plasmid DNA coding for viral antigen and cytokines in mice. Journal of Clinical Virology 1999; 13(1-2): 17-27.

(328) Osorio JE, et al. La crosse viremias in white-tailed deer and chipmunks exposed by injection or mosquito bite. American Journal of Tropical Medicine and Hygiene 1996; 54(4): 338-342.

(329) Osorio JE, Schoepp RJ, Yuill TM. Effects of La Crosse virus infection on pregnant domestic rabbits and Mongolian gerbils. American Journal of Tropical Medicine and Hygiene 1996; 55(4): 384-390.

(330) Pantuwatana S, et al. Experimental infection of chipmunks and squirrels with La Crosse and Trivittatus viruses and biological transmission of La Crosse virus by Aedes triseriatus. The American Journal of Tropical Medicine and Hygiene 1972; 21(4): 476-481.

(331) Pantuwatana S, et al. Isolation of La Crosse virus from field collected Aedes triseriatus larvae. American Journal of Tropical Medicine and Hygiene 1974; 23(2): 246-250.

(332) Papadopoulos O, Anslow RO, Hanson RP. Application of the immunodiffusion procedure to rapid identification of arboviruses and to detection of specific antibody in sentinel animals2. American Journal of Epidemiology 1970; 92(2): 145-150.

(333) Patrican LA, DeFoliart GR. Lack of adverse effect of transovarially acquired La Crosse virus infection on the reproductive capacity of Aedes triseriatus (Diptera: Culicidae). Journal of medical entomology 1985; 22(6): 604-611.

(334) Patrican LA, DeFoliart GR. Aedes triseriatus and La Crosse virus: similar venereal infection rates in females given the first bloodmeal immediately before mating or several days after mating. American Journal of Tropical Medicine and Hygiene 1987; 36(3): 648-652.

(335) Patrican LA, DeFoliart GR, Yuill TM. Oral infection and transmission of La Crosse virus by an enzootic strain of Aedes triseriatus feeding on chipmunks with a range of viremia levels. American Journal of Tropical Medicine and Hygiene 1985; 34(5): 992-998.

(336) Patrican LA, DeFoliart GR, Yuill TM. La Crosse viremias in juvenile, subadult and adult chipmunks (Tamias striatus) following feeding by transovarially-infected Aedes triseriatus. American Journal of Tropical Medicine and Hygiene 1985; 34(3): 596-602.

(337) Patterson JL, et al. Multiple leader RNAs and messenger RNAs are transcribed from the la crosse virus small genome segment. Cell 1983; 33(3): 791-799.

(338) Patterson JL, Holloway B, Kolakofsky D. La Crosse virions contain a primer-stimulated RNA polymerase and a methylated cap-dependent endonuclease. Journal of virology 1984; 52(1): 215-222.

(339) Patterson JL, Kolakofsky D. Characterization of La Crosse virus small-genome transcripts. Journal of virology 1984; 49(3): 680-685.

(340) Patterson JL, et al. Isolation of the ends of La Crosse virus small RNA as a double-stranded structure. Journal of virology 1983; 45(2): 882-884.

(341) Paulson SL, Vector competence for La Crosse virus in the Aedes triseriatus group [A. triseriatus, A. hendersoni, A. zoosophus and A. brelandi]: effect of midgut and salivary gland barriers; 1987.

(342) Paulson SL, Grimstad PR. Replication and dissemination of La Crosse virus in the competent vector Aedes triseriatus and the incompetent vector Aedes hendersoni and evidence for transovarial transmission by Aedes hendersoni (Diptera: Culicidae). Journal of medical entomology 1989; 26(6): 602-609.

(343) Paulson SL, Grimstad PR, Craig GB. Midgut and salivary gland barriers to La Crosse virus dissemination in mosquitoes of the Aedes triseriatus group. Medical and veterinary entomology 1989; 3(2): 113-123.

(344) Paulson SL, Hawley WA. Effect of body size on the vector competence of field and laboratory populations of Aedes triseriatus for La Crosse virus. Journal of the American Mosquito Control Association 1991; 7(2): 170-175.

(345) Paulson SL, et al. Vector competence of Aedes hendersoni (Diptera: Culicidae) for La Crosse virus: lack of impaired function in virus-infected salivary glands and enhanced virus transmission by sporozoite-infected mosquitoes. Journal of medical entomology 1992; 29(3): 483-488.

(346) Pavlovic J, et al. DNA vaccination against La Crosse virus. Intervirology 2000; 43(4-6): 312-321.

(347) Pedersen K, et al. Short report: Antibody prevalence of select arboviruses in mute swans (Cygnus olor) in the Great Lakes region and Atlantic coast of the United States. The American Journal of Tropical Medicine and Hygiene 2014; 91(6): 1247-1249.

(348) Pekosz A, GonzalezScarano F. The extracellular domain of La Crosse virus G1 forms oligomers and undergoes pH-dependent conformational changes. Virology (New York) 1996; 225(1): 243-247.

(349) Pekosz A, et al. Tropism of bunyaviruses: evidence for a G1 glycoprotein-mediated entry pathway common to the California serogroup. Virology (New York) 1995; 214(2): 339-348.

(350) Pekosz A, et al. Protection from La Crosse virus encephalitis with recombinant glycoproteins: Role of neutralizing anti-G1 antibodies. Journal of virology 1995; 69(6): 3475-3481.

(351) Pekosz A, et al. Induction of apoptosis by La Crosse virus infection and role of neuronal differentiation and human bcl-2 expression in its prevention. Journal of virology 1996; 70(8): 5329-5335.

(352) Perry JW, et al. Antiviral activity of a small molecule deubiquitinase inhibitor occurs via induction of the unfolded protein response. PLoS Pathogens 2012; 8(7): 43.

(353) Peterson K, Woods T, Mukherjee P. Innate immune response contributes to virus-mediated neuronal death through activation of SARM. 99th Annual Meeting of the American Association of Immunologist, IMMUNOLOGY 2012 Boston, MA United States 2012; 188 (1 MeetingAbstracts) (no pagination.

(354) Pinger RR, Grimstad PR, Sinsko MJ. Arbovirus isolations from Delaware County mosquitoes, 1978. Proceedings of the Indiana Academy of Science; 1980, 1980.

(355) Pinger RR, et al. Isolation of La Crosse and other arboviruses from Indiana mosquitoes, 1961-1982. Mosquito News 1983; 43(4): 459-463.

(356) Pinger RR, et al. Trivittatus virus infections in wild mammals and sentinel rabbits in central Iowa. The American Journal of Tropical Medicine and Hygiene 1975; 24(6 Pt 1): 1006-1009.

(357) Pinto AK, et al. Human and murine IFIT1 proteins do not restrict infection of negative-sense RNA viruses of the Orthomyxoviridae, Bunyaviridae, and Filoviridae families. Journal of virology 2015; 89(18): 9465-9476.

(358) Plassmeyer ML, et al. California serogroup Gc (G1) glycoprotein is the principal determinant of pH-dependent cell fusion and entry. Virology 2005; 338(1): 121-132.

(359) Plassmeyer ML, et al. Mutagenesis of the La Crosse Virus glycoprotein supports a role for Gc (1066-1087) as the fusion peptide. Virology 2007; 358(2): 273-282.

(360) Pobjecky N, Jacoby D, Gonzalez-Scarano F. Use of a resonance energy transfer assay to investigate the fusion function of La Crosse virus. Virus research 1988; 11(SUPPL. 1): 11.

(361) Pobjecky N, Smith J, Gonzalez-Scarano F. Biological studies of the fusion function of California serogroup Bunyaviruses. Microbial pathogenesis 1986; 1(5): 491-501.

(362) Powers AM, et al. Molecularly engineered resistance to California serogroup virus replication in mosquito cells and mosquitoes. Proceedings of the National Academy of Sciences of the United States of America 1996; 93(9): 4187-4191.

(363) Powers AM, et al. Intracellular immunization of mosquito cells to LaCrosse virus using a recombinant Sindbis virus vector. Virus research 1994; 32(1): 57-67.

(364) Proenca-Modena JL, et al. Interferon-regulatory factor 5-dependent signaling restricts orthobunyavirus dissemination to the central nervous system. Journal of virology 2016; 90(1): 189-205.

(365) Rabson M, et al. Production of hemagglutinating of La Crosse virus by polyethylene glycol precipitation. Journal of clinical microbiology 1981; 13(3): 601-602.

(366) Radke E, et al. Florida 2008 Arbovirus Activity by County. Florida Health; 2009.

(367) Raju R, Kolakofsky D. Inhibitors of protein synthesis inhibit both La Crosse virus S-mRNA and S genome syntheses in vivo. Virus research 1986; 5(1): 1-9.

(368) Raju R, Kolakofsky D. Unusual transcripts in La Crosse virus-infected cells and the site for nucleocapsid assembly. Journal of virology 1987; 61(3): 666-672.

(369) Raju R, Kolakofsky D. Translational requirement of La Crosse virus S-mRNA synthesis: In vivo studies. Journal of virology 1987; 61(1): 96-103.

(370) Raju R, Kolakofsky D. La Crosse virus infection of mammalian cells induces mRNA instability. Journal of virology 1988; 62(1): 27-32.

(371) Raju R, Kolakofsky D. The ends of La Crosse virus genome and antigenome RNAs within nucleocapsids are base paired. Journal of virology 1989; 63(1): 122-128.

(372) Raju R, Raju A, Kolakofsky D. The translational requirement for complete La Crosse virus mRNA synthesis is cell-type dependent. Journal of virology 1989; 63(12): 5159-5165.

(373) Ravkov EV, Compans RW. Hantavirus nucleocapsid protein is expressed as a membrane-associated protein in the perinuclear region. Journal of virology 2001; 75(4): 1808-1815.

(374) Reese SM, et al. Aedes triseriatus females transovarially infected with la crosse virus mate more efficiently than uninfected mosquitoes. Journal of medical entomology 2009; 46(5): 1152-1158.

(375) Reese SM, et al. Potential for La Crosse virus segment reassortment in nature. Virology Journal; 2008 2008; 5(164).

(376) Reese SM, et al. Identification of super-infected Aedes triseriatus mosquitoes collected as eggs from the field and partial characterization of the infecting La Crosse viruses. Virology Journal; 2010 2010; 7(76).

(377) Reguera J, et al. Structural basis for encapsidation of genomic RNA by La Crosse Orthobunyavirus nucleoprotein. Proceedings of the National Academy of Sciences of the United States of America, 2013, pp. 7246-7251.

(378) Reguera J, Weber F, Cusack S. Bunyaviridae RNA polymerases (L-protein) have an N-terminal, influenza-like endonuclease domain, essential for viral cap-dependent transcription. PLoS Pathogens 2010; 6(9).

(379) Reichelt M, et al. Missorting of LaCrosse virus nucleocapsid protein by the interferon-induced MxA GTPase involves smooth ER membranes. Traffic 2004; 5(10): 772-784.

(380) Remley K. Reportable Disease Surveillance in Virginia, 2008. Virginia Department of Health; 2008.

(381) Roberts A, et al. Completion of the La crosse virus genome sequence and geneticcomparisons of the L proteins of the Bunyaviridae. Virology 1995; 206(1): 742-745.

(382) Robinson KS, Long WJ, Craig AS. Communicable and Environmental Disease Services Annual Report 2002. Tennessee Department of Health, Communicable and Environmental Disease Services Section; 2002.

(383) Robinson KS, Long WJ, Craig AS. Communicable and Environmental Disease Services Annual Report 2003. Tennessee Department of Health, Communicable and Environmental Disease Services; 2003.

(384) Romero CC. Reportable Disease Surveillance in Virginia 2012. Virginia Department of Health; 2012.

(385) Rossier C, Patterson J, Kolakofsky D. La Crosse virus small genome mRNA is made in the cytoplasm. Journal of virology 1986; 58(2): 647-650.

(386) Rossier C, Raju R, Kolakofsky D. LaCrosse virus gene expression in mammalian and mosquito cells. Virology (New York) 1988; 165(2): 539-548.

(387) Rowley WA, Dorsey DC, Knowles MA. The replication of two California serogroup viruses in a cell line from the mosquito Aedes triseriatus (Diptera: Culicidae). Journal of medical entomology 1984; 21(5): 501-505.

(388) Rowley WA, et al. Mosquito-borne virus activity in Iowa, 1975-1976. Mosquito News 1979; 39(1): 1-9.

(389) Rowley WA, et al. Field studies on mosquito arbovirus relationships in Iowa, 1971. Journal of medical entomology 1973; 10(6): 613-617.

(390) Rozhon EJ, et al. Attenuation of virulence of a bunyavirus involving an L RNA defect and isolation of LAC/SSH/LAC and LAC/SSH/SSH reassortants. Virology 1981; 111(1): 125-138.

(391) Sandrock M, et al. Interferon-induced rat Mx proteins confer resistance to Rift Valley fever virus and other arthropod-borne viruses. Journal of Interferon & Cytokine Research 2001; 21(9): 663-668.

(392) Sardelis MR, Turell MJ, Andre RG. Laboratory transmission of La Crosse virus by Ochlerotatus j. japonicus (Diptera: Culicidae). Journal of medical entomology 2002; 39(4): 635-639.

(393) Scheidler LC, et al. Survey of Aedes triseriatus (Diptera: Culicidae) for Lacrosse Encephalitis Virus and West Nile Virus in Lorain County, Ohio. Journal of medical entomology 2006; 43(3): 589-593.

(394) Schopen S, Labuda M, Beaty B. Vertical and venereal transmission of California group viruses by Aedes triseriatus and Culiseta inornata mosquitoes. Acta Virologica 1991; 35(4): 373-382.

(395) Schuh T, et al. DNA-based vaccine against la crosse virus: Protective immune response mediated by neutralizing antibodies and CD4+ T cells. Human Gene Therapy 1999; 10(10): 1649-1658.

(396) Schultz KL, Vernon PS, Griffin DE. Differentiation of neurons restricts Arbovirus replication and increases expression of the alpha isoform of IRF-7. Journal of virology 2015; 89(1): 48-60.

(397) Seymour C, et al. Experimental infection of chipmunks and snowshoe hares with La Crosse and snowshoe hare viruses and four of their reassortants. The American Journal of Tropical Medicine and Hygiene 1983; 32(5): 1147-1153.

(398) Seymour C, Yuill TM. Studies on selection of LaCrosse virus variants by natural vertebrate hosts and vector mosquitoes. Acta Virologica 1981; 25(2): 87-94.

(399) Shope RE, Rozhont EJ, Bishop DHL. Role of the middle-sized bunyavirus RNA segment in mouse virulence. Virology 1981; 114(1): 273-276.

(400) Shultz R, et al. Florida 2006 Arbovirus Activity by County. Florida Health; 2006.

(401) Shultz R, et al. Florida 2007 Arbovirus Activity by County. Florida Health 2007.

(402) Sikes RK, Calisher CH, Smith JD. Human Infections with La Crosse Virus in Georgia, 1982. Southern medical journal 1984; 77(8): 972-974.

(403) Sjogren RD, Washburn J. Arbovirus surveillance and control in Minnesota. Forty-seventh Annual Conference of the California Mosquito and Vector Control Association, Inc. Visalia, California: CMVCA Press., 1979.

(404) Smith DR, et al. Development of FGI-106 as a broad-spectrum therapeutic with activity against members of the family Bunyaviridae. Fort Detrick, MD, United States: United States Army Medical research institute of infectious Diseases (USAMRIID), ; 2010.

(405) Sokol DK, Kleiman MB, Garg BP. LaCrosse viral encephalitis mimics herpes simplex viral encephalitis. Pediatric neurology 2001; 25(5): 413-415.

(406) Soldan SS, et al. La Crosse virus (LACV) Gc fusion peptide mutants have impaired growth and fusion phenotypes, but remain neurotoxic. Virology 2010; 404(2): 139-147.

(407) Soldan SS, et al. La Crosse virus nonstructural protein NSs counteracts the effects of short interfering RNA. Journal of virology 2005; 79(1): 234-244.

(408) Sotir MJ, et al. Endemic human mosquito-borne disease in Wisconsin residents, 2002-2006. Wisconsin medical journal 2007; 106(4): 185-190.

(409) South Carolina Department of Health and Environmental Control. 2006 South Carolina La Crosse Virus Cases. South Carolina Department of Health and Environmental Control; 2006.

(410) South Carolina Department of Health and Environmental Control. 2012-2013 South Carolina Annual Report on Reportable Conditions.; 2014.

(411) South Carolina Department of Health and Environmental Control. Division of Acute Disease Epidemiology Quarterly Disease Report 2015-2016. . South Carolina Department of Health and Environmental Control; 2016.

(412) Sprance HE, Shope RE. Single inoculation immune hamster sera for typing California group arboviruses by the complement fixation test. American Journal of Tropical Medicine and Hygiene 1977; 26(3): 544-546.

(413) Srihongse S, Grayson MA, Deibel R. California serogroup viruses in New York State: The role of subtypes in human infections. American Journal of Tropical Medicine and Hygiene 1984; 33(6): 1218-1227.

(414) Stobierski MG, et al. Michigan Zoonotic & Vector-Borne Disease Surveillance Summary 2012. Michigan Department of Community Health; 2013.

(415) Sundin DR. Evolutionary potential of Bunyaviruses [La Crosse virus] in Aedes triseriatus mosquitoes. Dissertation Abstracts International, B (Sciences and Engineering) 1987; 47(11): 4416-B.

(416) Sutherland IW, Vector and virus interactions: La Crosse encephalitis virus and the mosquito vector Aedes (stegomyia) albopictus. United States -- Colorado: Colorado State University; 2008.

(417) Szumlas DE, et al. Seroepidemiology of La Crosse virus infection in humans in western North Carolina. American Journal of Tropical Medicine and Hygiene 1996; 54(4): 332-337.

(418) Szumlas DE, et al. Relative abundance and species composition of mosquito populations (Diptera:Culicidae) in a La Crosse virus-endemic area in western North Carolina. Journal of medical entomology 1996; 33(4): 598-607.

(419) Talmon Y, et al. Electron microscopy of vitrified-hydrated La Crosse virus. Journal of virology 1987; 61(7): 2319-2321.

(420) Tatum LM, et al. Canine LaCrosse viral meningoencephalomyelitis with possible public health implications. Journal of Veterinary Diagnostic Investigation 1999; 11(2): 184-188.

(421) Taylor K, et al. Age-dependent susceptibility to La Crosse Virus-induced neurological disease mediated by TLR3/RLR signaling pathways. 12th International Symposium on NeuroVirology Washington, DC United States 2013; 19: S81.

(422) Teleron AL, et al. La Crosse Encephalitis: An Adult Case Series. The American Journal of Medicine 2016; 129(8): 881-884.

(423) Tesh RB, Gubler DJ. Laboratory studies of transovarial transmission of La Crosse and other arboviruses by Aedes albopictus and Culex fatigans. American Journal of Tropical Medicine and Hygiene 1975; 24(5): 876-880.

(424) Texas Department of State Health Services Infectious Disease Control Unit. Arbovirus Activity in Texas 2012 Surveillance Report. Texas 2014.

(425) Thomas AK, Pinger RR, Grimstad PR. Confirmation of a LaCrosse virus (California encephalitis group) focus in Delaware County. Proceedings of the Indiana Academy of Science, 1982.

(426) Thompson WH. Higher venereal infection and transmission rates with La Crosse virus in Aedes triseriatus engorged before mating. American Journal of Tropical Medicine and Hygiene 1979; 28(5): 890-896.

(427) Thompson WH. Lower rates of oral transmission of La Crosse virus by Aedes triseriatus venereally exposed after engorgement on immune chipmunks. American Journal of Tropical Medicine and Hygiene 1983; 32(6): 1416-1421.

(428) Thompson WH, et al. La Crosse virus isolations from mosquitoes in Wisconsin, 1964-68. The American Journal of Tropical Medicine and Hygiene 1972; 21(2): 90-96.

(429) Thompson WH, Beaty BJ. Venereal transmission of La Crosse (California encephalitis) arbovirus in Aedes triseriatus mosquitoes. Science, USA 1977; 196(4289): 530-531.

(430) Thompson WH, Beaty BJ. Venereal transmission of La Crosse virus from male to female Aedes triseriatus. American Journal of Tropical Medicine and Hygiene 1978; 27(1): 187-196.

(431) Thompson WH, Gundersen CB. La Crosse encephalitis: occurrence of disease and control in a suburban area. Progress in clinical and biological research 1983; 123: 225-236.

(432) Toltzis P, O'Connell K, Patterson JL. Effect of phosphorylated ribavirin on vesicular stomatitis virus transcription. Antimicrobial Agents and Chemotherapy 1988; 32(4): 492-497.

(433) Trout Fryxell RT, et al. Cemeteries are effective sites for monitoring la Crosse virus (LACv) and these environments may play a role in LACv infection. PLoS ONE 2015; 10(4).

(434) Turell MJ. Virus-dependent mortality in Rift Valley fever, eastern equine encephalomyelitis, and chikungunya virus-inoculated mosquito (Diptera: Culicidae) larvae. Journal of medical entomology 1992; 29(5): 792-795.

(435) Turell MJ, Gargan TP, II, Bailey CL. Culex pipiens (Diptera: Culicidae) morbidity and mortality associated with Rift Valley fever virus infection. Journal of medical entomology 1985; 22(3): 332-337.

(436) Urquidi V, Bishop DHL. Non-random reassortment between the tripartite RNA genomes of La Crosse and snowshoe hare viruses. Journal of General Virology 1992; 73(9): 2255-2265.

(437) Utz JT, Apperson CS, Dietz EJ. Social impacts of La Crosse Encephalitis in North Carolina. Human organization 2005; 64(2): 135-146.

(438) Utz JT, et al. Economic and social impacts of La Crosse encephalitis in western North Carolina. American Journal of Tropical Medicine and Hygiene 2003; 69(5): 509-518.

(439) Verbruggen P, et al. Interferon antagonist NSs of La Crosse virus triggers a DNA damage response-like degradation of transcribing RNA polymerase II. The Journal of biological chemistry 2011; 286(5): 3681-3692.

(440) Virginia Department of Health. Descriptive Epidemiology of Reportable Diseases, Virginia 1994 Annual Report. Virginia Department of Health; 1994.

(441) Virginia Department of Health. Descriptive Epidemiology of Reportable Diseases, Virginia 1995 Annual Report. Virginia Department of Health; 1995.

(442) Virginia Department of Health. Descriptive Epidemiology of Reportable Diseases, Virginia 1996 Annual Report. Virginia Department of Health; 1996.

(443) Virginia Department of Health. Descriptive Epidemiology of Reportable Diseases, Virginia 1997 Annual Report. Virginia Department of Health; 1997.

(444) Virginia Department of Health. Descriptive Epidemiology of Reportable Diseases, Virginia 1998 Annual Report. Virginia Department of Health; 1998.

(445) Virginia Department of Health. Descriptive Epidemiology of Reportable Diseases, Virginia 2001 Annual Report. Virginia Department of Health; 2001.

(446) Virginia Department of Health. Descriptive Epidemiology of Reportable Diseases, Virginia 2002 Annual Report. Virginia Department of Health; 2002.

(447) Virginia Department of Health. Descriptive Epidemiology of Reportable Diseases, Virginia 2003 Annual Report. Virginia Department of Health; 2003.

(448) Virginia Department of Health. Descriptive Epidemiology of Reportable Diseases, Virginia 2004 Annual Report. Virginia Department of Health; 2004.

(449) Virginia Department of Health. Descriptive Epidemiology of Reportable Diseases, Virginia 2005 Annual Report. Virginia Department of Health; 2005.

(450) Vodkin MH, et al. PCR-based detection of arboviral RNA from mosquitoes homogenized in detergent. BioTechniques 1994; 17(1): 114-116.

(451) Walker ED, Grayson MA, Edman JD. Isolation of Jamestown Canyon and snowshoe hare viruses (California serogroup) from Aedes mosquitoes in western Massachusetts. Journal of the American Mosquito Control Association 1993; 9(2): 131-134.

(452) Wang GJ, Hewlett M, Chiu W. Structural variation of La Crosse virions under different chemical and physical conditions. Virology (New York) 1991; 184(1): 455-459.

(453) Wang R, et al. Antiviral responses in mouse embryonic stem cells: Differential development of cellular mechanisms in type I interferon production and response. Journal of Biological Chemistry 2014; 289(36): 25186-25198.

(454) Wang RX, et al. Mouse embryonic stem cells are deficient in type I interferon expression in response to viral infections and double-stranded RNA. Journal of Biological Chemistry 2013; 288(22): 15926-15936.

(455) Wasieloski LP, Jr., et al. Reverse transcription-PCR detection of LaCrosse virus in mosquitoes and comparison with enzyme immunoassay and virus isolation. Journal of clinical microbiology 1994; 32(9): 2076-2080.

(456) Watts DM, et al. Aedes hendersoni: failure of laboratory infected mosquitoes to transmit LaCrosse virus (California encephalitis group). Journal of medical entomology 1975; 12(4): 451-453.

(457) Watts DM, et al. Laboratory transmission of LaCrosse encephalitis virus by several species of mosquitoes. Journal of medical entomology 1973; 10(6): 583-586.

(458) Watts DM, et al. Transmission of Lacrosse virus (California encephalitis group) by the mosquito Aedes triseriatus. Journal of medical entomology 1972; 9(2): 125-127.

(459) Watts DM, et al. Transovarial transmission of LaCrosse virus (California encephalitis group) in the mosquito, Aedes triseriatus. Science, USA 1973; 182(4117): 1140-1141.

(460) Watts DM, et al. Transovarial transmission of lacrosse virus in aedes triseriatus. Pathobiology of Invertebrate Vectors of Disease 1975; 266(1): 135-143.

(461) Watts DM, et al. Overwintering of La Crosse virus in Aedes triseriatus. American Journal of Tropical Medicine and Hygiene 1974; 23(4,I): 694-700.

(462) West Virginia Department of Health. West Virginia Mosquito-Borne Disease Surveillance Report, 2010. West Virginia Department of Health 2010.

(463) West Virginia Department of Health. West Virginia Mosquito-Borne Disease Surveillance Report, 2011. West Virginia Department of Health; 2011.

(464) West Virginia Department of Health. West Virginia Mosquito-Borne Disease Surveillance Report, 2012. West Virginia Department of Health and Human Resources; 2012.

(465) West Virginia Department of Health. 2014 West Virginia Mosquito-borne Disease Surveillance Summary. West Virginia Department of Health; 2014.

(466) West Virginia Department of Health. West Virginia Vectorborne Disease Surveillance Report January 1-November 9, 2015. West Virginia Department of Health 2015.

(467) Westby KM, et al. La Crosse encephalitis virus infection in field-collected Aedes albopictus, Aedes japonicus, and Aedes triseriatus in Tennessee. Journal of the American Mosquito Control Association 2015; 31(3): 233-241.

(468) Westby KM, Muturi EJ, Juliano SA. How do nutritional stress and la crosse virus infection interact? Tests for effects on willingness to blood feed and fecundity in Aedes albopictus (Diptera: Culicidae). Journal of medical entomology 2016; 53(1): 166-171.

(469) White LA. Susceptibility of Aedes albopictus C6/36 cells to viral infection. Journal of clinical microbiology 1987; 25(7): 1221-1224.

(470) Winkler CW, et al. Capillaries in the olfactory bulb but not the cortex are highly susceptible to virus-induced vascular leak and promote viral neuroinvasion. Acta Neuropathologica 2015; 130(2): 233-245.

(471) Wisconsin Division of Public Health (DPH). West Nile and Other Arboviral Surveillance in Wisconsin 2005 Final Report. Wisconsin Division of Public Health (DPH); 2005.

(472) Wisconsin Division of Public Health (DPH). West Nile and Other Arboviral Surveillance in Wisconsin 2006, Final Report Wisconsin Division of Public Health (DPH); 2006.

(473) Wisconsin Division of Public Health (DPH). West Nile and Other Arboviral Surveillance in Wisconsin 2007 Final Report; 2007.

(474) Wisconsin Division of Public Health (DPH). West Nile and Other Arboviral Surveillance in Wisconsin 2008 Final Report. Wisconsin Division of Public Health (DPH); 2009.

(475) Wisconsin Division of Public Health (DPH). California Serogroup Virus Cases by County, 2008-2015. Wisconsin Division of Public Health (DPH); 2016.

(476) Wong YW, et al. Surveillance of arbovirus activity in Iowa during 1972-1975. Mosquito News 1978; 38(2): 245-251.

(477) Woodring J, et al. Diapause, transovarial transmission, and filial infection rates in geographic strains of La Crosse virus-infected Aedes triseriatus. American Journal of Tropical Medicine and Hygiene 1998; 58(5): 587-588.

(478) Woodruff BA, Baron RC, Tsai TF. Symptomatic la crosse virus infections of the central nervous system: A study of risk factors in an endemic area. American Journal of Epidemiology 1992; 136(3): 320-327.

(479) World Health Organization. Virus diseases. Arboviral infections of the central nervous system. Weekly Epidemiological Record 1989; 64(7): 49-51.

(480) Wright RE, et al. Isolations of LaCrosse virus of the California group from Tabanidae in Wisconsin. In: Mosquito News, 1970: pp. 600-603. (vol. 4.).

(481) Wurtz R, Paleologos N. La Crosse encephalitis presenting like herpes simplex encephalitis in an immunocompromised adult. Clinical Infectious Diseases 2000; 31(4): 1113-1114.

# S3. General characteristics of the 481 primary research articles on La Crosse virus (LACV) included in the scoping review.

| **Category** | **N** | **%** |
| --- | --- | --- |
| **Type of document** |  |  |
| Primary peer-reviewed | 376 | 78.2% |
| Grey literature with primary data | 90 | 18.7% |
| Conference abstract (sufficient data) | 8 | 1.7% |
| Thesis | 7 | 1.5% |
| **Continent** |  |  |
| North America | 437 | 90.9% |
| Europe | 43 | 8.9% |
| Central America | 1 | 0.2% |
| **Date of Publication** |  |  |
| Before 1979 | 70 | 14.6% |
| 1980-1989 | 125 | 26.0% |
| 1990-1999 | 78 | 16.2% |
| 2000-2009 | 106 | 22.0% |
| 2010-2016 | 102 | 21.2% |
| **LACV study focus*** |  |  |
| Epidemiology | 216 | 44.9% |
| Describes surveillance activities | 114 | 23.7% |
| *In vitro* virus research1 | 124 | 25.8% |
| Transmission of LACV and vector competence | 90 | 18.7% |
| Pathogenesis in humans or animal hosts | 88 | 18.3% |
| Disease pathology | 82 | 17.0% |
| Infection mechanism | 5 | 1.0% |
| Immune response | 15 | 3.1% |
| Animal pathogenesis model | 34 | 7.1% |
| Accuracy of diagnostic tests | 42 | 8.7% |
| Treatment efficacy | 17 | 3.5% |
| Prevention and control strategies/ Interventions | 15 | 3.1% |
| Social impacts: knowledge and perception of LACV | 1 | 0.2% |
| Economic analysis | 3 | 0.6% |
| **Population Studied*** |  |  |
| Humans | 174 | 36.2% |
| Animal hosts | 107 | 22.2% |
| Natural infection | 31 | 6.4% |
| Experimental infection | 78 | 16.2% |
| Vectors | 154 | 32.0% |
| Mosquito vector | 153 | 31.8% |
| Non-mosquito vector | 2 | 0.4% |
| Virus only | 146 | 30.4% |
| **Study Design*** |  |  |
| Observational | 220 | 45.7% |
| Surveillance programme/monitoring | 117 | 24.3% |
| Prevalence survey | 46 | 9.6% |
| Case series/case report | 29 | 6.0% |
| Population based case series | 4 | 0.8% |
| Longitudinal | 8 | 1.7% |
| Cross sectional | 20 | 4.2% |
| Cohort | 4 | 0.8% |
| Case control | 6 | 1.2% |
| Sentinel animals | 6 | 1.2% |
| Experimental | 242 | 50.3% |
| Challenge trial | 161 | 33.5% |
| Controlled trial | 10 | 2.1% |
| Molecular characterisation | 90 | 18.7% |
| Molecular epidemiology | 8 | 1.7% |
| Evaluation of diagnostic tests | 42 | 8.7% |
| Economic model | 1 | 0.2% |
| Qualitative | 2 | 0.4% |

*Total may not add to 100% as studies can be classified in more than one category

1*In vitro* LACV research included studies that only examined the virus itself. This could include pathogenesis, transmission, and diagnostic test accuracy studies using only virus cell cultures.

# S4. Supplementary table of references associated with key research categories described in the results section and tables of the scoping review.

| Topic Category | Number of studies | References1 |
| --- | --- | --- |
| La Crosse Virus Studies |  |  |
| Molecular Epidemiology outcomes | 8 | Klimas 1981, Huang 1995, Huang 1997, Armstrong 2006, Lambert 2015, Bennett 2007, Reese, 2008, Reese, 2010, |
| Three lineages | 3 | Lambert 2015, Klimas 1981, Armstrong 2011 |
| Lineage 1 associated with fatal human disease | 4 | Bennett 2008, Huang 1995, Huang 1997, Lambert 2015 |
| Phylogeny and viral mutations | 8 | Lambert 2015, Baldridge 1989, Bennett 2007, Reese 2008, Reese 2010, El Said 1979, Borucki 1998, Forrester 2012 |
| LACV vectors |  |  |
| Significant risk factors (Table 2) |  |  |
| Geography: High risk clusters in north central/eastern USA | 2 | Reese 2010, Trout Fryxell 2015 |
| Increased chipmunk density and Increased ground cover density | 1 | Lisitza 1977 |
| Increased risk in August vs. July | 3 | Scheidler 2006 |
| Vector behaviour association with LACV infection |  |  |
| probing | 4 | Patrican 1985a, Paulson 1987, Paulson 1992, Grimstad 1980 |
| feeding success or size | 5 | Grimstad 1985, Bevins 2008, Jackson 2012, Westby 2016, Grimstad 1980 |
| blood meal preferences | 2 | Lancaster 2005, Westby 2015 |
| diapause (period of arrested development in response to environmental conditions) | 2 | McGaw 1998, Woodring 1998 |
| grooming | 1 | Paulson, 1987 |
| time of feeding | 1 | Watts et al, 1974 |
| Impact of dual infection with LACV and other pathogens | 4 | Kramer 1983, Beaty 1985, Chandler 1991, Beaty 1983a, Patrican 1985 |
| Diagnostic test accuracy studies for vectors with extractable outcomes | 8 | Grimstad1983, Hildreth 1983, Hildreth 1982, Kempf 2006, Kuno 1996, Lambert 2005, Landry 1988, Vodkin1994, Wasieloski 1994 |
| LACV hosts |  |  |
| Significant risk factors (Table 2) |  |  |
| Increased risk in high quality habitats | 1 | Gauld 1974 |
| Increased risk for chipmunks vs. squirrels | 1 | Lancaster 2005 |
| LACV Seropositive Host (Table 3) |  |  |
| White-tailed deer  (*Odocoileus virginianus*)1 | 2 | Boromisa 1987, Hoff 1973, Issel 1972, Murphy 1989, Nagayama 2001, Neitzel 1991, Walker 1993 |
| Mule deer (O*docoileus hemionus*) | 2 | Hoff 1973, Campbell 1989) |
| Red fox (V*ulpes fulva*)1 | 1 | Amundson 1980 |
| Grey fox (*Urocyon cinereoargenteus*) | 1 | Amundson 1980 |
| *Procyon lotor* | 3 | Amundson 1980, Clark 1986, Papadopoulos 1970 |
| Eastern cottontail rabbits *(Sylvilagus floridanus)* | 1 | Dressler 1988 |
| Rabbits (species not reported | 1 | Papadopoulos 1970 |
| Gray squirrels (*Sciuris carolinensis*)1 | 4 | Balfour 1976, Lancaster 2005, Walker 1993, Lobo 2001 |
| Fox squirrel (*S. niger*)1 | 1 | Lancaster 2005 |
| Species not reported | 1 | Westby 2015 |
| Eastern chipmunks  (*Tamias striatus*)1 | 9 | Berry 1975, Landry 1988, Lancaster 2005, Gauld 1974, Walker 1993, Cully 1991, Gauld 1975, Kitron 1998 |
| Species not reported | 1 | Balfour 1976 |
| *Marmota monax1* | 1 | Berry 1975 |
| *Canis familiaris3* | 3 | Godsey 1988, Black 1994, Tatum 1999 |
| *Sus domesticus3* | 1 | Godsey 1988 |
| *Equus caballus3* | 2 | Godsey 1988, Berry 1975 |
| *Bos taurus3* | 1 | Godsey 1988 |
| Isolation of LACV in hosts (Table 3) |  |  |
| gray squirrels (*S. carolinensis*) | 2 | Ksiazek 1977b, Ksiazek 1977a |
| eastern chipmunks (*T. striatus*) | 3 | Ksiazek 1977b, Ksiazek 1977a, Landry 1988 |
| Successful host to vector transmission |  |  |
| Chipmunk | 5 | Berry 1986, Amundson 1980, Cully 1992, Patrican 1985b, Thompson 1983 |
| Hamster | 1 | Sardelis 2002 |
| Mouse | 3 | Watts 1975, Pantuwatana 1972, Berry 1986 |
| Dogs | 1 | Godsey 1988 |
| Fox | 1 | Amundson, 1980 |
| Unsuccessful host to vector transmission in deer | 1 | Osorio 1996 |
| Host to Host transmission: chipmunk to fox | 1 | Amundson 1980 |
| Diagnostic test accuracy studies in hosts with extractable outcomes | 2 | Beaty 1982b, Karabatsos 1980 |
| Human LACV |  |  |
| Significant risk factors (Table 2) |  |  |
| Demographics |  |  |
| Prevalence of LACV antibodies increases with age | 3 | Grimstad 1984, Szumlas 1996, Monath 1970 |
| Increased risk for males vs. females | 1 | Monath 1970 |
| Increased risk if less than high school degree | 1 | Haddow 2011b |
| Geography: Increased risk identified in certain counties from Illinois and Minnesota | 2 | Balfour 1976, Kitron 1997 |
| Geography: Southern states at greater risk vs. northern states in USA | 1 | Haddow 2009 |
| Increased risk in rural areas vs. urban | 1 | Monath 1970 |
| Increased risk on reservation vs. off reservation | 1 | Szumlas 1996 |
| Increased risk if area with lower housing density | 1 | Haddow 2011b |
| Children at increased risk if spent >1 hour in woods during the day | 1 | Woodruff 1992 |
| Increased risk with more hours spent outdoors | 1 | Erwin 2002 |
| Slight increased risk if child never wore repellent | 1 | Woodruff 1992 |
| Increased risk in children living in homes with no air conditioning | 1 | Woodruff 1992 |
| Increased risk if tree holes near residence | 2 | Woodruff 1992, Erwin 2002 |
| Increased risk the closer residence is to forest edge | 1 | Woodruff 1992 |
| Increased risk if artificial containers near residence | 2 | Woodruff 1992, Hedberg 1985 |
| Children were at increased risk if >10 tires near residence | 1 | Woodruff 1992 |
| Season: Increased risk in June-August and October vs. March-May, September and November | 1 | Haddow 2009 |
| Season: Increased risk in July to Sept compared to all other months | 1 | Kitron 1997 |
| Increased disease progression if patient presented with vomiting, seizure, coma, fever, and low sodium | 1 | McJunkin 2001 |
| Case fatalities from LACV | 29 | Berry 1984, Bice 2013, Chun 1983, Copps 1969, Gundersen 1983, Lambert 2015, McJunkin 2001, Miller 2012, Sotir 2007, Robinson 2003, Cooper 2006, West Virginia Department of Health 2014, CDC 2013, CDC 2012, Lindsey 2015, Lindsey 2014, Gaensbauer 2014, Balfour 1974, Balfour 1973, Robinson 2002, Cooper 2005, Cooper 2008, Levine 2015, CDC 1988, Haddow 2011a, Beaty 1982a, Andre 1985, Haddow 2009, Kentucky Department for Public Health 2002 |
| Proportion of hospitalizations of LACV cases | 29 | Bice 2013, CDC 2013, CDC 2012, Lindsey 2014, Lindsey 2015, Gaensbauer 2014, Balfour 1974, Balfour 1973, Jones 2000, CDC 1988, Teleron 2016, West Virginia Department of Health 2014, Boyce 1998, CDC 2010, Lambert 2015, McJunkin 1997, McJunkin 2001, Miller 2012, Monath 1970, Sokol 2001, Sotir 2007, Utz 2005, Utz 2003, Woodruff 1992, Wurtz 2000, West Virginia Department of Health 2010, Wisconsin Division of Public Health 2009, Sikes 1984 |
| Proportion of hospitalized LACV cases in intensive care | 2 | Miller 2012, McJunkin 1997 |
| Pathogenesis of LACV in humans | 18 | de los Reyes 2008, Erwin 2002, Gundersen 1983, Haddow 2011a, Jones 1999, Kobayashi 2011, McJunkin 1997, McJunkin 2001, Miller 2012, Sokol 2001, Teleron 2016, Thompson 1983, Wurtz 2000, Kelsey 1978 |
| Diagnostic test accuracy for humans |  |  |
| immunodiffusion | 2 | Papadopoulos 1970, Balfour 1974 |
| counter immunoelectrophoresis | 4 | Balfour 1974, Lindsey 1978, Beaty 1983b, Lindsey 1977 |
| serum dilution neutralisation | 1 | Lindsey 1978 |
| in-direct fluorescent antibody | 1 | Chandler 1998 |
| reverse transcription polymerase chain reaction | 2 | Chandler 1998, Lambert 2005 |
| nucleic acid sequence based amplification | 1 | Lambert 2005 |
| Treatment |  |  |
| ribavirin | 4 | Cassidy 1989, Gowen 2007, Toltzis 1988, McJunkin 2011 |
| cycloheximide | 3 | Raju 1988, Raju 1987, Raju 1986 |
| WP1130 | 2 | Gonzalez-Hernandez 2014, Perry 2012 |
| puromycin | 2 | Raju 1987, Raju 1986 |
| pactamycin | 2 | Raju 1987, Raju 1986 |
| iposomes, IFN-ß and Poly (I·C) | 1 | Taylor 2013 |
| Interventions |  |  |
| Vaccine candidates | 8 | Powers 1994, Keil 2015, Joyce 2011, Bennett 2012, Operschall 1999, Pavlovic 2000, Pekosz 1995, Schuh 1999 |
| Control of LACV in vectors | 3 | Glaser 2010, Eastep 2012, Powers 1996 |
| Personal protective measures (humans) | 4 | Thompson 1983, Sotir 2007, Wisconsin Division of Public Health 2006, Maryland Department of Health and Mental Hygiene 2001 |
| Social and Economic Burden | 4 | Utz 2003, Clark 1983, Lee 2002, Utz 2005 |

1 Please refer to supplementary material S2 for the citation list of included articles.

# S5. Fifty-six mosquito and seven non-mosquito vector species from 153 experimental and observational studies

| **Vector** | All Study Designs | Observational Study Design (n=62) | | |
| --- | --- | --- | --- | --- |
| **Total studies**  **N** | **Total studies**  **N (%)** | **N studies reporting LACV positive** | **Reference1**  **(LACV positive)** |
| **Mosquitos** | **153** |  |  |  |
| **Aedes species** |  |  |  |  |
| *Ae. triseriatus* | 131 | 53 (85.5) | 38 | Ref2 |
| *Ae. albopictus* | 33 | 20 (32.3) | 5 | Barker 2003, Erwin 2002, Lambert 2010, W. Virginia 2014, Gerhardt 2001 |
| *Ae. japonicus* | 14 | 10 (16.1) | 1 | Harris 2015 |
| *Ae. hendersoni* | 13 | 6 (9.7) | 1 | Mitchell 1998 |
| *Ae. vexans* | 13 | 11 (17.7) | 0 |  |
| *Ae. trivittatus* | 11 | 10 (16.1) | 1 | Thompson 1972 |
| *Ae. canadensis* | 9 | 8 (12.9) | 2 | Berry 1986, Nasci 2000 |
| *Ae. cinereus* | 6 | 5 (8.1) | 0 |  |
| *Ae. communis* | 5 | 4 (6.5) | 1 | Thompson 1972 |
| *Ae. aegypti* | 5 | 0 (0.0) | N/A |  |
| *Ae. stimulans* | 5 | 4 (6.5) | 0 |  |
| *Ae. zoosophus* | 2 | 0 (0.0) | N/A |  |
| *Ae. atropalpus* | 2 | 1 (1.6) | 0 |  |
| *Ae. brelandi* | 2 | 0 (0.0) | N/A |  |
| *Ae. punctor* | 2 | 2 (3.2) | 0 |  |
| *Ae. dianteus* | 2 | 2 (3.2) | 0 |  |
| *Ae. informatus* | 1 | 1 (1.6) | 1 | Boyd 1978 |
| *Ae. sticticus* | 1 | 1 (1.6) | 0 |  |
| *Ae. nigromaculis* | 1 | 1 (1.6) | 0 |  |
| *Ae. barberi* | 1 | 1 (1.6) | 0 |  |
| *Ae. taeniorhynchus* | 1 | 0 (0.0) | N/A |  |
| *Ae. dorsalis* | 1 | 1 (1.6) | 0 |  |
| *Ae. flavescens* | 1 | 1 (1.6) | 0 |  |
| *Ae. aurifer* | 1 | 1 (1.6) | 0 |  |
| *Ae. intrudens* | 1 | 1 (1.6) | 0 |  |
| *Ae. implicatus* | 1 | 1 (1.6) | 0 |  |
| *Ae. provocans* | 1 | 1 (1.6) | 0 |  |
| *Ae. abserratus-punctor* | 1 | 1 (1.6) | 0 |  |
| *Ae. atlanticus* | 1 | 1 (1.6) | 0 |  |
| *Ae. tormentor* | 1 | 1 (1.6) | 0 |  |
| *Ae. excrucians* | 1 | 1 (1.6) | 0 |  |
| *Ae. nigromaculis* | 1 | 0 (0.0) | N/A |  |
| *Ae. hendersoni/triseriatus hybrid* | 1 | 0 (0.0) | N/A |  |
| **Culex species** |  |  |  |  |
| *Cx. pipiens/restuans* | 15 | 14 (22.6) | 4 | Camille Harris 2015, Erwin 2002, Thompson 1972, W. Virginia 2014 |
| *Cx. erraticus* | 7 | 7 (11.3) | 0 |  |
| *Cx. territans* | 3 | 3 (4.8) | 0 |  |
| *Cx. tarsalis* | 2 | 2 (3.2) | 0 |  |
| *Cx. salinarus* | 1 | 1 (1.6) | 0 |  |
| *Cx. fatigans* | 1 | 0 (0.0) | N/A |  |
| *Cx. quinquefasciatus* | 1 | 1 (1.6) | 0 |  |
| **Anopheles species** |  |  |  |  |
| *An. punctipennis* | 11 | 10 (16.1) | 0 |  |
| *An. quadrimaculatus* | 6 | 6 (9.7) | 0 |  |
| *An. walkeri* | 3 | 3 (4.8) | 0 |  |
| *An. crucians* | 1 | 1 (1.6) | 0 |  |
| *An. earlei* | 1 | 1 (1.6) | 0 |  |
| **Phosphora species** |  |  |  |  |
| *Ps. ferox* | 2 | 2 (3.2) | 0 |  |
| *Ps. columbiae* | 2 | 2 (3.2) | 0 |  |
| *Ps. signipennis* | 1 | 0 (0.0) | N/A |  |
| *Ps. ciliata horrida* | 1 | 1 (1.6) | 0 |  |
| **Culiseta species** |  |  |  |  |
| *Cs. morsitans* | 3 | 3 (4.8) | 0 |  |
| *Cs. inornata* | 5 | 3 (4.8) | 0 |  |
| *Cs. impatiens* | 1 | 1 (1.6) | 0 |  |
| **Other species** |  |  |  |  |
| *Uranotenia sapphirina* | 4 | 4 (6.5) | 0 |  |
| *Toxorhynchites rutilus* | 1 | 1 (1.6) | 0 |  |
| *Orthopodomyia signifera* | 4 | 4 (6.5) | 1 | Erwin 2002 |
| *Coquillettidia perturbans* | 7 | 7(11.3) | 0 |  |
| Not identified | 10 | 7 (11.3) | 5 | W. Virginia 2014, Nasci 1996, Gabel 2010, Texas 2014, Mark-Carew 2013 |
| **Non-mosquito** | **2** |  |  |  |
| **Horse fly species** |  |  |  |  |
| *Hybomitra lasiophthalma* | 1 | 1 (1.6) | 1 | Wright 1970 |
| *Hy. illota* | 1 | 1 (1.6) | 0 |  |
| *Hy. epistates* | 1 | 1 (1.6) | 0 |  |
| *Hy. typhus* | 1 | 1 (1.6) | 0 |  |
| *Hy. nuda* | 1 | 1 (1.6) | 0 |  |
| **Deer fly species** |  |  |  |  |
| *Chrysops excitans* | 1 | 1 (1.6) | 0 |  |
| **Fruit fly species** |  |  |  |  |
| *Drosophila melanogaster* | 1 | 0 (0.0) | N/A |  |

N/A = not applicable as the study did not test for natural LACV exposure or infection

*Total may not add to 100% as a single study may contain results for more than one species

1 Please refer to supplementary material S2 for the citation list of included articles.

2 Reese 2008, Armstrong 2006, Lambert 2015, Andre 1985, Balfour 1975, Balfour 1976, Barker 2003, Beaty1975, Berry 1974, Berry 1975, Berry 1986, Clark 1983b, Clark 1982, Erwin 2002, Freyman 2013, Kappus 1982, Lambert 2010, Landry 1988, Lisitza 1977, Mitchell 1998, Nasci 2000, Pantuwatana 1974, Pinger 1983, Pinger 1980, Reese 2010, Rowley 1979, Rowley 1973, Scheidler 2006, Szumlas 1996b, Thomas 1982, Thompson 1972, Trout Fryxell 2015, Watts 1973, Watts 1974, Westby 2011, Wong 1978, W. Virginia 2011, W. Virginia 2014

3 Glaser, 2010

# S6. The number and percent of articles reporting competence outcomes for the transmission of La Crosse virus in mosquito vectors infected by various modes (N=80).

| **Outcome** | **Mode of Infection** | **N*** | % |
| --- | --- | --- | --- |
| Minimum/midgut infection rate1 (n=63) | Blood meal | 55 | 68.8% |
| Vertical | 28 | 35.0% |
| Inoculated (intrathoracically)2 | 15 | 18.8% |
| Venereal | 6 | 7.5% |
| Dissemination rate3 (n=28) | Blood meal | 26 | 32.5% |
| Vertical | 8 | 10.0% |
| Inoculated (intrathoracically) | 3 | 3.8% |
| Venereal | 2 | 2.5% |
| Transmission rate4 (n=42) | Blood meal | 37 | 46.3% |
| Vertical | 16 | 20.0% |
| Inoculated (intrathoracically)2 | 11 | 13.8% |
| Venereal | 6 | 7.5% |
| Impact of genetics/genetic changes (n=14) | Blood meal | 13 | 16.3% |
| Vertical | 8 | 10.0% |
| Inoculated (intrathoracically) | 4 | 5.0% |
| Impact on mosquito reproduction (n=8) | Blood meal | 8 | 10.0% |
| Vertical | 4 | 5.0% |
| Inoculated (intrathoracically) | 3 | 3.8% |
| Venereal | 1 | 1.3% |
| Survival rate (n=6) | Blood meal | 5 | 6.3% |
| Vertical | 2 | 2.5% |
| Inoculated (intrathoracically) | 4 | 5.0% |
| Venereal | 1 | 1.3% |
| Impact of LACV infection on body size/wing length (n=6) | Blood meal | 5 | 6.3% |
| Vertical | 1 | 1.3% |
| Other5 (n=8) | Blood meal | 9 | 11.3% |
| Vertical | 5 | 6.3% |
| Inoculated (intrathoracically) | 4 | 5.0% |
| Venereal | 1 | 1.3% |

*Total may not add to 100% as studies may have reported results for multiple outcomes

1 Infection rate defined as virus present only in midgut

2 Mosquitoes inoculated intrathoracically, except one study (Miller 1978) which submerged mosquitoes in a viral suspension

3 Dissemination rate defined as when the virus spreads from the midgut to the head, thorax, legs etc.

4 Transmission rate defined as virus present in saliva

5 Other outcomes include: nutritional stress (n=2) (Camille Harris 2015, Patrican 1985), sex/life stage (n=2) (Patrican 1985, Kramer 1983), salivation rate (n=2) (Paulson 1987, Thompson 1979), gut microbiota (n=1) (Muturi 2016), re-feeding rate (n=1) (Turell 1985), diapause rate (n=1) (Woodring 1998)

# S7. Incubation period and viremic period of experimental La Crosse virus (LACV) infection by animal host (N=20)

| **Category** | **HostCategory** | **Range of days** | **Reference3** |
| --- | --- | --- | --- |
| Incubation period1 | Mice | 0-4 | Beaty 1982b, Bennett 2008, Gonzalez-Scarano 1985, Janssen 1984, Johnson 1983, Lienenklaus 2009, Mukherjee 2013, Pekosz 1995 |
| Chipmunks | 1-6 | Watts 1975, Cully 1992, Pantuwatana 1972, Patrican 1985, Seymour 1983 |
| Deer | 2-5 | Issel 1972a, Osorio 1996a |
| Rabbits | 2 | Osorio 1996b |
| Squirrels | 2-4 | Pantuwatana 1972 |
| Pigs | 1-2 | Godsey 1988 |
| Dogs | 1-2 | Godsey 1988 |
| Fox | 1-2 | Amundson 1980 |
| Viremic period2 | Chipmunks | 1-7 | Pantuwatana 1972, Issel 1975, Seymour 1983, Patrican 1985, Osorio 1996a, Cully 1992 |
| Squirrels | 2-4 | Pantuwatana 1972, Issel 1975 |
| Mice | 1-3 | Pekosz 1995, Beaty 1982b |
| Deer | 1 | Issel 1972a |
| Rabbits | 2 | Seymour 1983 |
| Dogs | 1-3 | Godsey 1988 |
| Pigs | 1-3 | Godsey 1988 |
| Fox | 1-4 | Amundson 1980 |
| Gerbils | 2-6 | Cheng 1999 |

1Incubation period defined as the time between the experimental animal being exposed to infection and the onset of first symptoms

2Viremic period defined as the time the experimental animal is infectious

3 Please refer to supplementary material S2 for the citation list of included articles.

# S8: Clinical signs, symptoms and sequelae reported in LACV infected animal hosts (N=21)

| **Sign/Symptom/Sequelae** | **Animal** | **Type of Host** | **No. of Articles** | **Proportion (%) affected** | **Reference*1** |
| --- | --- | --- | --- | --- | --- |
| **Neurological** |  |  | **18** |  |  |
| Paralysis | Mice | Experimental | 7 | 22/22 (100%), NR | Hefti 1999, |
| Gerbils | Experimental | 1 | 4/10 (40%) | Osorio 1996b |
| Ataxia (loss of body control) | Mice | Experimental | 1 | NR |  |
| Dogs | Natural | 1 | 1/1 (100%) | Tatum 1999 |
| Lethargy | Dogs | Experimental | 1 | 1/8 (12.5%) | Godsey 1988 |
| Mice | Experimental | 1 | NR |  |
| Chipmunks | Experimental | 1 | 4/4 (100%) | Seymour 1983 |
| Tremors | Dogs | Natural | 1 | 5/6 (83.3%) | Godsey 1988 |
| Mice | Experimental | 2 | NR |  |
| Slow movement | Mice | Experimental | 3 | NR |  |
| Seizure | Mice | Experimental | 4 | NR |  |
| Dogs | Natural | 2 | 4/5 (80%) | Tatum 1999 |
| Arched back | Mice | Experimental | 1 | NR |  |
| Dogs | Experimental | 1 | 4/4 (100%) | Godsey 1988 |
| Not coordinated | Dogs | Both | 2 | 4/4 (100%), 1/1 (100%) | Godsey 1988, Tatum 1999 |
| Depression | Dogs | Natural | 1 | 1/1 (100%) | Tatum 1999 |
| Body twisting | Dogs | Natural | 1 | 1/1 (100%) | Tatum 1999 |
| Head tilt | Dogs | Natural | 1 | 1/1 (100%) | Tatum 1999 |
| Meningoencephalitis | Gerbils | Experimental | 1 | NR |  |
| Circled | Mice | Experimental | 1 | NR |  |
| Unresponsive | Mice | Experimental | 1 | NR |  |
| Not specified | Mice | Experimental | 8 | 22/22 (100%), NR | Hefti 1999 |
| Dogs | Natural | 1 | 1/1 (100%) | Tatum 1999 |
| **Other** |  |  | **8** |  |  |
| Weight loss | Mice | Experimental | 1 | NR |  |
| Rabbits | Experimental | 1 | NR |  |
| Respiratory | Mice | Experimental | 1 | NR |  |
| Dogs | Natural | 1 | 1/7 (14.3%) | Black 1994 |
| Fever | Dogs | Natural | 1 | 1/1 (100%) | Tatum 1999 |
| Anorexia | Dogs | Natural | 1 | 1/1 (100%) | Tatum 1999 |
| Decreased foot length | Rabbits | Experimental | 1 | NR |  |
| Inflammation | Mice | Experimental | 1 | NR |  |
| Pale | Mice | Experimental | 1 | NR |  |
| Fracture | Deer | Experimental | 1 | 1/11 (9.1%) | Issel 1972a |

NR = not reported

*References provided only if article reported the proportion affected

1 Please refer to supplementary material S2 for the citation list of included articles.

# S9. General characteristics of the articles (number and proportion) investigating human populations affected by La Crosse virus (N=174)

| **Category** | **N*** | **%** |
| --- | --- | --- |
| **Sampling frame** |  |  |
| General population | 138 | 79.3% |
| Hospital/clinic patients | 25 | 14.4% |
| At risk population 1 | 16 | 9.2% |
| Sample library | 7 | 4.0% |
| **Health Status** |  |  |
| Co-infection2 | 3 | 1.7% |
| Co-morbidity3 | 8 | 4.6% |
| **Age** |  |  |
| Child (≤18 years old) | 63 | 36.2% |
| Adult (≥19 years old) | 6 | 3.4% |
| Both | 23 | 13.2% |
| Not reported | 82 | 47.1% |
| **Type of sample** |  |  |
| Blood | 71 | 40.8% |
| Cerebrospinal fluid (CSF) | 15 | 8.6% |
| Tissue4 | 10 | 5.7% |
| Not reported | 101 | 58.0% |
| **Diagnostic test** |  |  |
| Immunoassay | 85 | 48.9% |
| Molecular | 6 | 3.4% |
| Virus isolation/culture | 6 | 3.4% |
| Not reported | 87 | 50.0% |
| **Study Design** |  |  |
| Observational | 160 | 92.0% |
| Surveillance reports | 112 | 64.4% |
| Case series | 27 | 15.5% |
| Cross sectional | 14 | 8.0% |
| Case control | 6 | 3.4% |
| Population based case series | 4 | 2.3% |
| Prevalence survey | 5 | 2.9% |
| Longitudinal study | 2 | 1.1% |
| Cohort | 3 | 1.7% |
| Controlled trial | 2 | 1.1% |
| Diagnostic test evaluation | 21 | 12.1% |
| Qualitative study | 2 | 1.1% |
| Economic models | 1 | 0.6% |

*Total may not add to 100% as studies can be categorized in more than one way

1At risk populations: occupation (n=3) (Boyd 1978, Adjemian 2012, Kosoy 2016), children (n=11) (Hinckley 2009, Fredia 2001, Kappus 1982, Balfour 1976, Boyce 1998, de los Reyes 2008, Hardin 2003, Jones 2000, McJunkin 2011, Miller 2012, Thompson 1983), developmental delay in children (Monath 1970, Gauld 1979) and adults (Gauld 1979) (n=2), pregnant (n=1) (Hinckley 2009)

2Co-infections: West Nile Virus (Levine 2015) and mixed viral infections including enteroviruses (Balfour 1974), adenovirus (type I) (Balfour 1974, Balfour 1973), echovirus (type 11, 25, 30)(Balfour 1973), mumps (Balfour 1974), and coxsackievirus B5 (Balfour 1973)

3Co-morbidities: endocrine disorder (Lindsey 2014, Hinckley 2009, Bice 2013, McJunkin 1997, Wurtz 2000), behavioral disorder (Balkhy 2000, Tatum 1999), seizure disorder (Balkhy 2000), neurological disorder (Kobayashi 2011), heart disease (Lindsey 2014), hypertension (Lindsey 2014), arthritis (Lindsey 2014)

4Tissues: brain (n=7) (McJunkin 2001, Lambert 2015, Fredia 2001, McJunkin 1997, Kobayashi 2011, Chandler 1998, Lambert 2005), nasopharyngeal (n=2) (Fredia 2001), umbilical cord and placenta (n=1) (Hinckley 2009), rectal (n=1) (Fredia 2001), not reported (n=1) (Minnesota 1998)

# S10. The number of cases and incidence rate of La Crosse virus (LACV) cases per 100000 person-years in the general human population captured through disease surveillance in the USA from 1963-2016 (N=130)

| **State** | **Year Sampled** | **Number of cases of LACV reported** | **Incidence rate* per 100000 person-years** | **Reference9** |
| --- | --- | --- | --- | --- |
| USA | 1991 | 38 | 0.02 | CDC 1992 |
| 2003-20121 | 754 | 0.032 | Gaensbauer 2014 |
| 2003-20121 | 665 children | 0.09 | Gaensbauer 2014 |
| 2004 | 117 | 0.042 | CDC 2016 |
| 2005 | 80 | 0.032 | CDC 2016 |
| 2006 | 67 | 0.022 | CDC 2016 |
| 2007 | 53 | 0.022 | CDC 2016 |
| 2008 | 53 | 0.022 | CDC 2016 |
| 2009 | 49 | 0.022 | CDC 2016 |
| 2010 | 75 | 0.022 | CDC 2016 |
| 20111 | 116 | 0.04 | CDC 2012 |
| 2011 | 130 | 0.04 | CDC 2012 |
| 2011 | 123children | 0.17 | CDC 2012 |
| 20121 | 71 | 0.02 | CDC 2013 |
| 2012 | 78 | 0.032 | CDC 2016 |
| 2012 | 65 children | 0.09 | CDC 2013 |
| 20131 | 77 | 0.02 | Lindsey 2014 |
| 2013 | 85 | 0.03 | Lindsey 2014, CDC 2016 |
| 2013 | 76 children | 0.16 | Lindsey 2014 |
| 20141 | 76 | 0.02 | Lindsey 2015 |
| 2014 | 80 | 0.03 | Lindsey 2015 |
| 2014 | 72 children | 0.10 | Lindsey 2015 |
| Alabama3 | 2000 | 1 | 0.02 | Alabama 2000 |
| 2001 | 1 | 0.02 | Alabama 2001 |
| 2005 | 1 | 0.022 | CDC 2016, Alabama 2005 |
| 20111 | 1 | 0.02 | CDC 2012, CDC 2016 |
| 20131 | 1 | 0.02 | Lindsey 2014, CDC 2016 |
| Florida | 2004 | 2 | 0.012 | CDC 2016 |
| 2006 | 1 | 0.014 | Shultz 2006, CDC 2016 |
| 2007 | 1 | 0.014 | Shultz 2007 |
| 2008 | 1 | 0.014 | CDC 2016, Radke 2009 |
| 20111 | 1 | 0.01 | CDC 2012, CDC 2016 |
| 20141 | 1 | 0.01 | Lindsey 2015, Florida 2016 |
| 2015 | 1 | 0.014 | Florida 2016 |
| Georgia | 1982 | 8 | 0.14 | Sikes 1984 |
| 2004 | 5 | 0.062 | CDC 2016 |
| 2005 | 1 | 0.012 | CDC 2016 |
| 2006 | 1 | 0.012 | CDC 2016 |
| 2007 | 2 | 0.022 | CDC 2016 |
| 2008 | 2 | 0.022 | CDC 2016 |
| 2009 | 2 | 0.022 | CDC 2016 |
| 2010 | 2 | 0.022 | CDC 2016 |
| 20111 | 2† | 0.02 | CDC 2012, Gabel 2012 |
| 20131 | 1† | 0.01 | Lindsey 2014, CDC 2016, Gabel 2014 |
| 20141 | 1 | 0.01 | Lindsey 2015 |
| 2014 | 2 | 0.022 | CDC 2016 |
| Illinois3 | 1966-1995 | 175 | 0.052 | Kitron 1997 |
| 1966-1980 | 61 | 0.036 | Clark 1983a |
| 19841 | 2 | 0.02 | WHO 1989 |
| 2004 | 9 | 0.072 | CDC 2016 |
| 2005 | 1 | 0.012 | CDC 2016 |
| 2007 | 1 | 0.012 | CDC 2016 |
| 2009 | 1 | 0.012 | CDC 2016 |
| Indiana | 1963-19831 | NR | 0.085 | WHO 1989 |
| 1982 | 12 | 0.22 | WHO 1989 |
| 19841 | 15 | 0.28 | WHO 1989 |
| 2000 | 2 | 0.03 | Indiana 2000 |
| 2002 | 4 | 0.06 | Indiana 2002 |
| 2003 | 3 | 0.05 | Indiana 2003 |
| 2004 | 2 | 0.032 | CDC 2016 |
| 2004 | 1 | 0.02 | Indiana 2004 |
| 2005 | 1 | 0.022 | CDC 2016 |
| 2006 | 3 | 0.052 | CDC 2016 |
| 2009 | 1 | 0.02 | CDC 2016, Cierzniewski 2009 |
| 20111 | 2 | 0.03 | CDC 2012, CDC 2016 |
| 2011 | 3 | 0.05 | CDC 2012, La Netta 2014 |
| 20121 | 2 | 0.03 | CDC 2013 |
| 2012 | 3 | 0.05 | CDC 2013, LaNetta 2014 |
| 20131 | 1 | 0.02 | Lindsey 2014, La Netta 2015 |
| 2014 | 2 | 0.03 | LaNetta 2015 |
| Iowa | 1963-19831 | NR | 0.145 | WHO 1989 |
| 1972-1975 | 20† | 0.182 | Wong 1973 |
| 1975 | 12 | 0.42 | Rowley 1979 |
| 19781 | 18 | 0.62 | Andre 1985 |
| 19791 | 6 | 0.21 | Andre 1985 |
| 19801 | 8 | 0.28 | Andre 1985 |
| 19841 | 7 | 0.24 | WHO 1989 |
| 2004 | 2 | 0.072 | CDC 2016 |
| 2006 | 1 | 0.032 | CDC 2016 |
| 2007 | 1 | 0.032 | CDC 2016 |
| Kentucky | 2002 | 3† | 0.05 | Kentucky 2002 |
| 2008 | 1 | 0.022 | CDC 2016 |
| 20111 | 1 | 0.02 | Chandler 1998, CDC 2012 |
| Louisiana | 2001 | 1 | 0.02 | Louisiana 2015 |
| 2002 | 1 | 0.02 | Louisiana 2015 |
| 2003 | 3 | 0.07 | Louisiana 2015 |
| 2004 | 3 | 0.072 | CDC 2016 |
| 2005 | 1 | 0.02 | CDC 2016, Louisiana 2015 |
| 2006 | 3 | 0.07 | CDC 2016, Louisiana 2015 |
| 2008 | 1 | 0.02 | CDC 2016, Louisiana 2015 |
| 2015 | 1 | 0.02 | Louisiana 2015 |
| Maryland | 2001 | 1 | 0.02 | Maryland 2010, Maryland 2001 |
| 2010 | 2 | 0.03 | Maryland 2010 |
| Michigan3 | 2004 | 1 | 0.012 | CDC 2016 |
| 2006 | 2 | 0.022 | CDC 2016 |
| 2010 | 2 | 0.02 | CDC 2016, Stobierski 2013 |
| 20111 | 1 | 0.01 | CDC 2016, CDC 2012 |
| Minnesota | 1963-19831 | NR | 0.35 | WHO 1989 |
| 1978 | 24 | 0.60 | Sjogren 1979 |
| 1979 | 45 | 1.11 | Hedberg 1985 |
| 1997 | 5† | 0.11 | Minnesota 1998 |
| 1998 | 4† | 0.09 | Minnesota 1999 |
| 1999 | 6† | 0.13 | Minnesota 2000 |
| 2000 | 8† | 0.16 | Minnesota 2001 |
| 2001 | 12† | 0.24 | Minnesota 2002 |
| 2002 | 13 | 0.26 | Minnesota 2004 |
| 2003 | 3 | 0.06 | Minnesota 2004 |
| 2004 | 2 | 0.04 | CDC 2016, Minnesota 2005 |
| 2005 | 2 | 0.04 | CDC 2016, Minnesota 2006 |
| 2006 | 1 | 0.02 | Minnesota 2007 |
| 2007 | 1 | 0.02 | CDC 2016, Minnesota 2008 |
| 2008 | 1 | 0.02 | CDC 2016, Minnesota 2009 |
| 2010 | 1 | 0.02 | CDC 2016, Minnesota 2011 |
| 20111 | 1 | 0.02 | CDC 2016, Minnesota 2012, CDC 2012 |
| 20121 | 4 | 0.07 | Minnesota 2013, CDC 2013 |
| 20131 | 4 | 0.07 | Lindsey 2014 |
| 2013 | 5 | 0.09 | CDC 2016, Minnesota 2015b, Lindsey 2014 |
| 2014 | 4 | 0.07 | Minnesota 2015a, Lindsey 2015 |
| 2015 | 1 | 0.02 | Minnesota 2016 |
| Mississippi | 1968 | 4† | NR | Monath 1970 |
| 1998-2007 | 12 | 0.042 | Mississippi 2008 |
| 2005 | 1 | 0.032 | CDC 2016 |
| 2008 | 3 | 0.10 | Mississippi 2009, CDC 2016 |
| 20121 | 1 | 0.03 | CDC 2016, CDC 2013 |
| 20131 | 2 | 0.07 | Lindsey 2014 |
| 2013 | 3 | 0.07 | CDC 2016, Lindsey 2014 |
| Missouri | 2009 | 1 | 0.02 | CDC 2010 |
| 2010 | 1 | 0.022 | CDC 2016 |
| New York | 19841 | 2 | 0.01 | WHO 1989 |
| 2010 | 1 | 0.012 | CDC 2016 |
| North Carolina3 | 1977-1979 | 12children | 2.275,6 | Kappus 1982 |
| 1977 | 4 | NR | Kelsey 1978 |
| 1984 | 3 | 0.05 | WHO 1989 |
| 1989-2001 | 25 | 0.032 | Utz 2005, Utz 2003 |
| 2003 | 26 | 0.31 | N. Carolina 2004 |
| 2004 | 13 | 0.15 | CDC 2016, N. Carolina 2004 |
| 2007 | 10 | 0.112 | CDC 2016 |
| 2008 | 9 | 0.102 | CDC 2016 |
| 2009 | 16 | 0.172 | CDC 2016 |
| 2010 | 22 | 0.232 | CDC 2016 |
| 20111 | 26 | 0.27 | CDC 2012, CDC 2016 |
| 20121 | 26 | 0.27 | CDC 2016, CDC 2013 |
| 20131 | 13 | 0.13 | CDC 2016, Lindsey 2014 |
| 20141 | 23 | 0.23 | CDC 2016, Lindsey 2015 |
| Ohio | 1963-19831 | 558† | 0.25 | WHO 1989 |
| 1963-1969 | 207 | 0.302 | Ohio 20169 |
| 1970-1979 | 236 | 0.222 | Ohio 20169 |
| 1980-1989 | 284 | 0.262 | Ohio 20169 |
| 1984 | 26 | 0.24 | WHO 1989 |
| 1990-1999 | 140 | 0.132 | Ohio 20169 |
| 2000 | 18 | 0.162 | Ohio 2016 |
| 2001 | 14 | 0.122 | Ohio 2016 |
| 2002 | 32 | 0.282 | Ohio 2016 |
| 2003 | 20 | 0.172 | Ohio 2016 |
| 2004 | 26 | 0.232 | CDC 2016, Ohio 2016 |
| 2005 | 15 | 0.132 | CDC 2016, Ohio 2016 |
| 2006 | 11 | 0.102 | CDC 2016, Ohio 2016 |
| 2007 | 9 | 0.082 | CDC 2016, Ohio 2016 |
| 2008 | 9 | 0.082 | CDC 2016, Ohio 2016 |
| 2009 | 5 | 0.042 | CDC 2016, Ohio 2016 |
| 2010 | 24 | 0.212 | CDC 2016, Ohio 2016 |
| 2011 | 50 | 0.432 | CDC 2016, Ohio 2016 |
| 20111 | 44 | 0.38 | CDC 2012 |
| 2012 | 14 | 0.122 | CDC 2016, Ohio 2016 |
| 20121 | 12 | 0.10 | CDC 2013 |
| 2013 | 16 | 0.142 | Ohio 2016 |
| 20131 | 14 | 0.12 | Lindsey 2014 |
| 2014 | 31 | 0.272 | Ohio 2016 |
| 20141 | 30 | 0.26 | Lindsey 2015 |
| 2015 | 24 | 0.212 | Ohio 2016 |
| 2016 | 9 | 0.082 | Ohio 2016 |
| Oklahoma | 19841 | 1 | 0.03 | WHO 1989 |
| South Carolina | 19841 | 1 | 0.03 | WHO 1989 |
| 2006 | 1 | 0.02 | CDC 2016, S. Carolina 2006 |
| 20111 | 1 | 0.02 | CDC 2012, CDC 2016 |
| 20121 | 1 | 0.02 | CDC 2013, CDC 2016 |
| 20131 | 1 | 0.02 | Lindsey 2014, CDC 2016 |
| 2015 | 1 | 0.02 | S. Carolina 2016 |
| Tennessee | 1996 | 1 | 0.02 | Robinson 2002, Robinson 2003, Cooper 2005 |
| 1997-2006 | 118 | 0.212 | Haddow 2009 |
| 1997 | 8 | 0.15 | Robinson 2002, Robinson 2003, Cooper 2005, Cooper 2006 |
| 1998 | 9 | 0.16 | Robinson 2002, Robinson 2003, Cooper 2005, Cooper 2006, Cooper 2007 |
| 1999 | 6 | 0.10 | Robinson 2002, Robinson 2003, Cooper 2005, Cooper 2006, Cooper 2007, Cooper 2009 |
| 2000 | 19 | 0.33 | Robinson 2002, Robinson 2003, Cooper 2005, Cooper 2006, Cooper 2007 |
| 2000-2009 | NRmedical claims | 0.045 | Jones 2013 |
| 2000-2009 | NRhealth department records | 0.15 | Jones 2013 |
| 2001 | 17 | 0.30 | Robinson 2002, Robinson 2003 Cooper 2005, Cooper 2006, Cooper 2007 |
| 2002 | 15 | 0.26 | Robinson 2002, Robinson 2003 Cooper 2005, Cooper 2006, Cooper 2007 |
| 2003 | 14 | 0.24 | Robinson 2002, Robinson 2003 Cooper 2005, Cooper 2006, Cooper 2007, Dreyzehner 2012 |
| 2004 | 13 | 0.22 | Robinson 2002, Robinson 2003 Cooper 2005, Cooper 2006, Cooper 2007, Dreyzehner 2012 |
| 2005 | 2 | 0.03 | Robinson 2002, Robinson 2003 Cooper 2005, Cooper 2006, Cooper 2007, Dreyzehner 2012 |
| 2006 | 7 | 0.11 | Robinson 2002, Robinson 2003 Cooper 2005, Cooper 2006, Cooper 2007, Cooper 2009, Dreyzehner 2012 |
| 2007 | 14 | 0.23 | Cooper 2007, Dreyzehner 2012 |
| 2008 | 6 | 0.10 | Cooper 2009, Cooper 2008, Dreyzehner 2012 |
| 2009 | 9 | 0.15 | CDC 2016, Cooper 2008, Dreyzehner 2012 |
| 2010 | 11 | 0.172 | CDC 2016, Dreyzehner 2012 |
| 20111 | 12 | 0.19 | CDC 2016, CDC 2012, Dreyzehner 2012 |
| 20121 | 9 | 0.14 | CDC 2013, CDC 2016, Dreyzehner 2012 |
| 20131 | 23 | 0.35 | Lindsey 2014, CDC 2016 |
| 20141 | 11 | 0.17 | CDC 2016, Lindsey 2015 |
| Texas | 2010 | 1 | 0.0042 | CDC 2016 |
| 20121 | 3 | 0.01 | CDC 2013, Texas 2014, CDC 2016 |
| Virginia | 1994 | 1 | 0.022 | Virginia, 1994 |
| 1995 | 1 | 0.022 | Virginia, 1995 |
| 1996 | 2 | 0.032 | Virginia, 1996 |
| 1997 | 6 | 0.092 | Virginia, 1997 |
| 1998 | 3 | 0.042 | Virginia, 1998 |
| 2001 | 2 | 0.032 | Virginia, 2001 |
| 2002 | 2 | 0.032 | Virginia, 2002 |
| 2003 | 4 | 0.052 | Virginia, 2003 |
| 2004 | 2 | 0.032 | CDC 2016, Virginia 2004 |
| 2005 | 4 | 0.052 | CDC 2016, Virginia 2005 |
| 2008 | 2 | 0.032 | CDC 2016, Remley 2008 |
| 2009 | 1 | 0.012 | CDC 2016 |
| 2010 | 2 | 0.02 | Remley 2008 |
| 2011 | 1 | 0.012 | CDC 2016 |
| 20121 | 2 | 0.02 | CDC 2016, CDC 2013, Romero 2012 |
| 20131 | 2 | 0.02 | CDC 2016, Lindsey 2014 |
| 20141 | 2 | 0.02 | Lindsey 2015 |
| West Virginia3 | 1984 | 6 | 0.31 | Anon1988 |
| 1985 | 2 | 0.11 | Anon 1988 |
| 1987 | 19 | 1.022, 8 | Woodruff 1992, CDC 1988b, Anon 1988a |
| 1988 | 16 | 0.87 | Woodruff 1992 |
| 2004 | 30 | 1.652 | CDC 2016 |
| 2005 | 15 | 0.822 | CDC 2016 |
| 2003-2007 | 95 | 1.032 | Hinckley 2009 |
| 2007 | 11 | 0.602 | CDC 2016 |
| 2008 | 14 | 0.762 | CDC 2016 |
| 2009 | 14 | 0.762 | CDC 2016 |
| 2010 | 8† | 0.43 | W. Virginia 2010, W. Virginia 2011 |
| 2011 | 26† | 1.40 | W. Virginia 2011, W. Virginia 2014 |
| 20111 | 22 | 1.19 | CDC 2012 |
| 2012 | 14† | 0.75 | W. Virginia 2012, CDC 2016 |
| 20121 | 9 | 0.49 | CDC 2013 |
| 2013 | 11† | 0.59 | Lindsey 2014, CDC 2016 |
| 20131 | 10 | 0.54 | Lindsey 2014 |
| 2014 | 2† | 0.11 | W. Virginia 2014 |
| 20141 | 1 | 0.05 | Lindsey 2015, W. Virginia 2014 |
| 2015 | 3 | 0.16 | W. Virginia 2015 |
| Wisconsin | 1963-19831 | NR | 0.435 | WHO 1989 |
| 1965 | 14 | 0.332 | Copps & Elston 1969 |
| 19841 | 11 | 0.23 | WHO 1989 |
| 2002-2006 | 53 | 0.202 | Sotir 2007 |
| 2003 | 4 | 0.07 | Wisconsin 2005 |
| 2004 | 7 | 0.132 | CDC 2016 |
| 2005 | 4† | 0.072 | CDC 2016 |
| 2006 | 3 | 0.052 | CDC 2016, Wisconsin 2006 |
| 2007 | 7† | 0.122 | Wisconsin 2009, Wisconsin 2007 |
| 2008 | 4 | 0.072 | CDC 2016 |
| 2008 | 8† | 0.142 | Wisconsin 2009 |
| 2008-2015 | 25† | 0.06 | Wisconsin 2016 |
| 2009 | 1 | 0.022 | CDC 2016 |
| 2011 | 5 | 0.092 | CDC 2016 |
| 20111 | 2 | 0.04 | CDC 2012 |
| 20121 | 2 | 0.03 | CDC 2013, CDC 2016 |
| 2013 | 8 | 0.142 | CDC 2016 |
| 20131 | 5 | 0.09 | Lindsey 2014 |
| 20141 | 3 | 0.05 | Lindsey 2015 |

NR = Not reported

† Denotes some cases were considered probable cases; otherwise cases were confirmed or not specified as confirmed or sporadic

* Incidence rate was calculated as the number of new cases in a population during a specified time divided by the number of subjects at risk in the population at the beginning of the period. All population estimates (national or state) were obtained from USA Census Bureau data (<https://www.census.gov/programs-surveys/popest/data/tables.html>)

1 Reported by the author as neuroinvasive cases of LACV.

2 The incidence rate was calculated from case information.

3 Data not included in the table due to missing information (Date/represented population):

- Alabama: 1 probable case 1994 (Mancao 1996);
- Michigan: 2 confirmed cases (date not reported) (Abuhammour 2005);
- North Carolina: 1 confirmed case (date not reported) (Bice 2013); 2004-2009 47children (Miller, 2012)
- Tennessee: cluster of 10 cases 1997 (Jones 1999), 16 cases 2000 (Erwin 2002), 15 cases 2001 (population not defined) (Hardin 2003).
- West Virginia: 1 confirmed case (date not reported) (McJunkin 1997), 127 children 1987-1996 (McJunkin 2001); 1 confirmed case in a pregnant woman and a probable case for her newborn in 2006-2007 (2009);128 children 1987-1996 (McJunkin 2001, Kentucky 2002); 9 children 1992-1997 (McJunkin 1997), 10 cases 2001-2012 (Teleron 2016)
- Wisconsin: 29 cases 1960-1968 (Copps 1969); 1965-1982 178 children (Gundersen 1983); 33 cases 1979 (Beaty 1982a)
- Wisconsin/Minnesota/Iowa: 151 cases (Chun 1983) 178 cases 1965-1982 (Gundersen 1983);

4 All cases were reported as acquired from outside the state. Cases in Florida from 2006-2008 were acquired in North Carolina.

5 Median incidences per year as reported by the author.

6 The cases in this study were from a Cherokee Indian Reserve in Western North Carolina (Kappus 1982)

7 The cases in this study were diagnosed in La Crosse Wisconsin, however they came from the surrounding area that included Iowa and Minnesota (Gundersen 1983)

8 Incidence of 20/100000 in children <15 years old or 4.7/100000 for the whole population in the 5 county area (not whole state) where all the LACV cases occurred in 1987 (Woodruff 1992, Anon1988b, Anon 1988a)

9 Please refer to supplementary material S2 for the citation list of included articles.

# S11. The proportion of La Crosse virus (LACV) cases in patients with CNS or encephalitis studied in the USA from 1967-2008 (N=8).

| **State** | **Year Sampled** | **Population Characteristics** | **Prevalence data (positive/N)** | **Reference2** |
| --- | --- | --- | --- | --- |
| Minnesota | 19731 | CNS patients | 17/127 (13.4%) | Balfour & Edelman, 1974 |
| 1967-19721 | Encephalitis patients | 66/1617 (4.1%) | Balfour 1973, Balfour 1974 |
| New York | 1971-19821 | CNS patients | 18/327 (5.5%) | Srihongse 1984 |
| Tennessee | 2000-2002 | Encephalitis patients | 8/216 (3.7%) | Fredia 2001 |
| 2000-2007 | Encephalitis patients | 31/559 (5.5%) | Cooper 2007 |
| 2000- 2008 | Encephalitis patients | 31/598 (5.2%) | Cooper 2008 |
| Wisconsin | 19791 | Encephalitis patients | 26/67 (38.8%) | Beaty 1982a |
| 1 The denominator represents patients presenting with CNS infection or encephalitis during May/June through to October/November only.  2 Please refer to supplementary material S2 for the citation list of included articles. | | | | |

# S12. The seroprevalence of La Crosse virus (LACV) in humans from the USA from 1965-2010 (N=12).

| **State** | **Year Sampled** | **Population Sampled*** | **Seroprevalence (%)** | | **Reference4** |
| --- | --- | --- | --- | --- | --- |
| Indiana | 1978-1979 | General population | 370/10194 | (3.6) | Grimstad 1984 |
| Minnesota | 1971 | General population | 14/79 | (17.7) | Balfour 1976 |
| 1971 | Children (primary school) | 27/533 | (5.1) | Balfour 1976 |
| 1968 | General population1 | 136/1904 | (7.1) | Monath 1970 |
| 1968 | Developmental delay2 | 4/54 | (7.4) | Monath 1970 |
| New York | 1971-1982 | General population | 29/5013 | (5.8) | Srihongse 1984 |
| North Carolina | 1989-1990 | General population | 98/1016 | (9.7) | Szumlas 1996a |
| 1968 | Children (second grade) | 1/50 | (2.0) | Kappus 1982 |
| 1978 | Children (second grade) | 3/67 | (4.5) | Kappus 1982 |
| 1979 | General population | 6/53 | (11.3) | Kappus 1982 |
| Tennessee, North Carolina | 2008 | Park employees | 17/75 | (22.7) | Kosoy 2016, Adjemian 2012 |
| Tennessee | 1998-1999 | General population | 5/1000 | (0.5) | Balkhy 2000 |
| Texas | 1968-1970 | Outdoor workers | 6/49 | (12.3) | Boyd 1978 |
| Wisconsin | 1965-1976 | Developmental delay | 51/612 | (8.3) | Gauld 1979 |
| 1972-1973 | General population | 15/265 | (5.7) | Thompson 1983 |
| 1972-1973 | Children (<20 yrs of age) | 5/132 | (3.8) | Thompson 1983 |
| *All samples were tested for neutralizing antibodies to La Crosse virus  1General population seroprevalence was also investigated using plaque reduction neutralization test that was shown to cross react with Trivittatus virus and resulted in a seroprevalence of 276/1360 (20.3%) (Monath 1970)  2Develpmental delay population also tested with the plaque reduction neutralization test that cross reacted with Trivittatus virus and resulted in a seroprevalence of 14/54 (25.9% ) (Monath, 1970)  3 24/29 of the positive samples were also plaque reduction neutralization tests (PRNT) positive for Jamestown Canyon virus (Srihongse, 1984).  4 Please refer to supplementary material S2 for the citation list of included articles. | | | | | |

# S13: Clinical signs and symptoms reported in LACV infected humans (N=46)

| **Symptom** | **State** | **Sample Year** | | **Study Design(s)** | | **Population** | | **Proportion affected** | | | | **Reference1** |
| --- | --- | --- | --- | --- | --- | --- | --- | --- | --- | --- | --- | --- |
| **Neurological (n=46)** | | | | | | | | | | | | |
| Headache (n=27) | Alabama | 1994 | | Case series | | Clinical case, age 7 yr | | 1/1 | | 100% | | Mancao 1996 |
| Georgia | 1982 | | Surveillance | | Clinical case, age 0-10 yr | | 8/8 | | 100% | | Sikes 1984 |
| Illinois | NR | | Case series | | Clinical case, age 39 yr | | 1/1 | | 100% | | Wurtz 2000 |
| 1966-1980 | | Surveillance | | Clinical cases, age 0-14 yr | | 48/59 | | 81% | | Clark 1983a |
| Michigan | NR | | Case series | | Clinical cases, age 5 and 12 yr | | 2/2 | | 100% | | Abuhammour 2005 |
| Minnesota | 1967-1973 | | Case series | | CNS patients, age 0-19 yr | | NR | | NR | | Balfour 1974 |
| 1967-1972 | | Longitudinal | | CNS Patients, age 0-17 yr | | 43/57 | | 75.40% | | Balfour 1973 |
| Missouri | 2009 | | Case series | | Clinical case, age 8 yr | | 1/1 | | 100% | | CDC 2010 |
| North Carolina | 2004-2009 | | Case series | | Hospital patients, age 1-17 yr | | 45/47 | | 95.70% | | Miller 2012 |
| 1977 | | Case series | | Clinical case, age 7 yr | | 1/4 | | 25% | | Kelsey 1978 |
| 1977-1979 | | Population based, prevalence | | Children, age 2-9 yr | | 2/12 | | 16.70% | | Kappus 1982 |
| 2008 | | Case series | | Clinical case, age 12 yr | | 1/1 | | 100% | | Kobayashi 2011 |
| Ohio, West Virginia | 1992-1997 | | Case series | | Hospital patients, age 6-11 yr | | NR | | NR | | de los Reyes 2008 |
| Tennessee | NR | | Case series | | Clinical cases, age 10 and 14 yr | | 2/2 | | 100% | | Boyce 1978 |
| 2000 | | Cohort | | Hospital patients, mean age 7.5 year | | 15/15 | | 100% | | Erwin 2002 |
| 2001 | | Case control | | Hospital patients, age <18 yr | | 15/15 | | 100% | | Hardin 2003 |
| 1997 | | Population based | | Hospital patients, age 3-14 yr | | 9/10 | | 90% | | Jones 1999 |
| 1998-1999 | | Case series, prevalence | | Hospital patients | | 15/15 | | 100% | | Jones 2000 |
| West Virginia | 2006-2007 | | Case series | | Pregnant woman, age 43 yr | | 1/1 | | 100% | | Anon 2009 |
| NR | | Case series | | Clinical case, age 7 yr | | 1/1 | | 100% | | McJunkin 1997 |
| 1987-1996 | | Case series | | Hospital patients, age 0-15 yr | | 105/126 | | 83.30% | | McJunkin 2001 |
| 2001-2012 | | Population based | | Hospital patients, age >18 yr | | 7/10 | | 70% | | Teleron 2016 |
| Wisconsin | 1972-1973, 1977 | | Cohort, cross sectional | | General population, age 0-60+ | | 3/14 | | 21.40% | | Teleron 1983 |
| 1960-1968 | | Case series | | Clinical cases, age 1-11 yr | | 19/19 | | 100% | | Copps 1979 |
| 2002-2006 | | Surveillance | | Clinical case, age 1-83 yr | | 49/53 | | 92% | | Sotir 2007 |
| 2007 | | Surveillance | | Clinical case | | NR | | NR | | Wisconsin 2007 |
| 1965-1982 | | Case series | | Hospital patients, age 0-14 yr | | 114/178 | | 64% | | Gundersen 1983 |
| **Muscle and Mobility (n=27)** | | | | | | | | | | | | |
| Stiff neck (n=12) | Alabama | 1994 | | Case series | | Clinical case, age 7 yr | | 1/1 | | 100% | | Mancao 1996 |
| Illinois | 1966-1980 | | Surveillance | | Clinical cases, age 0-14 yr | | 34/59 | | 57.60% | | Clark 1983a |
| Missouri | 2009 | | Case series | | Clinical case, age 8 yr | | 1/1 | | 100% | | CDC 2010 |
| North Carolina | 2004-2009 | | Case series | | Hospital patients, age 1-17 yr | | 9/47 | | 19.10% | | Miller 2012 |
| Tennessee | 2000 | | Cohort | | Hospital patients, mean age 7.5 yr | | 9/15 | | 60% | | Erwin 2002 |
| 2001 | | Case control | | Hospital patients, age <18 yr | | 6/15 | | 40% | | Hardin 2003 |
| West Virginia | 2006-2007 | | Case series | | Pregnant, age 43 yr | | 1/1 | | 100% | | Anon 2009 |
| 1987-1996 | | Case series | | Hospital patients, age 0-15 yr | | 31/120 | | 25.80% | | McJunkin 2001 |
| 2003-2007 | | Predictive, surveillance | | Clinical cases, age 0-15 yr | | 32/96 | | 33.30% | | Haddow 2011 |
| 2001-2012 | | Population based | | Hospital patients, age >18 yr | | 3/10 | | 30% | | Teleron 2016 |
| Wisconsin | 2002-2006 | | Surveillance | | Clinical case, age 1-83 yr | | 32/33 | | 97% | | Sotir 2007 |
| 1965-1982 | | Case series | | Hospital patients, age 0-14 yr | | 80/178 | | 44.90% | | Gundersen 1983 |
| Paralysis/paresis (n=8) | USA | 2003-2012 | | Surveillance | | Clinical cases, age 0-18 yr | | 10/665 | | 1.50% | | Gaensbauer 2014 |
| 2013 | | Surveillance | | Clinical cases, age 4-11 yr | | 4/85 | | 4.71% | | Lindsey 2014 |
| Georgia | 1982 | | Surveillance | | Clinical case, age 0-10 yr | | 1/8 | | 12.50% | | Sikes 1984 |
| Illinois | 1966-1980 | | Surveillance | | Clinical cases, age 0-14 yr | | 5/59 | | 8.47% | | Clark 1983a |
| Minnesota | 1967-1972 | | Longitudinal | | CNS Patients, age 0-17 yr | | 1/57 | | 1.75% | | Balfour 1973 |
| Minnesota, Wisconsin, Ohio | NR | | Case series | | Clinical case, age 0-17 yr | | NR | | NR | | Chun 1983 |
| Wisconsin | 1960-1968 | | Case series | | Hospital patient, age 1-11 yr | | 3/19 | | 15.80% | | Copps 1979 |
| Reflexes (n=2) | Michigan | NR | | Case series | | Clinical case, age 5 and 12 yr | | 1/2 | | 50% | | Abuhammour 2005 |
| Wisconsin | 1960-1968 | | Case series | | Hospital patient, age 1-11 yr | | 4/19 | | 21.10% | | Copps 1979 |
| Weakness (n=8) | Alabama | 1994 | | Case series | | Clinical case, age 7 yr | | 1/1 | | 100% | | Mancao 1996 |
| Illinois | NR | | Case series | | Clinical case, age 39 yr | | 1/1 | | 100% | | Wurtz 2000 |
| Michigan | NR | | Case series | | Clinical case, age 5 and 12 yr | | 1/2 | | 50% | | Abuhammour 2005 |
| North Carolina | 1977 | | Case series | | Clinical case, age 7 yr | | 1/4 | | 25% | | Kelsey 1978 |
| Ohio | 1996 | | Case series | | Hospital patients, age 0-2 yr | | 2/6 | | 33.30% | | Balkhy 2000 |
| West Virginia | 2006-2007 | | Case series | | Pregnant, age 43 yr | | 1/1 | | 100% | | Anon 2009 |
| 2003-2007 | | Surveillance | | Clinical case, age 0-15 yr | | 40/96 | | 41.70% | | Haddow 2011 |
| 2001-2012 | | Population based | | Hospital patients, age >18 yr | | 5/10 | | 50% | | Teleron 2016 |
| Involuntary movement (n=4) | Illinois | 1966-1980 | | Surveillance | | Clinical cases, age 0-14 yr | | 4/59 | | 6.78% | | Clark 1983a |
| Michigan | NR | | Case series | | Clinical case, age 5 and 12 yr | | 1/2 | | 50% | | Abuhammour 2005 |
| Tennessee | 2000 | | Cohort | | Hospital patients, mean age 7.5 yr | | 1/15 | | 6.67% | | Erwin 2002 |
| West Virginia | NR | | Case series | | Clinical case, age 7 yr | | 1/1 | | 100% | | McJunkin 1997 |
| Balance (n=3) | North Carolina | 2004-2009 | | Case series | | Hospital patients, age 1-17 yr | | 27/47 | | 57.40% | | Miller 2012 |
| Ohio | 1996 | | Case series | | Hospital patients, age 0-2 yr | | 3/6 | | 50% | | Balkhy 2000 |
| Tennessee | 2000 | | Cohort | | Hospital patients, mean age 7.5 yr | | 1/15 | | 6.67% | | Erwin 2002 |
| Myalgia (n=4) | Michigan | NR | | Case series | | Clinical case, age 5 and 12 yr | | 1/2 | | 50% | | Abuhammour 2005 |
| Minnesota | 1967-1972 | | Longitudinal | | CNS Patients, age 0-17 yr | | 3/57 | | 5.26% | | Balfour 1973 |
| 1967-1972 | | Longitudinal | | CNS Patients, age 0-17 yr | | 1/57 | | 1.75% | | Balfour 1973 |
| Wisconsin | 2002-2006 | | Surveillance | | Clinical cases, age 1-83 yr | | 33/33 | | 100% | | Sotir 2007 |
| 2007 | | Surveillance | | Clinical case | | NR | | NR | | Wisconsin 2007 |
| Arthralgia (n=3) | West Virginia | 2003-2007 | | Surveillance | | Clinical case, age 0-15 yr | | 7/96 | | 7.29% | | Haddow 2011 |
| Wisconsin | 2002-2006 | | Surveillance | | Clinical cases, age 1-83 yr | | 32/33 | | 97% | | Sotir 2007 |
| 2007 | | Surveillance | | Clinical case | | NR | | NR | | Wisconsin 2007 |
| Dexterity/mobility (n=4) | Minnesota, Wisconsin, Ohio | NR | | Case series | | Clinical case, age 0-17 yr | | NR | | NR | | Chun 1983 |
| North Carolina | 2008 | | Case series | | Clinical case, age 12 yr | | 1/1 | | 100% | | Kobayashi 2011 |
| Tennessee | 2000 | | Cohort | | Hospital patients, mean age 7.5 yr | | 1/15 | | 6.67% | | Erwin 2002 |
| 2012 | | Case series, prevalence | | Clinical case, age 6 yr | | 1/1 | | 100% | | Lambert 2015 |
| **Mental (n=25)** | | | | | | | | | | | | |
| Altered consciousness (n=4) | Minnesota | 1967-1972 | | Longitudinal | | CNS Patients, age 0-17 yr | | 27/57 | | 43.90% | | Balfour 1973 |
| Tennessee | 1997 | | Population based | | Hospital patients, age 3-14 yr | | 7/10 | | 70% | | Jones 1999 |
| 2000 | | Cohort | | Hospital patients, mean age 7.5 yr | | 2/15 | | 13.30% | | Erwin 2002 |
| West Virginia | NR | | Case series | | Clinical case, age 7 yr | | 1/1 | | 100% | | McJunkin 1997 |
| Coma (n=5) | Minnesota | 1967-1972 | | Longitudinal | | CNS Patients, age 0-17 yr | | 7/57 | | 12.30% | | Balfour 1973 |
| Ohio | 1996 | | Case series | | Hospital patients, age 0-2 yr | | 1/6 | | 16.70% | | Balkhy 2000 |
| Tennessee | 2012 | | Case series, prevalence | | Clinical case, age 6 yr | | 1/1 | | 100% | | Lambert 2015 |
| West Virginia | 1987-1996 | | Case series | | Hospital patients, age 0-15 yr | | 42/127 | | 33.10% | | McJunkin 2001 |
| 2003-2007 | | Predictive, surveillance | | Clinical cases, age 0-15 yr | | 4/95 | | 4.21% | | Haddow 2011 |
| Irritable (n=2) | Ohio | 1996 | | Case series | | Hospital patients, age 0-2 yr | | 1/6 | | 16.70% | | Balkhy 2000 |
| Tennessee | NR | | Case series | | Clinical cases, age 10 and 14 yr | | 1/2 | | 50% | | Boyce 1978 |
| Behaviour change (n=3) | Tennessee | 2000 | | Cohort | | Hospital patients, mean age 7.5 yr | | 13/15 | | 86.70% | | Erwin 2002 |
| 2001 | | Case control | | Hospital patients, age <18 yr | | 8/15 | | 53.30% | | Hardin 2003 |
| 1997 | | Population based | | Hospital patients, age 3-14 yr | | 7/10 | | 70% | | Jones 1999 |
| Confused (n=13) | Illinois | NR | | Case series | | Clinical case, age 39 yr | | 1/1 | | 100% | | Wurtz 2000 |
| Michigan | NR | | Case series | | Clinical cases, age 5, 12 yr | | 2/2 | | 100% | | Abuhammour 2005 |
| North Carolina | 2008 | | Case series | | Clinical case, age 12 yr | | 1/1 | | 100% | | Kobayashi 2011 |
| Ohio and West Virginia | 1992-1997 | | Case series | | Hospital patients, age 6-11 yr | | 9/9 | | 100% | | de los Reyes 2008 |
| Tennessee | 2000 | | Cohort | | Hospital patients, mean age 7.5 yr | | 9/15 | | 60% | | Erwin 2002 |
| 2001 | | Case control | | Hospital patients, age <18 yr | | 6/15 | | 40% | | Hardin 2003 |
| West Virginia | 2006-2007 | | Case series | | Pregnant, age 43 yr | | 1/1 | | 100% | | Anon 2009 |
| 2003-2007 | | Surveillance | | Clinical cases, age 0-15 yr | | 32/96 | | 33.30% | | Haddow 2011 |
| NR | | Case series | | Clinical case, age 7 yr | | 1/1 | | 100% | | McJunkin 1997 |
| 1987-1996 | | Case series | | Hospital patients, age 0-15 yr | | 50/119 | | 42% | | McJunkin 2001 |
| 2001-2012 | | Population based | | Hospital patients, age >18 yr | | 5/10 | | 50% | | Teleron 2016 |
| Wisconsin | 1960-1968 | | Case series | | Hospital patients, age 1-11 yr | | 19/19 | | 100% | | Copps 1979 |
| 2002-2006 | | Surveillance | | Clinical cases, age 1-83 yr | | 33/33 | | 100% | | Sotir 2007 |
| Disoriented (n=3) | Indiana | 1996 | | Case series | | Clinical case, age 10 yr | | 1/1 | | 100% | | Sokol 2001 |
| North Carolina | 2004-2009 | | Case series | | Hospital patients, age 1-17 yr | | 27/47 | | 57.40% | | Miller 2012 |
| Ohio | 1996 | | Case series | | Hospital patients, age 0-2 yr | | 2/6 | | 33.30% | | Balkhy 2000 |
| Trouble thinking (n=1) | Tennessee | 2000 | | Cohort | | Hospital patients, mean age 7.5 yr | | 1/15 | | 6.67% | | Erwin 2002 |
| Delirious (n=1) | Wisconsin | 1960-1968 | | Case series | | Hospital patients, age 1-11 yr | | 5/19 | | 26.30% | | Copps 1979 |
| Hallucinations (n=3) | North Carolina | 2004-2009 | | Case series | | Hospital patients, age 1-17 yr | | 27/47 | | 57.40% | | Miller 2012 |
| 1977 | | Case series | | Clinical case, age 7 yr | | 1/4 | | 25% | | Kelsey 1978 |
| Tennessee | 2012 | | Case series, prevalence | | Clinical case, age 6 yr | | 1/1 | | 100% | | Lambert 2015 |
| Lethargic (n=7) | Illinois | 1966-1980 | | Surveillance | | Clinical cases, age 0-14 yr | | 5/59 | | 8.47% | | Clark 1983a |
| Minnesota | 1967-1973 | | Case series | | CNS patients, age 0-19 yr | | NR | | NR | | Balfour 1974 |
| Ohio | 1996 | | Case series | | Hospital patients, age 0-2 yr | | 4/6 | | 66.70% | | Balkhy 2000 |
| Tennessee | NR | | Case series | | Clinical case, age 10, 14 yr | | 1/2 | | 50% | | Boyce 1978 |
| Wisconsin | 1960-1968 | | Case series | | Hospital patients, age 1-11 yr | | 19/19 | | 100% | | Copps 1979 |
| 1965-1982 | | Case series | | Hospital patients, age 0-14 yr | | 123/178 | | 69.10% | | Gundersen 1983 |
| West Virginia | NR | | Case series | | Clinical case, age 7 yr | | 1/1 | | 100% | | McJunkin 1997 |
| Memory loss (n=4) | Minnesota, Wisconsin, Ohio | NR | | Case series | | Clinical cases, age 0-17 yr | | NR | | NR | | Chun 1983 |
| North Carolina | NR | | Case series | | Clinical case, age 95 yr | | 1/1 | | 100% | | Bice 2013 |
| Ohio | 1996 | | Case series | | Hospital patients, age 0-2 yr | | 1/6 | | 16.70% | | Balkhy 2000 |
| Wisconsin | 2002-2006 | | Surveillance | | Clinical cases, age 1-83 yr | | 33/33 | | 100% | | Sotir 2007 |
| Decreased arousal (n=2) | North Carolina | 2004-2009 | | Case series | | Hospital patients, age 1-17 yr | | 27/47 | | 57.40% | | Miller 2012 |
| Tennessee | 2012 | | Case series, prevalence | | Clinical case, age 6 yr | | 1/1 | | 100% | | Lambert 2015 |
| **Encephalopathy (n=27)** | | | | | | | | | | | | |
| Encephalitis (n=21) | USA | | 2003-2007 | | Surveillance | | Clinical cases, age 0-86 yr | | 78/377 | | 20.70% | Haddow 2009 |
| 2003-2012 | | Surveillance | | Clinical cases, age 0-18 yr | | 521/665 | | 78.30% | Gaensbauer 2014 |
| 2014 | | Case series, surveillance | | Clinical cases, age 6-11 yr | | 63/80 | | 78.80% | Lindsey 2015 |
| 2013 | | Surveillance | | Clinical cases, 4-11 yr | | 65/85 | | 76.50% | Lindsey 2014 |
| Georgia | | 2010 | | Surveillance | | Clinical cases | | 1/2 | | 50% | Gabel 2010 |
| 2011 | | Surveillance | | Clinical cases | | 2/2 | | 100% | Gabel 2011 |
| 2014 | | Surveillance | | Clinical case | | 1/1 | | 100% | Gabel 2014 |
| 1982 | | Surveillance | | Clinical cases, age 0-10 yr | | 5/5 | | 100% | Sikes 1984 |
| Minnesota | | 1967-1973 | | Case series | | CNS patients, age 0-19 yr | | 38/83 | | 45.80% | Balfour 1974 |
| 2014 | | Surveillance | | Clinical cases, age 6-11 yr | | 4/4 | | 100% | Minnesota 2015 |
| North Carolina | | 1977-1979 | | Population based, prevalence | | Children, age 2-9 yr | | 7/12 | | 58.30% | Kappus 1982 |
| 2008 | | Case series | | Clinical case, age 12 yr | | 1/1 | | 100% | Kobayashi 2011 |
| Tennessee | | 2012 | | Case series, prevalence | | Clinical case, age 6 yr | | 1/1 | | 100% | Lambert 2015 |
| West Virginia | | 1987 | | Surveillance | | Clinical cases, age 1-14 yr | | 11/19 | | 57.90% | CDC 1988b |
| 1987 | | Case series | | Hospital patients, age 1-14 yr | | 11/19 | | 57.90% | CDC 1988b |
| NR | | Case series | | Clinical case, age 7 yr | | 1/1 | | 100% | McJunkin 1997 |
| 1987-1988 | | Case control | | Clinical cases, age 1-14 yr | | 20/35 | | 57.10% | Woodruff 1992 |
| 2001-2012 | | Population based | | Hospital patients, age >18 yr | | 10/10 | | 100% | Teleron 2016 |
| 2003-2007 | | Surveillance | | Clinical cases, age 0-15 yr | | 38/94 | | 40.60% | Haddow 2011 |
| Wisconsin | | 1972-1973, 1977 | | Cohort, cross sectional | | General population, age 0-60+ | | NR | | NR | Teleron 1983 |
| Meningitis (n=11) | USA | | 2003-2007 | | Surveillance | | Clinical cases, age 0-86 yr | | 87/506 | | 17.20% | Haddow 2009 |
| 2003-2012 | | Surveillance | | Clinical cases, age 0-18 yr | | 134/665 | | 20.20% | Gaensbauer 2014 |
| 2014 | | Case series, surveillance | | Clinical cases, age 6-11 yr | | 12/80 | | 15% | Lindsey 2015 |
| 2013 | | Surveillance | | Clinical cases, 4-11 yr | | 8/85 | | 9.41% | Lindsey 2014 |
| Georgia | | 2010 | | Surveillance | | Clinical cases | | 1/2 | | 50% | Gabel 2010 |
| 1982 | | Surveillance | | Clinical cases, age 0-10 yr | | 3/3 | | 100% | Sikes 1984 |
| North Carolina | | 1977-1979 | | Population based, prevalence | | Children, age 2-9 yr | | 3/12 | | 25% | Kappus 1982 |
| West Virginia | | 1987 | | Surveillance | | Clinical cases, age 1-14 yr | | 4/19 | | 21.10% | CDC 1988b |
| 1987-1996 | | Case series | | Hospital patients, age 0-15 yr | | 17/33 | | 51.50% | McJunkin 2001 |
| 1987-1988 | | Case control | | Clinical cases, age 1-14 yr | | 7/35 | | 20% | Woodruff 1992 |
| 2003-2007 | | Surveillance | | Clinical cases, age 0-15 yr | | 39/94 | | 41.60% | Haddow 2011 |
| Meningoencephalitis (n=7) | USA | | 2003-2007 | | Surveillance | | Clinical cases, age 0-86 yr | | 242/377 | | 56.30% | Haddow 2009 |
| Georgia | | 2011 | | Surveillance | | Clinical cases | | 2/2 | | 100% | Gabel 2011 |
| Minnesota | | 1967-1973 | | Case series | | CNS patients, age 0-19 yr | | NR | | NR | Balfour 1974 |
| North Carolina | | NR | | Case series | | Clinical case, age 95 yr | | 1/1 | | 100% | Bice 2013 |
| West Virginia | | 1987-1996 | | Case series | | Hospital patients, age 0-15 yr | | 16/33 | | 48.50% | McJunkin 2001 |
| 1987-1988 | | Case control | | Clinical cases, age 1-14 yr | | 8/35 | | 22.90% | Woodruff 1992 |
| 1987 | | Surveillance | | Clinical cases, age 1-14 yr | | 4/19 | | 21.10% | CDC 1988b |
| 1987 | | Case series | | Hospital patients, age 1-14 yr | | 4/19 | | 21.10% | CDC 1988b |
| Meningeal irritation (n=3) | Michigan | | NR | | Case series | | Clinical cases, age 5 and 12 yr | | 2/2 | | 100% | Abuhammour 2005 |
| Minnesota | | 1967-1973 | | Case series | | CNS patients, age 0-19 yr | | NR | | NR | Balfour 1974 |
| 1967-1972 | | Longitudinal | | CNS patients, age 0-17 yr | | 30/57 | | 52.60% | Balfour 1973 |
| Meningismus (n=2) | Ohio | | 1996 | | Case series | | Hospital patients, age 0-2 yr | | 1/6 | | 16.70% | Balkhy 2000 |
| Tennessee | | 1997 | | Surveillance, population based | | Hospital patients, age 3-14 yr | | 1/10 | | 10% | Jones 1999 |
| **Seizures (n=25)** | | | | | | | | | | | | |
| General seizure (n=5) | Alabama | | 1994 | | Case series | | Clinical case, age 7 yr | | 1/1 | | 100% | Mancao 1996 |
| Michigan | | NR | | Case series | | Clinical cases, age 5 and 12 yr | | 1/2 | | 50% | Abuhammour 2005 |
| Ohio, West Virginia | | 1992-1997 | | Case series | | Hospital patients, age 6-11 yr | | 2/9 | | 22.20% | de los Reyes 2008 |
| Ohio | | 1996 | | Case series | | Hospital patients, age 0-2 yr | | 3/6 | | 50% | Balkhy 2000 |
| Wisconsin | | 1960-1968 | | Case series | | Hospital patients, age 1-11 yr | | 5/19 | | 26.30% | Coppsn 1979 |
| Focal seizure (n=4) | Michigan | | NR | | Case series | | Clinical cases, age 5 and 12 yr | | 1/2 | | 50% | Abuhammour 2005 |
| Ohio | | 1996 | | Case series | | Hospital patients, age 0-2 yr | | 1/6 | | 16.70% | Balkhy 2000 |
| Ohio, West Virginia | | 1992-1997 | | Case series | | Hospital patients, age 6-11 yr | | 7/9 | | 77.80% | de los Reyes 2008 |
| Wisconsin | | 1960-1968 | | Case series | | Hospital patients, age 1-11 yr | | 2/19 | | 10.50% | Copps 1979 |
| Partial seizure (n=2) | Florida | | NR | | Case series | | Clinical case | | 4/4 | | 100% | Tatum 1999 |
| Indiana | | 1996 | | Case series | | Clinical case, age 10 yr | | 1/1 | | 100% | Sokol 2001 |
| Convulsions (n=2) | Wisconsin | | 1960-1968 | | Case series | | Hospital patients, age 1-11 yr | | 7/19 | | 36.80% | Copps 1979 |
| 2002-2006 | | Surveillance | | Clinical cases, age 1-83 yr | | 31/33 | | 93.90% | Sotir 2007 |
| Seizure during acute infection (n=1) | Wisconsin | | 1965-1982 | | Case series | | Hospital patients, age 0-14 yr | | 58/178 | | 32.60% | Gundersen 1983 |
| After acute infection (n=1) | Wisconsin | | 1965-1982 | | Case series | | Hospital patients, age 0-14 yr | | 16/178 | | 8.99% | Gundersen 1983 |
| Unspecified seizure (n=16) | Georgia | | 1982 | | Surveillance | | Clinical cases, age 0-10 yr | | 5/8 | | 62.50% | Sikes 1984 |
| Minnesota | | 1967-1973 | | Case series | | CNS patients, age 0-19 yr | | NR | | NR | Balfour 1974 |
| 1967-1972 | | Longitudinal | | CNS patients, age 0-17 yr | | 28/57 | | 49.10% | Balfour 1973 |
| North Carolina | | 2008 | | Case series | | Clinical case, age 12 yr | | 1/1 | | 100% | Kobayashi 2011 |
| 2004-2009 | | Case series | | Hospital patients, age 1-17 yr | | 9/47 | | 19.10% | Miller 2012 |
| 1977 | | Case series | | Clinical case, age 7 yr | | 1/4 | | 25% | Kelsey 1978 |
| Tennessee | | NR | | Case series | | Clinical cases, age 10, 14 yr | | 1/2 | | 50% | Boyce 1978 |
| 2000 | | Cohort | | Hospital patients, mean age 7.5 yr | | 4/15 | | 26.70% | Erwin 2002 |
| 2001 | | Case control | | Hospital patients, age <18 yr | | 6/15 | | 40% | Hardin 2003 |
| 1997 | | Population based | | Hospital patients, age 3-14 yr | | 8/10 | | 80% | Jones 1999 |
| 1998-1999 | | Case series, prevalence | | Hospital patients, age 0-13 yr | | 4/15 | | 26.70% | Jones 2000 |
| 2012 | | Case series, prevalence | | Clinical case, age 6 yr | | 1/1 | | 100% | Lambert 2015 |
| West Virginia | | 2001-2012 | | Population based | | Hospital patients, age >18 yr | | 2/10 | | 20% | Teleron 2016 |
| NR | | Case series | | Clinical case, age 7 yr | | 1/1 | | 100% | McJunkin 1997 |
| 1987-1996 | | Case series | | Hospital patients, age 0-15 yr | | 58/127 | | 45.70% | McJunkin 2001 |
| 2003-2007 | | Surveillance | | Clinical cases, age 0-15 yr | | 23/96 | | 24% | Haddow 2011 |
| **Speech problems (n=10)** | | | | | | | | | | | | |
| Trouble understanding/articulating (n=6) | Indiana | | 1996 | | Case series | | Clinical case, age 10 yr | | 1/1 | | 100% | Sokol 2001 |
| Michigan | | NR | | Case series | | Clinical cases, age 5 and 12 yr | | 1/2 | | 50% | Abuhammour 2005 |
| Minnesota, Wisconsin, Ohio | | NR | | Case series | | Clinical case, age 0-17 yr | | NR | | NR | Chun 1983 |
| North Carolina | | 2008 | | Case series | | Clinical case, age 12 yr | | 1/1 | | 100% | Kobayashi 2011 |
| 1977 | | Case series | | Clinical case, age 7 yr | | 1/4 | | 25% | Kelsey 1978 |
| Tennessee | | 2001 | | Case control | | Hospital patients, age <18 yr | | 5/13 | | 38.50% | Hardin 2003 |
| Slurred speech (n=3) | North Carolina | | 2004-2009 | | Case series | | Hospital patients, age 1-17 yr | | 27/47 | | 57.40% | Miller 2012 |
| Ohio | | 1996 | | Case series | | Hospital patients, age 0-2 yr | | 1/6 | | 16.70% | Balkhy 2000 |
| Wisconsin | | 2002-2006 | | Surveillance | | Clinical case, age 1-83 yr | | 31/33 | | 93.90% | Sotir 2007 |
| Non-verbal (n=1) | West Virginia | | NR | | Case series | | Clinical case, age 7 yr | | 1/1 | | 100% | McJunkin 1997 |
| Repetitive speech (n=1) | Indiana | | 1996 | | Case series | | Clinical case, age 10 yr | | 1/1 | | 100% | Sokol 2001 |
| **Eye problems (n=14)** | | | | | | | | | | | | |
| Photophobia (n=11) | Michigan | | NR | | Case series | | Clinical cases, age 5 and 12 yr | | 2/2 | | 100% | Abuhammour 2005 |
| Minnesota | | 1967-1972 | | Longitudinal | | CAN patients, age 0-17 yr | | 2/57 | | 3.51% | Balfour 1973 |
| Mississippi | | 1968 | | Cross sectional | | General population, age 0-40+ yr | | 1/4 | | 25% | Monath 1970 |
| Developmental delay, age 4-15 yr | |
| Missouri | | 2009 | | Case series | | Clinical case, age 8 yr | | 1/1 | | 100% | CDC 2010 |
| Tennessee | | 2001 | | Case control | | Hospital patients, age <18 yr | | 13/15 | | 86.70% | Hardin 2003 |
| 1997 | | Population based | | Hospital patients, age 3-14 yr | | 4/10 | | 40% | Jones 1999 |
| 2000 | | Cohort | | Hospital patients, mean age 7.5 yr | | 11/15 | | 73.30% | Erwin 2002 |
| West Virginia | | 2006-2007 | | Case series | | Pregnant, age 43 | | 1/1 | | 100% | Anon 2009 |
| 2001-2012 | | Population based | | Hospital patients, age >18 yr | | 3/10 | | 30% | Teleron 2016 |
| 2003-2007 | | Surveillance | | Clinical cases, age 0-15 yr | | 50/96 | | 52.10% | Haddow 2011 |
| Wisconsin | | 2002-2006 | | Surveillance | | Clinical cases, age 1-83 yr | | 33/33 | | 100% | Sotir 2007 |
| Eyes deviated (n=3) | Georgia | | 1982 | | Surveillance | | Clinical cases, age 0-10 yr | | 1/8 | | 12.50% | Sikes 1984 |
| Tennessee | | NR | | Case series | | Clinical cases, age 10, 14 yr | | 1/2 | | 50% | Boyce 1978 |
| West Virginia | | NR | | Case series | | Clinical case, age 7 yr | | 1/1 | | 100% | McJunkin 1997 |
| Excessive blinking (n=1) | West Virginia | | NR | | Case series | | Clinical case, age 7 yr | | 1/1 | | 100% | McJunkin 1997 |
| **Not specified (n=8)** | | | | | | | | | | | | |
| Not specified (n=8) | USA | | 2014 | | Case series, surveillance | | Clinical cases, age 6-11 yr | | 1/80 | | 1.25% | Lindsey 2015 |
| Georgia | | 2014 | | Surveillance | | Clinical case | | 1/1 | | 100% | Gabel 2014 |
| Minnesota | | 1967-1972 | | Longitudinal | | CNS patients, age 0-17 yr | | 9/57 | | 15.80% | Balfour 1973 |
| 2014 | | Surveillance | | Clinical cases, age 6-11 yr | | 4/4 | | 100% | Minnesota 2015 |
| North Carolina | | 2008 | | Case series | | Clinical case, age 12 yr | | 1/1 | | 100% | Kobayashi 2011 |
| Tennessee | | 1997 | | Population based | | Hospital patients, age 3-14 yr | | 1/10 | | 10% | Jones 1999 |
| 2012 | | Case series, prevalence | | Clinical case, age 6 yr | | 1/1 | | 100% | Lambert 2015 |
| West Virginia | | 1987-1996 | | Case series | | Hospital patients, age 0-15 yr | | 23/126 | | 18.30% | McJunkin 2001 |
| **Other (n=35)** | | | | | | | | | | | | |
| Fever (n=30) | USA | | 2003-2007 | | Surveillance | | Clinical case, age 0-86 yr | | 18/437 | | 4.12% | Haddow 2009 |
| Alabama | | 1994 | | Case series | | Clinical case, age 7 yr | | 1/1 | | 100% | Mancao 1996 |
| Georgia | | 1982 | | Surveillance | | Clinical case, age 0-10 yr | | 8/8 | | 100% | Sikes 1984 |
| Illinois | | 1966-1980 | | Surveillance | | Clinical cases, age 0-14 yr | | 55/59 | | 93% | Clark 1983a |
| NR | | Case series | | Clinical case, age 39 yr | | 1/1 | | 100% | Wurtz 2000 |
| Indiana | | 1996 | | Case series | | Clinical case, age 10 yr | | 1/1 | | 100% | Sokol 2001 |
| Michigan | | NR | | Case series | | Clinical cases, age 5 and 12 yr | | 2/2 | | 100% | Abuhammour 2005 |
| Minnesota | | 1967-1973 | | Case series | | CNS patients, age 0-19 yr | | NR | | NR | Balfour 1974 |
| 1967-1972 | | Longitudinal | | CNS patients, age 0-17 yr | | 57/57 | | 100% | Balfour 1973 |
| Mississippi | | 1968 | | Cross sectional | | General population, age 0-40 yr | | 1/4 | | 25% | Monath 1970 |
| Developmental delay, age 4-15 yr | |
| Missouri | | 2009 | | Case series | | Clinical case, age 8 yr | | 1/1 | | 100% | CDC 2010 |
| North Carolina | | NR | | Case series | | Clinical case, age 95 years | | 1/1 | | 100% | Bice 2013 |
| 2008 | | Clinical case, age 12 years | | 1/1 | | 100% | Kobayashi 2011 |
| 2004-2009 | | Hospital patients, age 1-17 years | | 20/47 | | 42.60% | Miller 2012 |
| 1977 | | Clinical case, age 7 years | | 1/4 | | 25% | Kelsey 1978 |
| Ohio | | 1996 | | Case series | | Hospital patients, age 0-2 yr | | 6/6 | | 100% | Balkhy 2000 |
| Ohio, West Virginia | | 1992-1997 | | Case series | | Hospital patients, age 6-11 yr | | 9/9 | | 100% | de los Reyes 2008 |
| Tennessee | | NR | | Case series | | Clinical cases, age 10, 14 yr | | 2/2 | | 100% | Boyce 1978 |
| 2000 | | Cohort | | Hospital patients, mean age 7.5 yr | | 15/15 | | 100% | Erwin 2002 |
| 2001 | | Case control | | Hospital patients, age 0-18 yr | | 15/15 | | 100% | Hardin 2003 |
| 1997 | | Population based | | Hospital patients, age 3-14 yr | | 10/10 | | 100% | Jones 1999 |
| 1998-1999 | | Case series, prevalence | | Hospital patients, age 0-13 yr | | 14/15 | | 93.30% | Jones 2000 |
| West Virginia | | 1987-1996 | | Case series | | Hospital patients, age 0-15 yr | | 107/125 | | 85.60% | McJunkin 2001 |
| 2006-2007 | | Case series | | Pregnant woman, age 43 | | 1/1 | | 100% | Anon 2009 |
| 2003-2007 | | Surveillance | | Clinical case, age 0-15 yr | | 73/96 | | 76% | Haddow 2011 |
| 2001-2012 | | Population based | | Hospital patients, age >18 yr | | 9/10 | | 90% | Teleron 2016 |
| Wisconsin | | 1960-1968 | | Case series | | Clinical cases, age 1-11 yr | | 19/19 | | 100% | Copps 1979 |
| 2002-2006 | | Surveillance | | Clinical case, age 1-83 yr | | 49/53 | | 92% | Sotir 2007 |
| 1972-1973, 1977 | | Cohort, Cross sectional | | General population, age 0-60+ | | 1/6 | | 16.70% | Teleron 1983 |
| 2007 | | Surveillance | | Clinical case | | NR | | NR | Wisconsin 2007 |
| Vomiting (n=22) | Georgia | | 1982 | | Surveillance | | Clinical cases, age 0-10 yr | | 3/8 | | 37.50% | Sikes 1984 |
| Indiana | | 1996 | | Case series | | Clinical case, 10 yr | | 1/1 | | 100% | Sokol 2001 |
| Michigan | | NR | | Case series | | Clinical case, age 5 and 12 yr | | 2/2 | | 100% | Abuhammour 2005 |
| Minnesota | | 1967-1973 | | Case series | | CNS patients, age 0-19 yr | | NR | | NR | Balfour 1974 |
| Mississippi | | 1968 | | Cross sectional | | General population, age 0-40+ | | 1/4 | | 25% | Monath 1970 |
| Missouri | | 2009 | | Case series | | Clinical case, age 8 yr | | 1/1 | | 100% | CDC 2010 |
| North Carolina | | 2004-2009 | | Case series | | Hospital patients, age 1-17 yr | | 36/46 | | 78.30% | Miller 2012 |
| Mississippi | | 1977 | | Case series | | Clinical case, age 7 yr | | 1/4 | | 25% | Kelsey 1978 |
| Ohio, West Virginia | | 1992-1997 | | Case series | | Hospital patients, age 6-11 yr | | NR | | NR | de los Reyes 2008 |
| Tennessee | | NR | | Case series | | Clinical cases, age 10, 14 yr | | 2/2 | | 100% | Boyce 1978 |
| 2000 | | Cohort | | Hospital patients, mean age 7.5 yr | | 14/15 | | 93.30% | Erwin 2002 |
| 2001 | | Case control | | Hospital patients, age <18 yr | | 12/15 | | 80% | Hardin 2003 |
| 1997 | | Population based | | Hospital patients, age 3-14 yr | | 7/10 | | 70% | Jones 1999 |
| 1998-1999 | | Case series, prevalence | | Hospital patients, age 0-13 yr | | 10/15 | | 66.75 | Jones 2000 |
| 2012 | | Case series, prevalence | | Clinical case, age 6 yr | | 1/1 | | 100% | Lambert 2015 |
| Wisconsin | | 1960-1968 | | Case series | | Hospital patients, age 1-11 yr | | 17/19 | | 89.50% | Copps 1979 |
| 1965-1982 | | Case series | | Hospital patients, age 0-14 yr | | 151/178 | | 84.80% | Gundersen 1983 |
| 2002-2006 | | Surveillance | | Clinical cases, age 1-83 yr | | 33/33 | | 100% | Sotir 2007 |
| West Virginia | | 2003-2007 | | Surveillance | | Clinical cases, age 0-15 yr | | 72/96 | | 75% | Haddow 2011 |
| NR | | Case series | | Clinical case, age 7 yr | | 1/1 | | 100% | McJunkin 1997 |
| 1987-1996 | | Case series | | Hospital patients, age 0-15 yr | | 89/127 | | 70.10% | McJunkin 2001 |
| 2001-2012 | | Population based | | Hospital patients, age >18 yr | | 2/10 | | 20% | Teleron 2016 |
| Nausea (n=8) | Georgia | | 1982 | | Surveillance | | Clinical case, age 0-10 yr | | 3/8 | | 37.5% | Sikes 1984 |
| Mississippi | | 1968 | | Cross sectional | | Developmental delay, age 4-15 yr | | 1/4 | | 25% | Monath 1970 |
| Missouri | | 2009 | | Case series | | Clinical case, age 8 yr | | 1/1 | | 100% | CDC 2010 |
| North Carolina | | NR | | Case series | | Clinical case, age 95 yr | | 1/1 | | 100% | Bice 2013 |
| 1977 | | Case series | | Clinical case, age 7 yr | | 1/4 | | 25% | Kelsey 1978 |
| Wisconsin | | 2002-2006 | | Surveillance | | Clinical cases, age 1-83 yr | | 33/33 | | 100% | Sotir 2007 |
| 2007 | | Surveillance | | Clinical case | | NR | | NR | Wisconsin 2007 |
| West Virginia | | 2003-2007 | | Surveillance | | Clinical cases, age 0-15 yr | | 48/96 | | 50% | Haddow 2011 |
| Michigan | | NR | | Case series | | Clinical cases, age 5 and 12 yr | | 1/2 | | 50% | Abuhammour 2005 |
| Ohio | | 1996 | | Case series | | Hospital patients, age 0-2 yr | | 1/6 | | 16.70% | Balkhy 2000 |
| Minnesota | | 1967-1973 | | Case series | | CNS Patients, age 0-19 yr | | NR | | NR | Balfour 1974 |
| Incontinence (n=2) | North Carolina | | NR | | Case series | | Clinical case, age 95 yr | | 1/1 | | 100% | Bice 2013 |
| Minnesota | | 1967-1973 | | Case series | | CNS Patients, age 0-19 yr | | NR | | NR | Balfour 1974 |
| alaise (n=2) | Minnesota | | 1967-1973 | | Case series | | CNS Patients, age 0-19 yr | | NR | | NR | Balfour 1974 |
| Missouri | | 2009 | | Case series | | Clinical case, age 8 yr | | 1/1 | | 100% | CDC 2010 |
| Anorexia (n=1) | Indiana | | 1996 | | Case series | | Clinical case, age 10 yr | | 1/1 | | 100% | Sokol 2001 |
| Abdominal pain (n=2) | Minnesota | | 1967-1973 | | Case series | | CNS Patients, age 0-19 yr | | NR | | NR | Balfour 1974 |
| Diarrhea (n=5) | Wisconsin | | 1965-1982 | | Case series | | Hospital patients, age 0-14 yr | | 9/178 | | 5.06% | Gundersen 1983 |
| 2002-2006 | | Surveillance | | Clinical case, age 1-83 yr | | 33/33 | | 100% | Sotir 2007 |
| 2007 | | Surveillance | | Clinical case | | NR | | NR | Wisconsin 2007 |
| Minnesota | | 1967-1972 | | Longitudinal | | CNS Patients, age 0-17 yr | | 32/57 | | 56.10% | Balfour 1973 |
| North Carolina | | 1977 | | Case series | | Clinical case, age 7 yr | | 1/4 | | 25% | Kelsey 1978 |
| 1977-1979 | | Population based, prevalence | | Children, age 2-9 yr | | 2/12 | | 16.70% | Kappus 1982 |
| Gastrointestinal (n=2) | Tennessee | | 2001 | | Case control | | Hospital patients, age <18 yr | | 2/15 | | 13.30% | Hardin 2003 |
| Minnesota | | 1967-1972 | | Longitudinal | | CNS Patients, age 0-17 yr | | 10/57 | | 17.50% | Balfour 1973 |
| Respiratory problems (n=2) | Mississippi | | 1968 | | Cross sectional | | General population, age 0-40+ | | 1/4 | | 25% | Monath 1970 |
| Developmental delay, age 4-15 yr | | 2/15 | | 13.30% | Monath 1970 |
| Sore throat (n=2) | Minnesota | | 1967-1972 | | Longitudinal | | CNS Patients, age 0-17 yr | | 10/57 | | 17.5% | Balfour 1973 |
| West Virginia | | 2006-2007 | | Case series | | Pregnant, age 43 yr | | 1/1 | | 100% | Anon 2009 |
| Cough (n=1) | Wisconsin | | 2002-2006 | | Surveillance | | Clinical case, age 1-83 yr | | 33/33 | | 100% | Sotir 2007 |
| Rash (n=3) | Missouri | | 2009 | | Case series | | Clinical case, age 8 yr | | 1/1 | | 100% | CDC 2010 |
| Wisconsin | | 2002-2006 | | Surveillance | | Clinical case, age 1-83 yr | | 33/33 | | 100% | Sotir 2007 |
| 2007 | | Surveillance | | Clinical case | | NR | | NR | Wisconsin 2007 |
| Fatigue (n=3) | West Virginia | | NR | | Case series | | Clinical case, age 7 yr | | 1/1 | | 100% | McJunkin 1997 |
| Wisconsin | | 2007 | | Surveillance | | Clinical case | | NR | | NR | Wisconsin 2007 |
| West Virginia | | 1987 | | Case series, surveillance | | Hospital patients, age 1-14 yr | | 1/19 | | 5.26% | CDC 1988b |
| Chills (n=2) | West Virginia | | NR | | Case series | | Clinical case, age 7 yr | | 1/1 | | 100% | McJunkin 1997 |
| Edema (n=1) | North Carolina | | 2004-2009 | | Case series | | Hospital patients, age 1-17 yr | | 7/47 | | 14.90% | Miller 2012 |
| Cranial pressure (n=1) | USA | | 2003-2007 | | Predictive, surveillance | | Clinical cases, age 0-86 yr | | 3/43 | | 6.98% | Haddow 2009 |
| Bradycardia (n=1) | West Virginia | | NR | | Case series | | Clinical case, age 7 yr | | 1/1 | | 100% | McJunkin 1997 |
| Low sodium (n=1) | North Carolina | | 2004-2009 | | Case series | | Hospital patients, age 1-17 yr | | 7/47 | | 14.90% | Miller 2012 |
| Not specified (n=1) | USA | | 2003-2007 | | Predictive, surveillance | | Clinical cases, age 0-86 yr | | 3/43 | | 6.98% | Haddow 2009 |

1 Please refer to supplementary material S2 for the citation list of included articles.
